# Supplementary material for: Asymmetric total synthesis of (+)-(2R,4′R,8′R)-α-tocopherol enabled by enzymatic desymmetrization
Source: Royal Society of Chemistry journal article supplement (doi:10.1039/d2ob00384h), 2022-01-01
Supplement: d2ob00384h1.pdf [file d2ob00384h1.pdf]

## Supporting Information Appendix

### Asymmetric Total Synthesis of (+)-(2*R*,4'*R*,8'*R*)- $\alpha$ -Tocopherol Enabled by Enzymatic Desymmetrization

Haidi Yang,<sup>1</sup> Jinyao Liu,<sup>1</sup> Pan Hu,<sup>2</sup> Liang Gao,<sup>2</sup> Zedu Huang,<sup>1\*</sup> and Fener Chen<sup>1,2\*</sup>

<sup>1</sup>Department of Chemistry, Engineering Center of Catalysis and Synthesis for Chiral  
Molecules, Fudan University  
Shanghai Engineering Research Center of Industrial Asymmetric Catalysis of Chiral Drugs,  
220 Handan Road, Shanghai, 200433, P. R. China.  
E-mail: huangzedu@fudan.edu.cn, rfchen@fudan.edu.cn

<sup>2</sup>Key Laboratory of Green Chemical Engineering Process of Ministry of Education, School of  
Chemical Engineering and Pharmacy, Wuhan Institute of Technology, Wuhan, 430205,  
P. R. China.

\*Authors to whom correspondence should be addressed

|                                                                                      |           |
|--------------------------------------------------------------------------------------|-----------|
| <b>Table of Contents</b> .....                                                       | <b>2</b>  |
| <b>Table S1. Screening conditions for the Heck coupling between 40a and 41</b> ..... | <b>3</b>  |
| <b>Table S2. Enzymatic desymmetric transesterification of triol 38</b> .....         | <b>4</b>  |
| <b><sup>1</sup>H NMR and <sup>13</sup>C NMR Spectra</b> .....                        | <b>5</b>  |
| <b>Chiral HPLC spectra</b> .....                                                     | <b>36</b> |
| <b>Crystal data</b> .....                                                            | <b>41</b> |

**Table S1. Screening conditions for the Heck coupling between 40a and 41<sup>a</sup>**

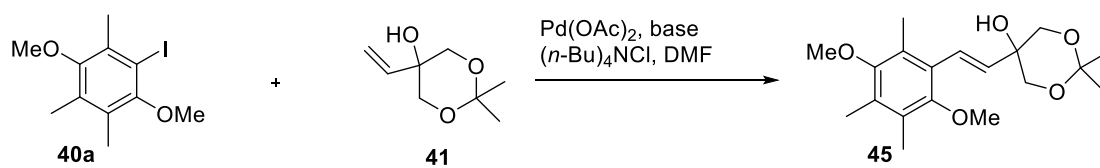

| Entry | Base                            | Conversion (%) <sup>b</sup> | Yield of <b>45</b> (%) <sup>b</sup> |
|-------|---------------------------------|-----------------------------|-------------------------------------|
| 1     | NEt <sub>3</sub>                | 23.3                        | 23.3                                |
| 2     | NaHCO <sub>3</sub>              | 74.3                        | 74.3                                |
| 3     | Na <sub>2</sub> CO <sub>3</sub> | 98.5                        | 98.5 (85.0 <sup>c</sup> )           |
| 4     | Ag <sub>2</sub> CO <sub>3</sub> | 8.6                         | 8.6                                 |
| 5     | Cs <sub>2</sub> CO <sub>3</sub> | 89.0                        | 74.2                                |

<sup>a</sup>Reaction conditions: **40a** (0.16 mmol), **41** (0.20 mmol, 1.25 equiv.), Pd(OAc)<sub>2</sub> (0.008 mmol, 0.05 equiv.), base (0.65 mmol, 4 equiv.), (n-Bu)<sub>4</sub>NCl (0.21 mmol, 1.3 equiv.) in DMF (1.0 mL).

<sup>b</sup>Determined by GC-MS analysis. <sup>c</sup>Isolated yield.

**Table S2. Enzymatic desymmetric transesterification of triol **38**<sup>a</sup>**

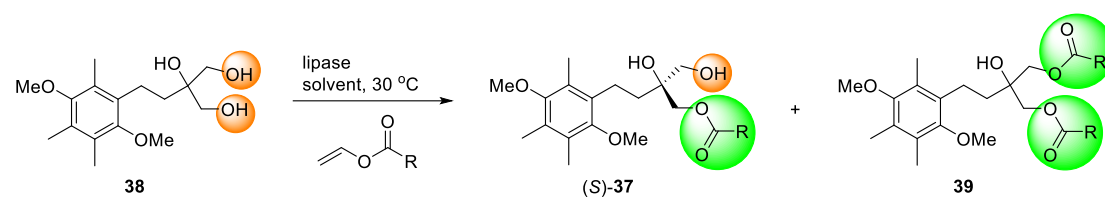

| Entry | Lipase    | R  | Solvent                        | <b>38</b> remaining (%) <sup>b</sup> | Yield of ( <i>S</i> )- <b>37</b> (%) <sup>b</sup> | Yield of <b>39</b> (%) <sup>b</sup> | Ee of ( <i>S</i> )- <b>37</b> (%) <sup>b</sup> |
|-------|-----------|----|--------------------------------|--------------------------------------|---------------------------------------------------|-------------------------------------|------------------------------------------------|
| 1     | PPL       | Me | Et <sub>2</sub> O              | 60.1                                 | 39.9                                              | 0                                   | 85.7                                           |
| 2     | lipase-M  | Me | Et <sub>2</sub> O              | 87.8                                 | 12.2                                              | 0                                   | 63.5                                           |
| 3     | PPL       | Ph | Et <sub>2</sub> O              | 81.7                                 | 18.3                                              | 0                                   | 56.9                                           |
| 4     | lipase-M  | Ph | Et <sub>2</sub> O              | 95.6                                 | 4.4                                               | 0                                   | ND <sup>c</sup>                                |
| 5     | PPL       | Pr | Et <sub>2</sub> O              | 10.3                                 | 88.3                                              | 1.2                                 | 89.9                                           |
| 6     | lipase-M  | Pr | Et <sub>2</sub> O              | 70.4                                 | 29.6                                              | 0                                   | 62.6                                           |
| 7     | lipase-PF | Pr | Et <sub>2</sub> O              | 47.8                                 | 45.1                                              | 7.1                                 | 34.5                                           |
| 8     | lipase-PS | Pr | Et <sub>2</sub> O              | 95.8                                 | 4.2                                               | 0                                   | ND                                             |
| 9     | lipase-G  | Pr | Et <sub>2</sub> O              | 96.7                                 | 3.3                                               | 0                                   | ND                                             |
| 10    | lipase-N  | Pr | Et <sub>2</sub> O              | 0                                    | 4.5                                               | 95.5                                | 11.9                                           |
| 11    | PPL       | Pr | ( <i>i</i> -Pr) <sub>2</sub> O | 0.3                                  | 90.1                                              | 9.6                                 | >99                                            |

<sup>a</sup>Reaction conditions (1 mL): **38** (3 mg), lipase (3 mg), and transesterification reagent (0.1 mmol) in solvent. Reaction mixtures were incubated at 30 °C with 200 rpm shaking for 12 h.

<sup>b</sup>Determined by chiral HPLC analysis. <sup>c</sup>Not determined.

The  $^1\text{H}$  NMR (400 MHz,  $\text{CDCl}_3$ ) Spectrum of **32**

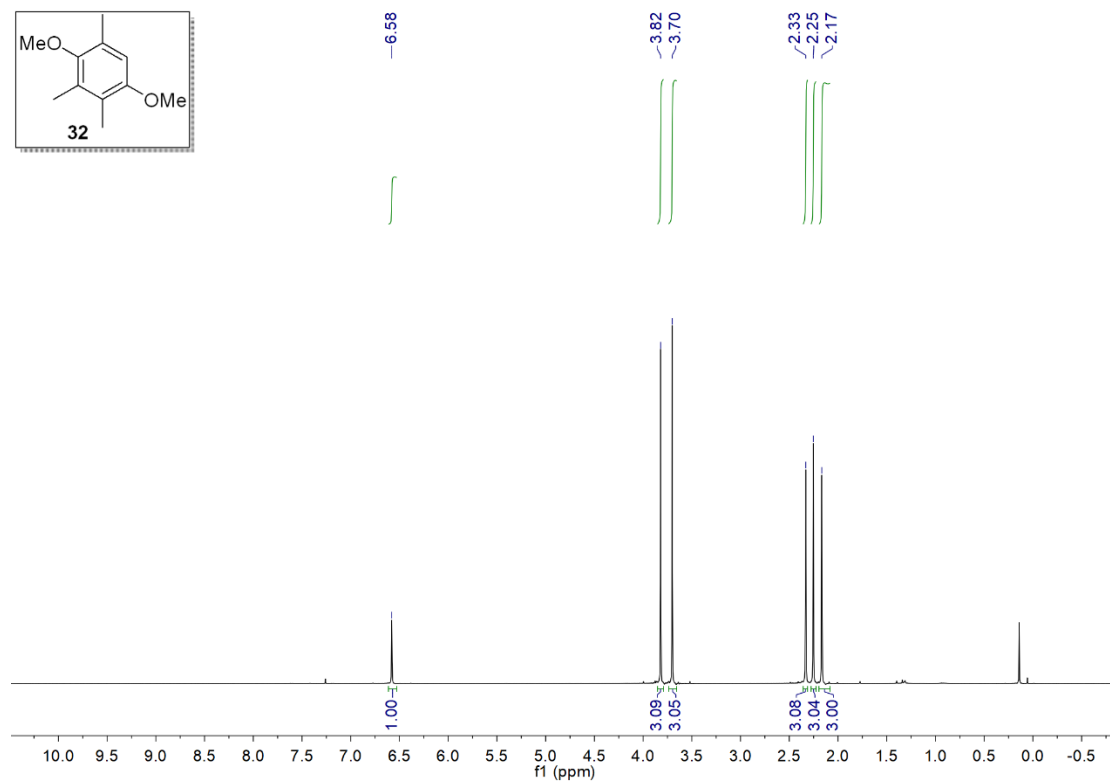

The  $^{13}\text{C}\{^1\text{H}\}$  NMR (100 MHz,  $\text{CDCl}_3$ ) Spectrum of **32**

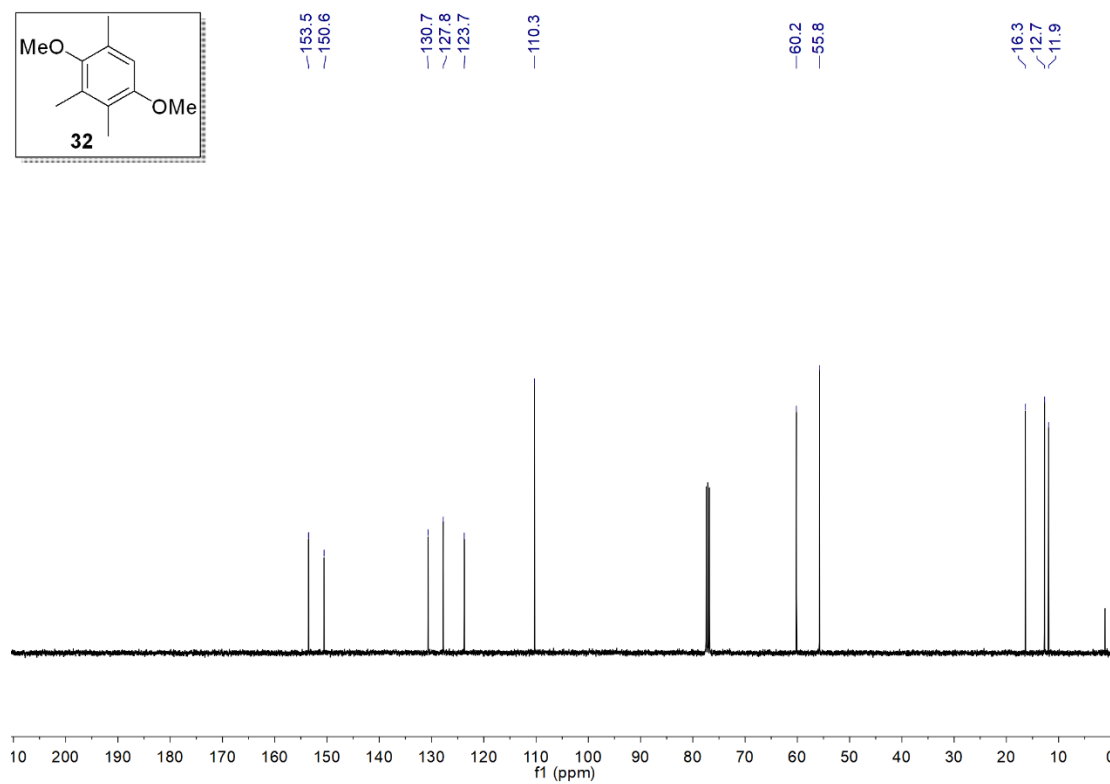

### The $^1\text{H}$ NMR (400 MHz, $\text{CDCl}_3$ ) Spectrum of 40a

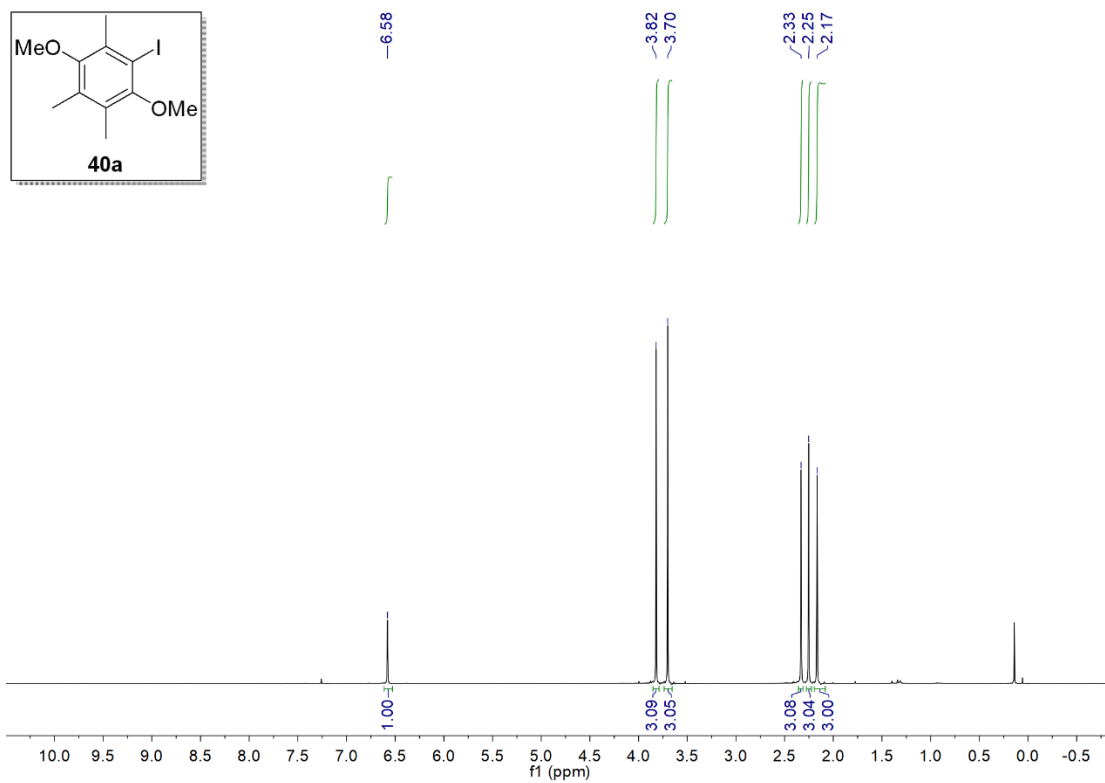

### The $^{13}\text{C}\{^1\text{H}\}$ NMR (100 MHz, $\text{CDCl}_3$ ) Spectrum of 40a

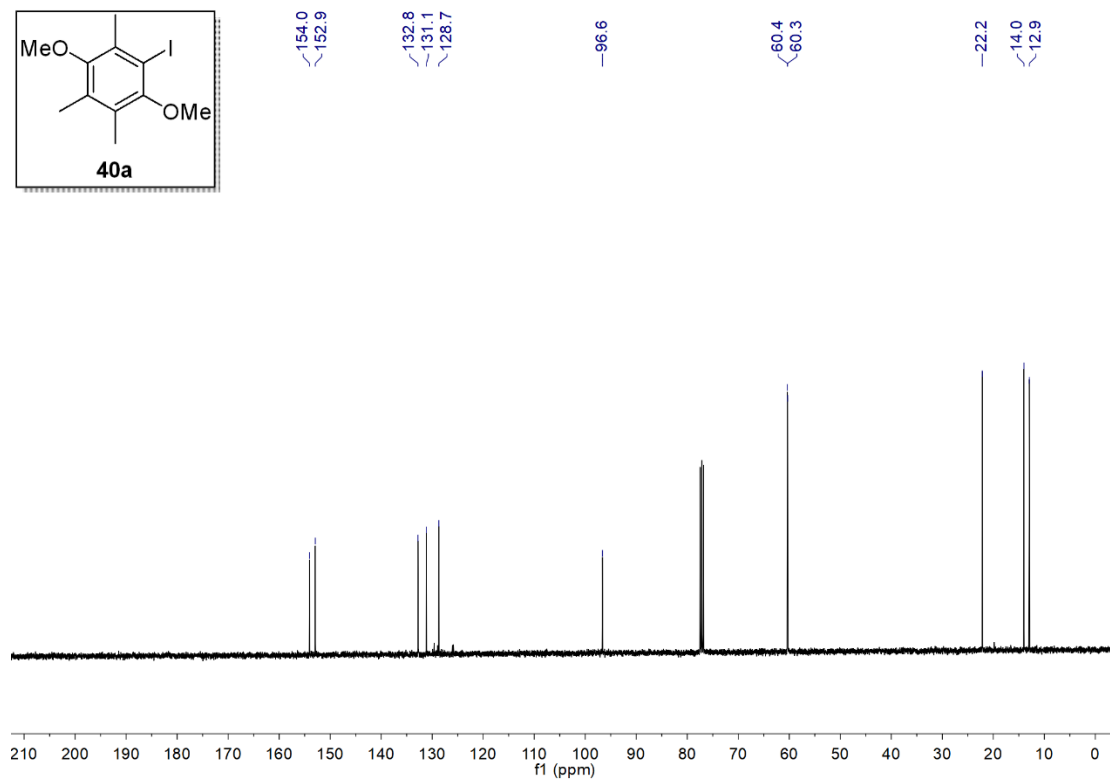

The  $^1\text{H}$  NMR (400 MHz,  $\text{CDCl}_3$ ) Spectrum of 40b

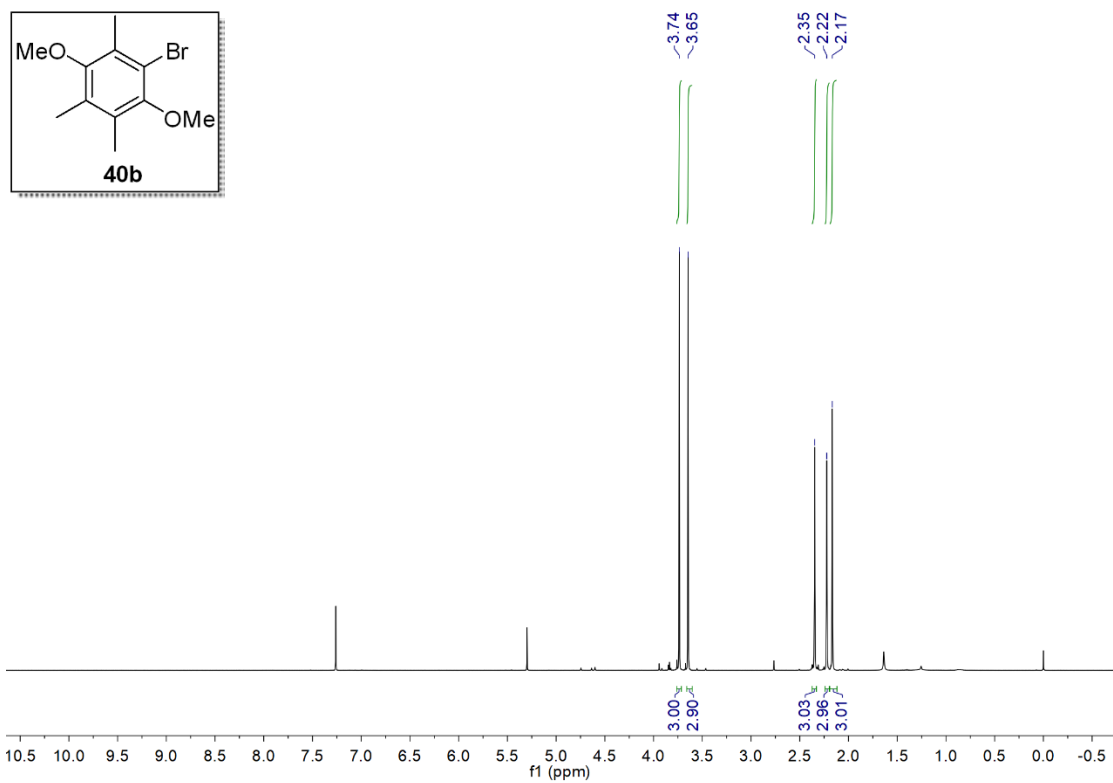

The  $^{13}\text{C}\{^1\text{H}\}$  NMR (100 MHz,  $\text{CDCl}_3$ ) Spectrum of 40b

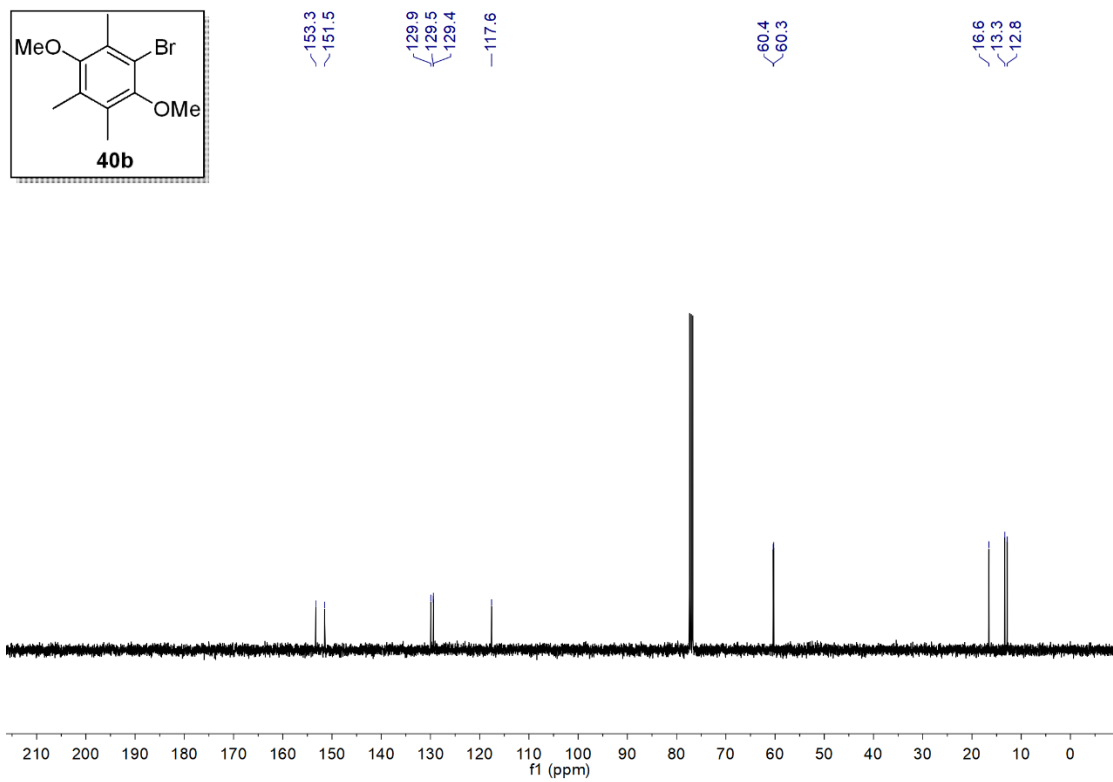

The  $^1\text{H}$  NMR (400 MHz,  $\text{CDCl}_3$ ) Spectrum of 41

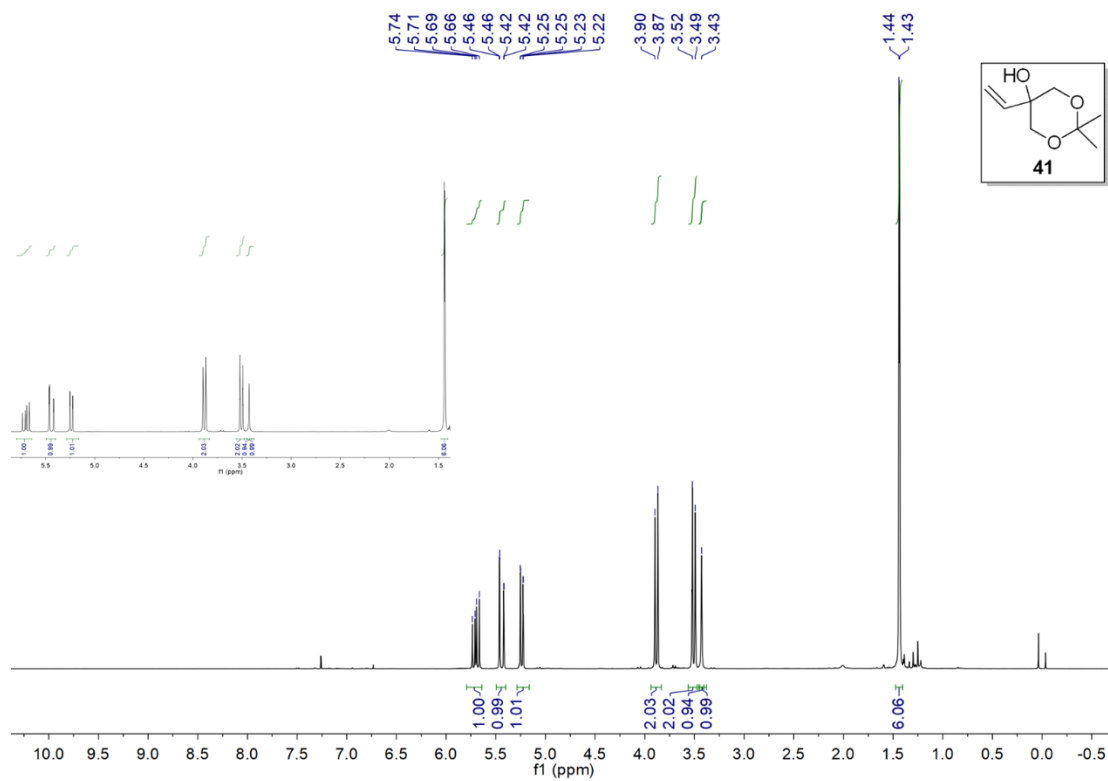

The  $^{13}\text{C}\{^1\text{H}\}$  NMR (100 MHz,  $\text{CDCl}_3$ ) Spectrum of 41

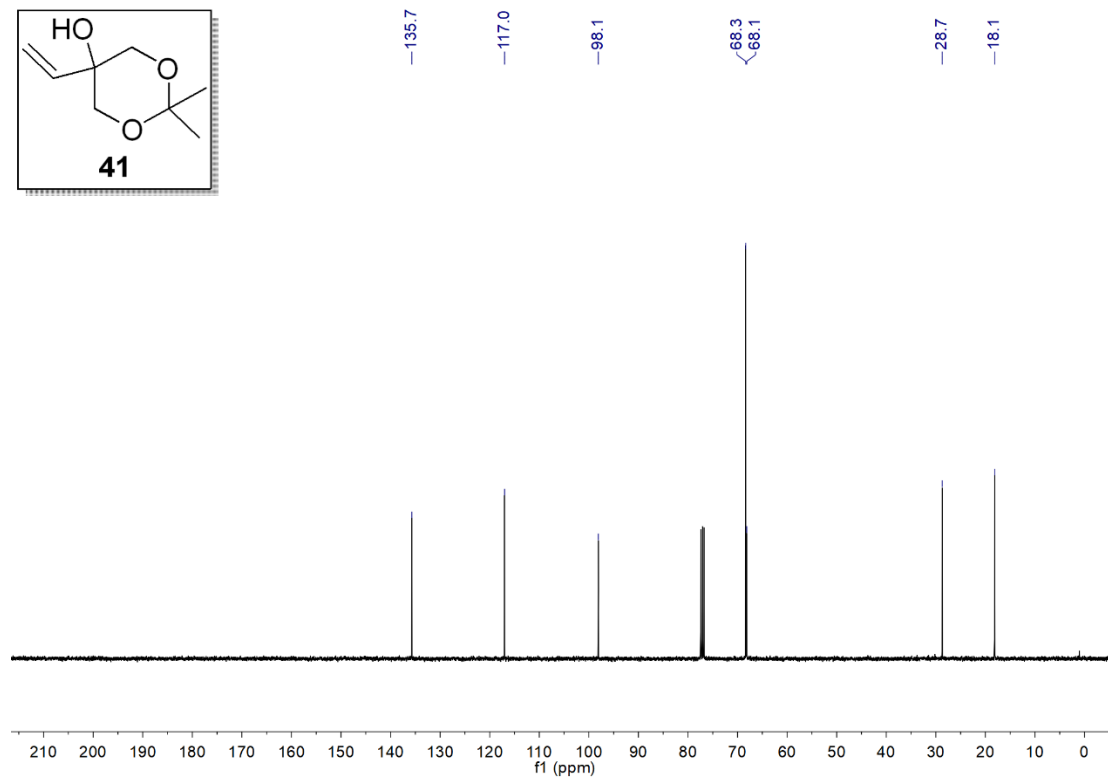



The  $^1\text{H}$  NMR (400 MHz,  $\text{CDCl}_3$ ) Spectrum of 45

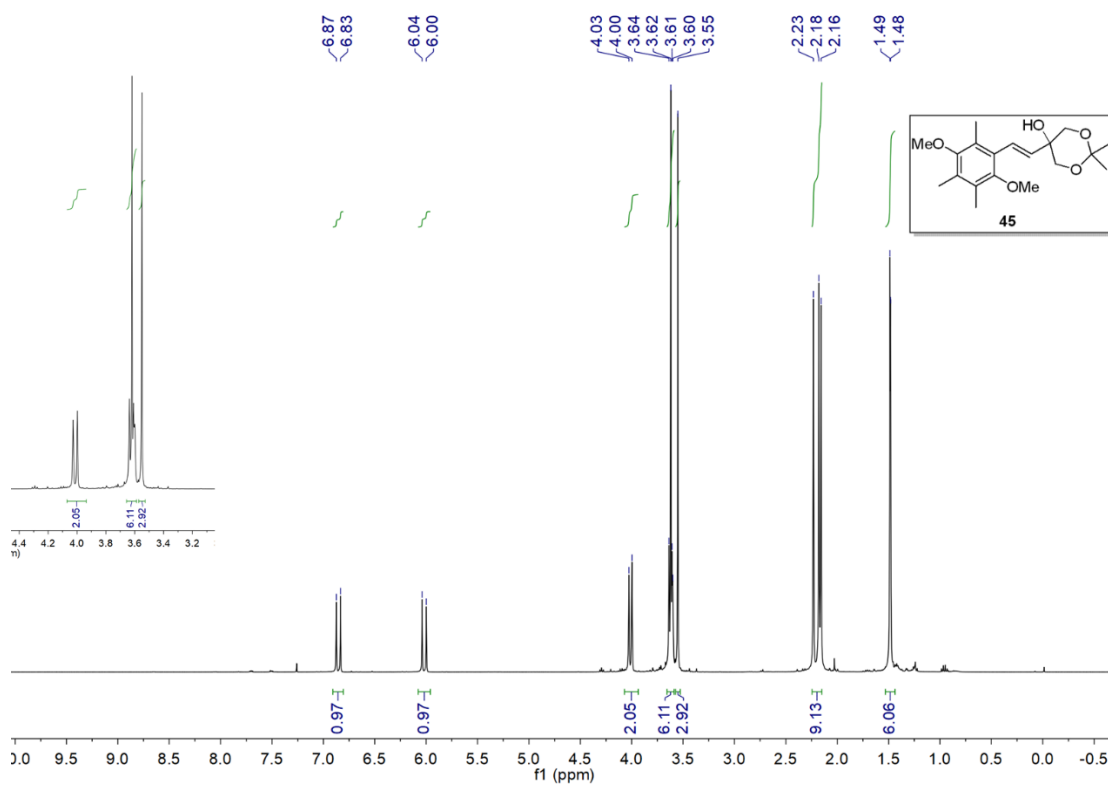

The  $^{13}\text{C}\{^1\text{H}\}$  NMR (100 MHz,  $\text{CDCl}_3$ ) Spectrum of 45

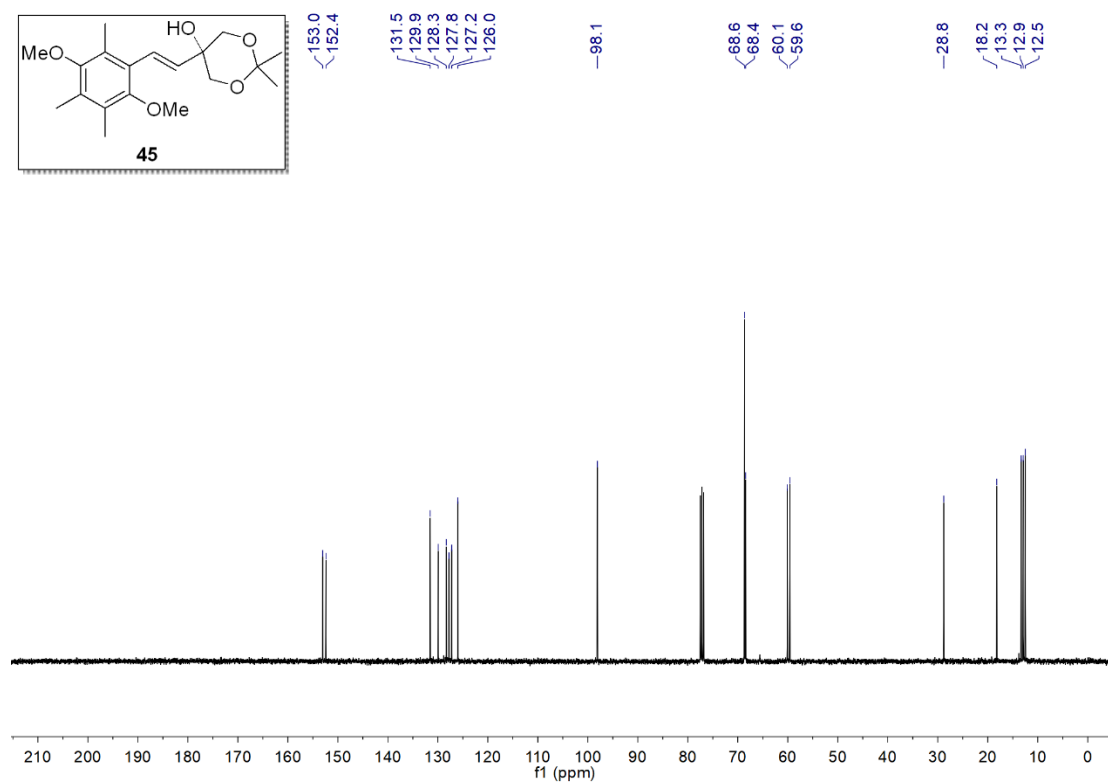

The  $^1\text{H}$  NMR (400 MHz,  $\text{CDCl}_3$ ) Spectrum of 46

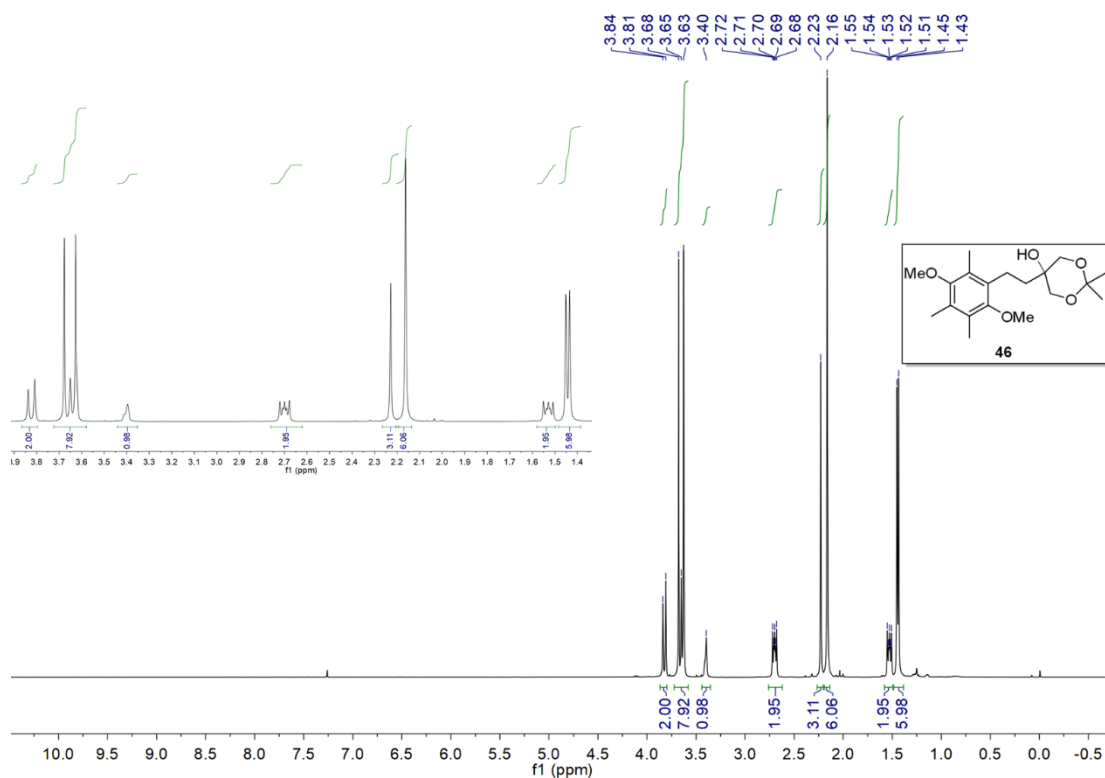

The  $^{13}\text{C}\{^1\text{H}\}$  NMR (100 MHz,  $\text{CDCl}_3$ ) Spectrum of 46

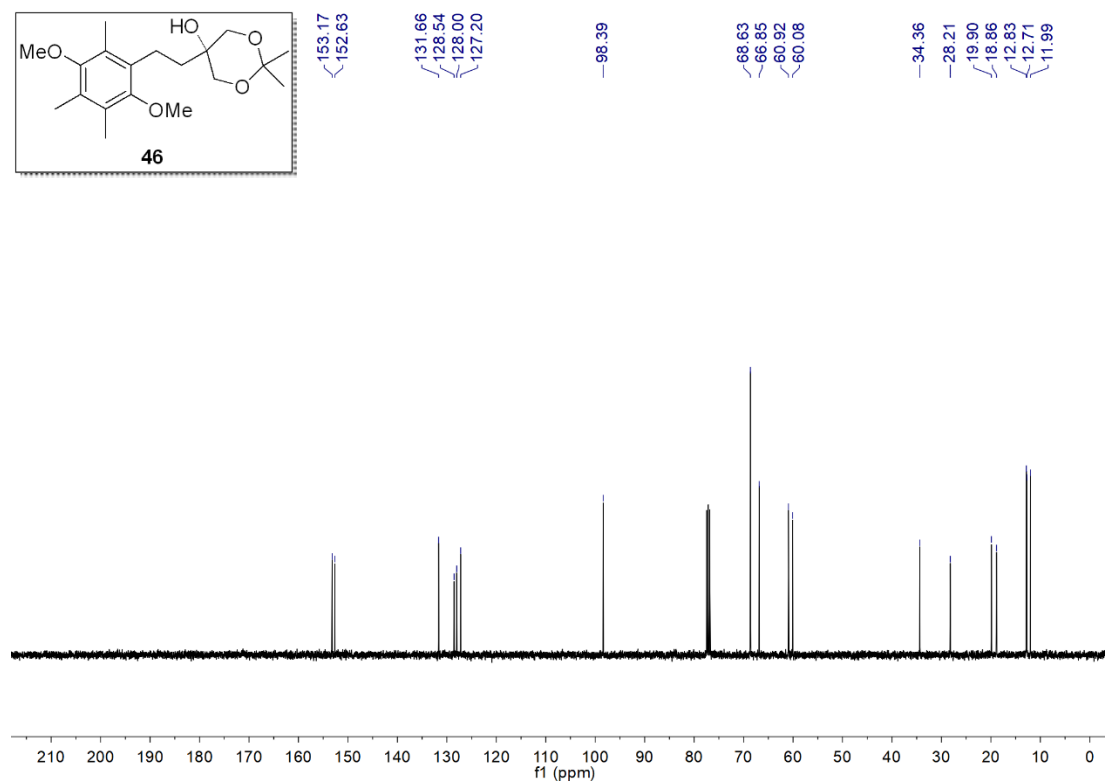

The  $^1\text{H}$  NMR (400 MHz,  $\text{CDCl}_3$ ) Spectrum of 38

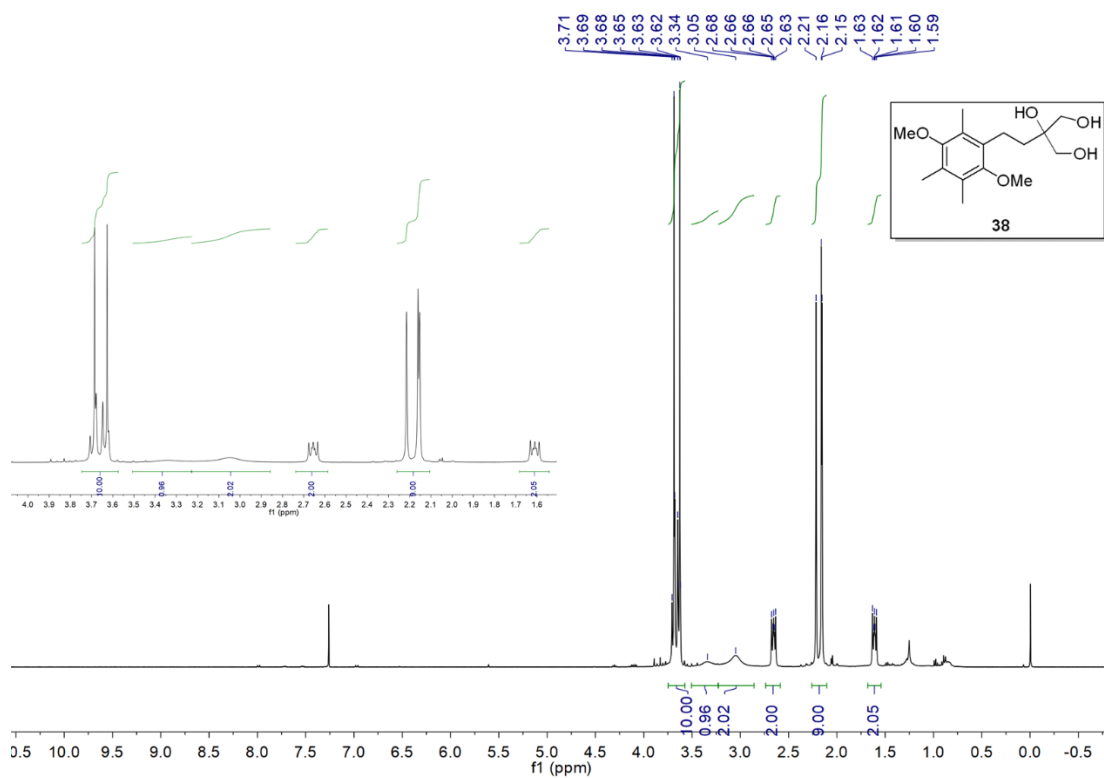

The  $^{13}\text{C}\{^1\text{H}\}$  NMR (100 MHz,  $\text{CDCl}_3$ ) Spectrum of 38

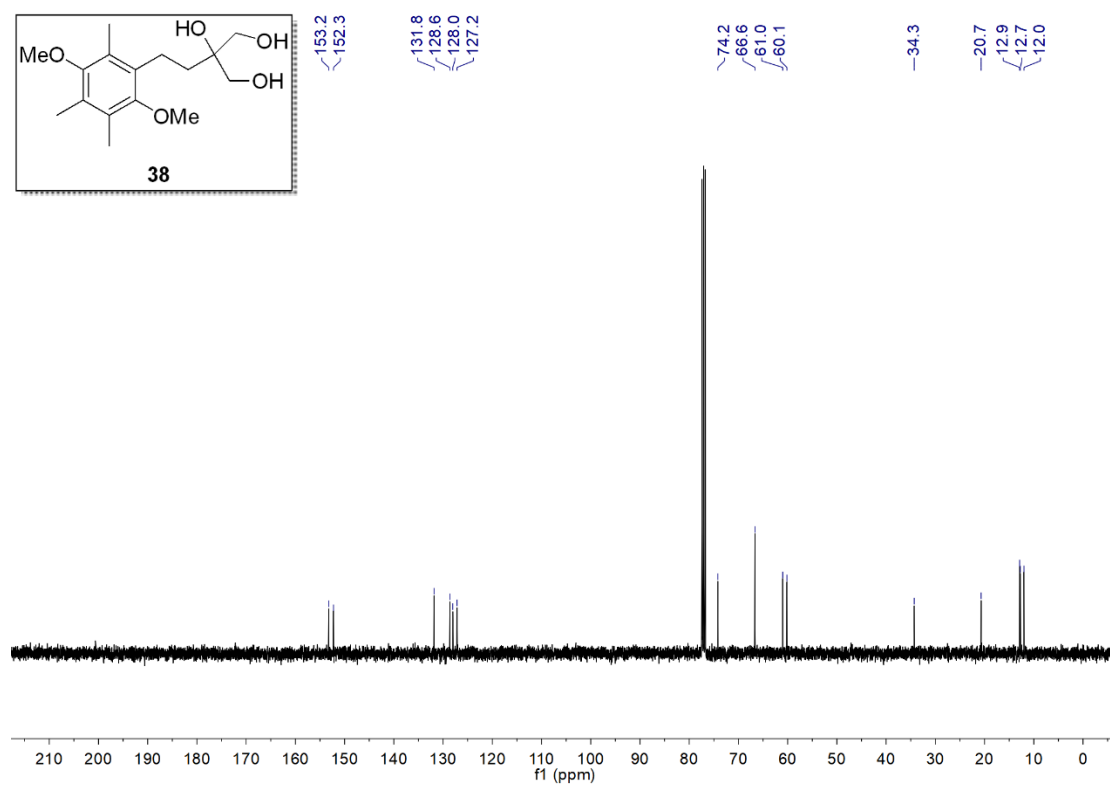

The  $^1\text{H}$  NMR (400 MHz,  $\text{CDCl}_3$ ) Spectrum of (*S*)-37a

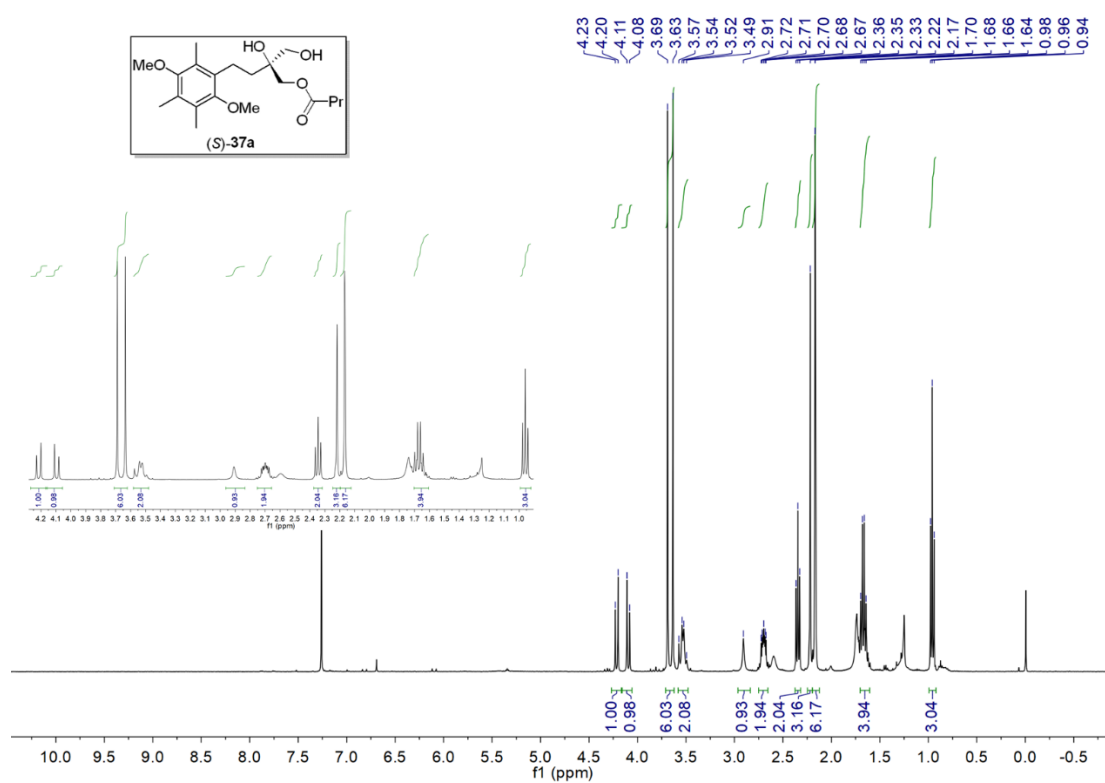

The  $^{13}\text{C}\{^1\text{H}\}$  NMR (100 MHz,  $\text{CDCl}_3$ ) Spectrum of (*S*)-37a

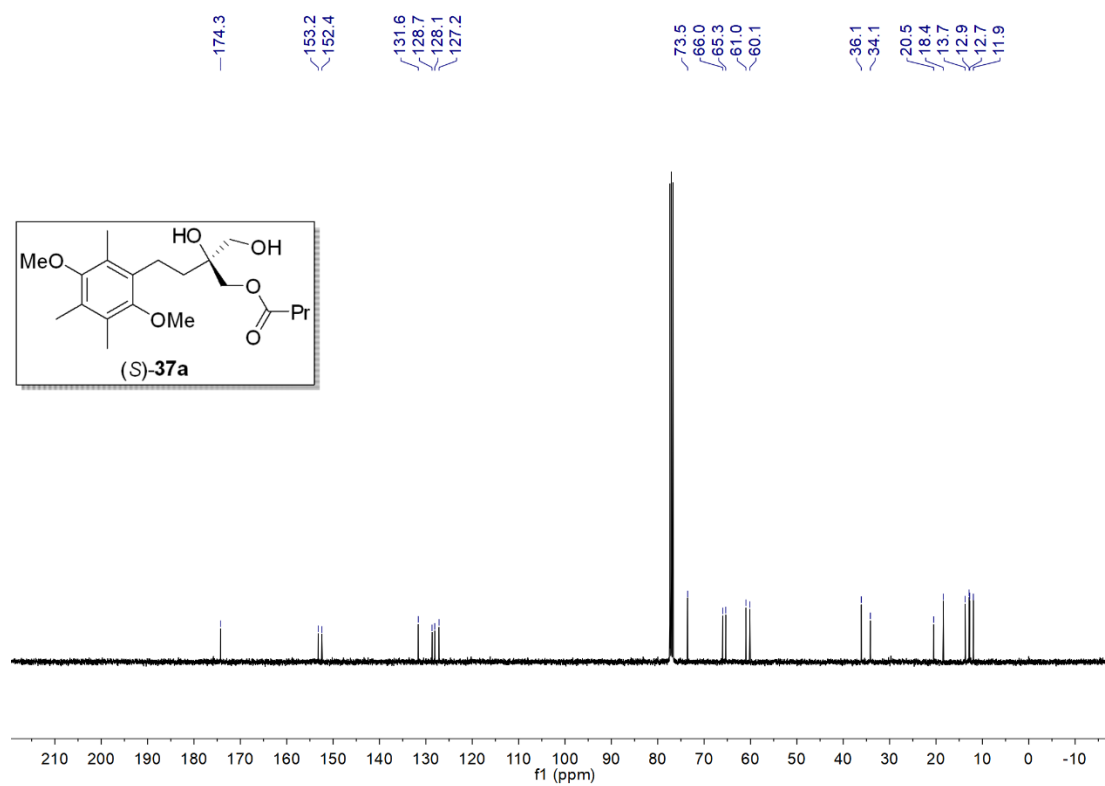

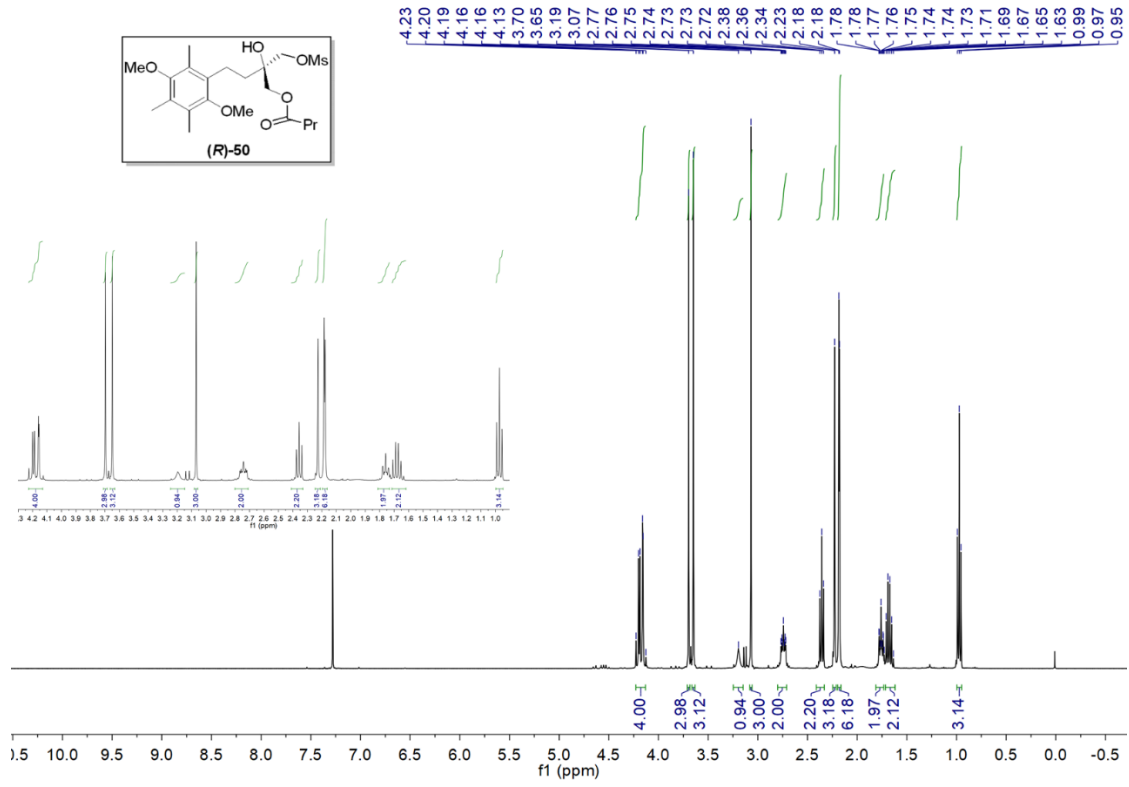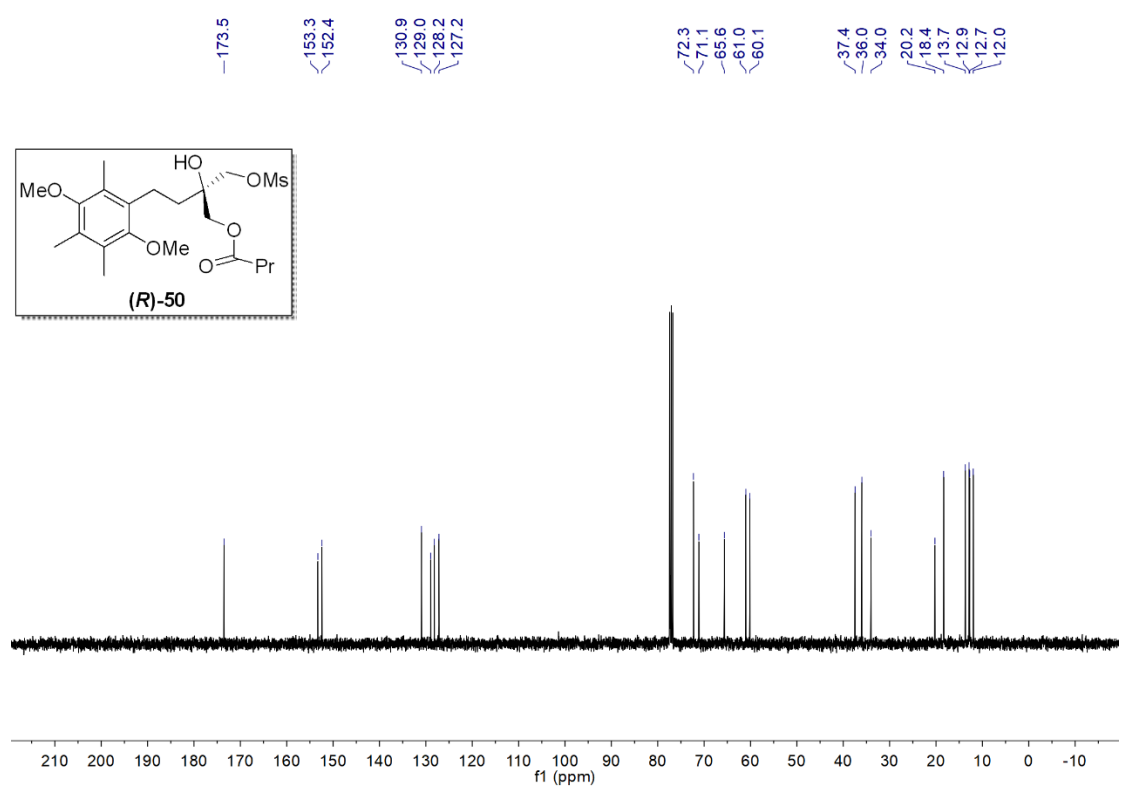

The  $^1\text{H}$  NMR (400 MHz,  $\text{CDCl}_3$ ) Spectrum of (*R*)-14

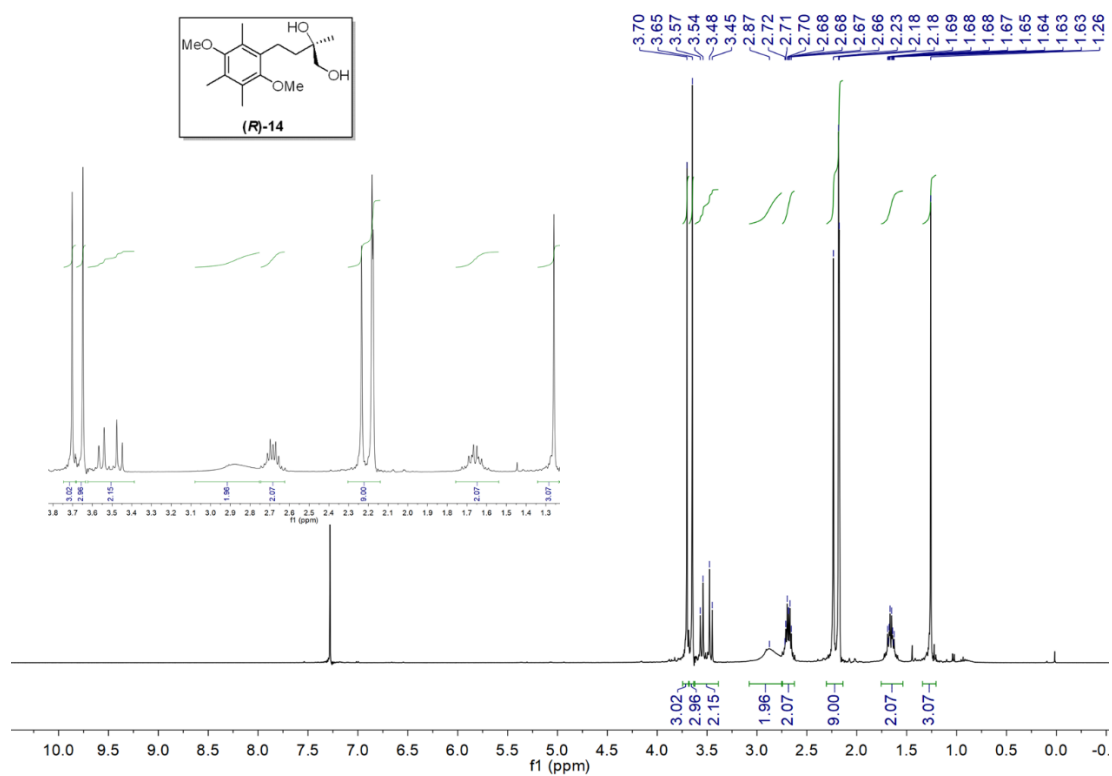

The  $^{13}\text{C}\{^1\text{H}\}$  NMR (100 MHz,  $\text{CDCl}_3$ ) Spectrum of (*R*)-14

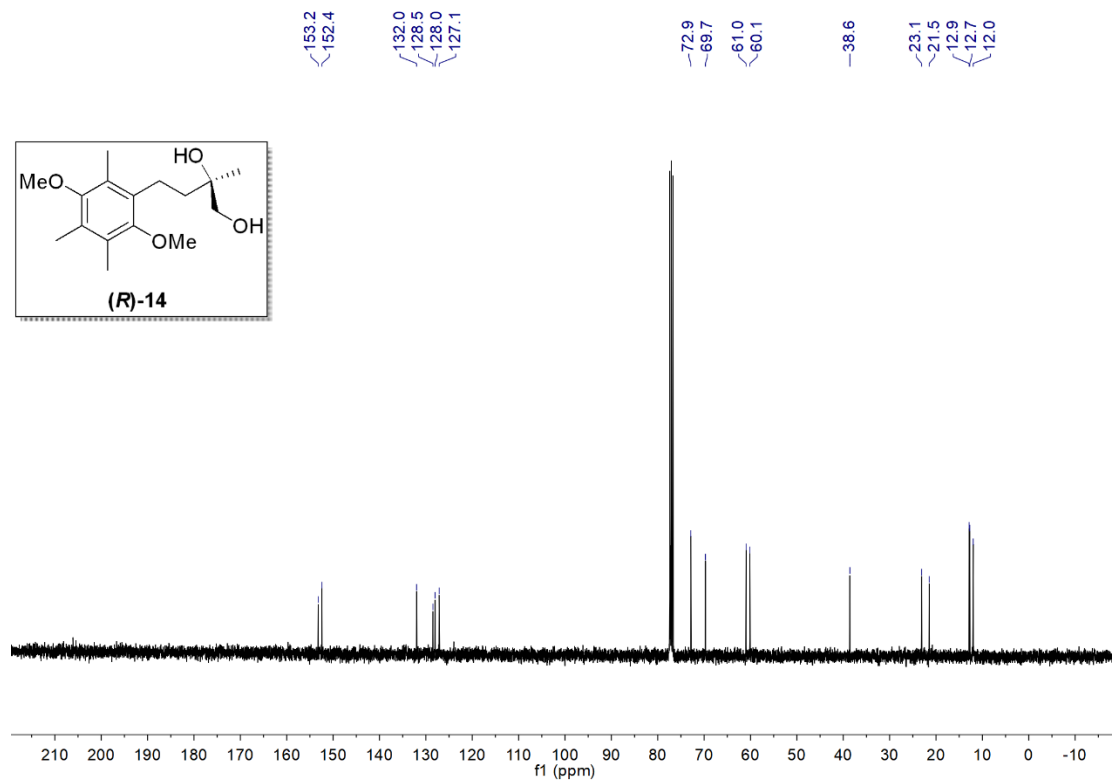

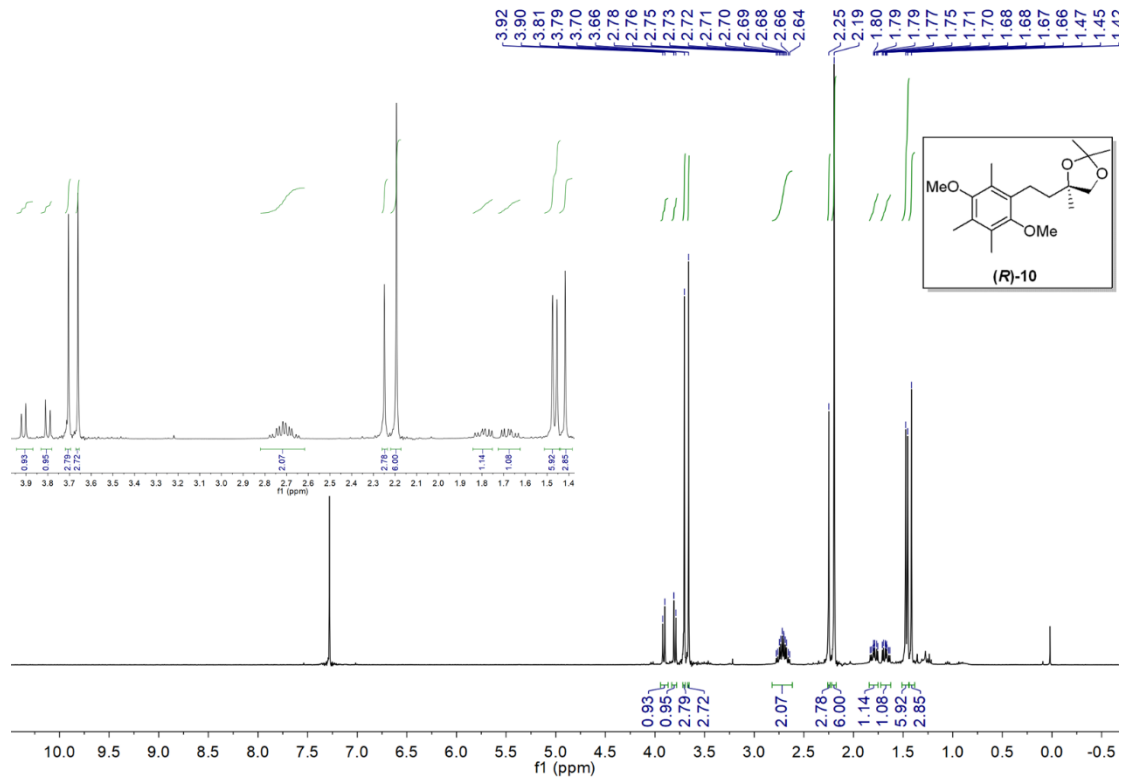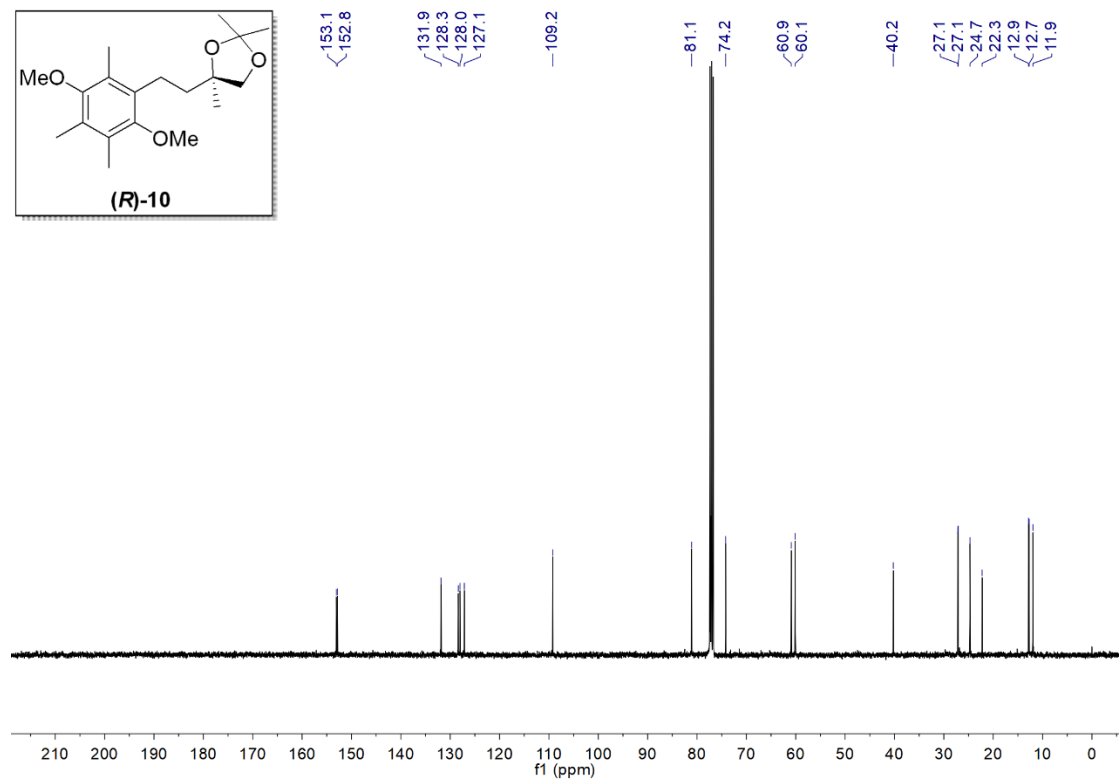

The  $^1\text{H}$  NMR (400 MHz,  $\text{CDCl}_3$ ) Spectrum of (*R*)-5

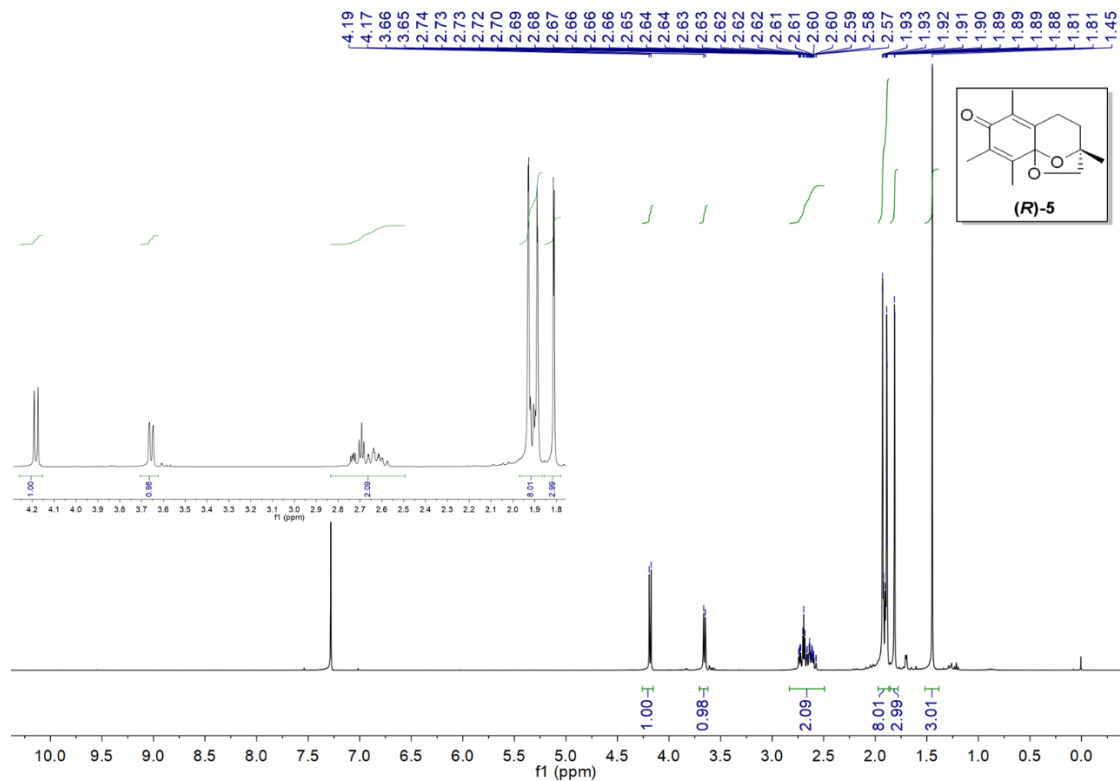

The  $^{13}\text{C}\{^1\text{H}\}$  NMR (100 MHz,  $\text{CDCl}_3$ ) Spectrum of (*R*)-5

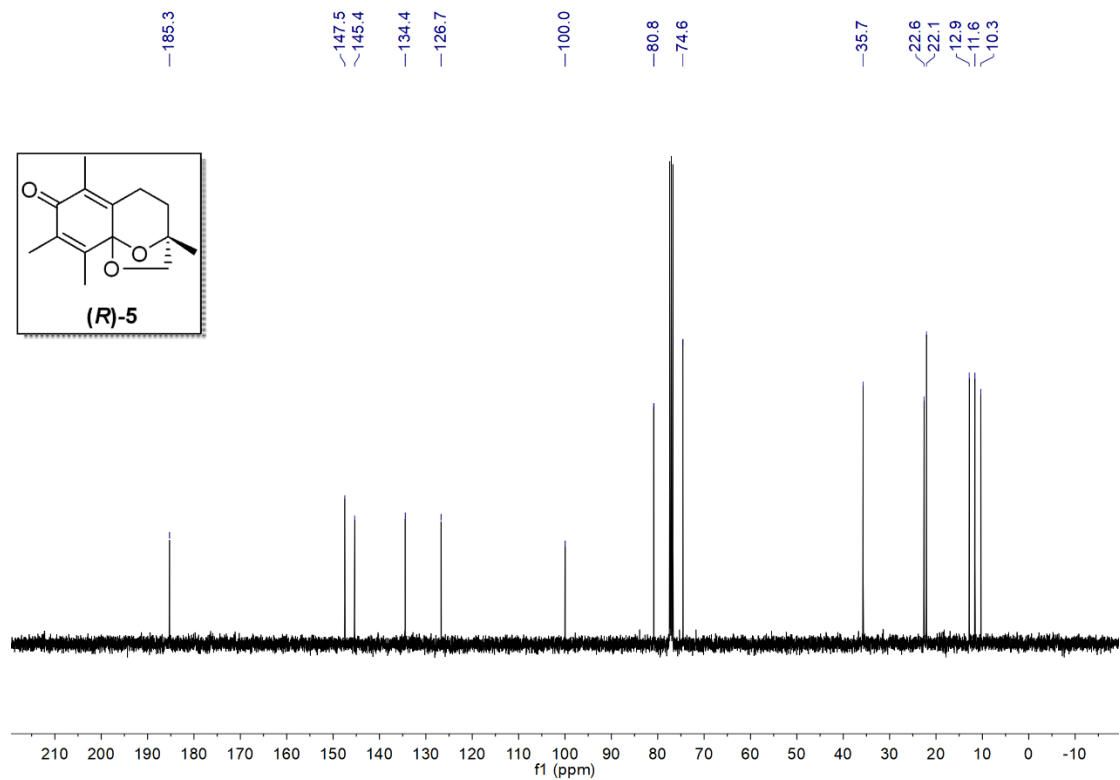



The  $^1\text{H}$  NMR (400 MHz,  $\text{CDCl}_3$ ) Spectrum of **39a**

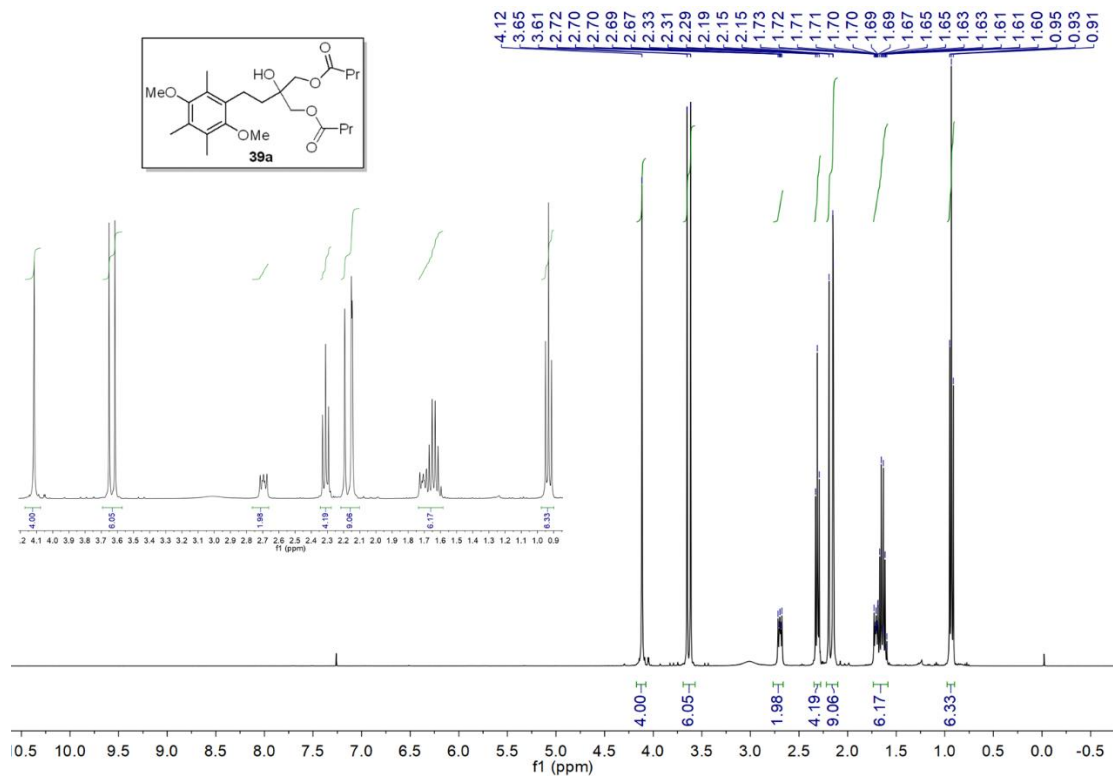

The  $^{13}\text{C}\{^1\text{H}\}$  NMR (100 MHz,  $\text{CDCl}_3$ ) Spectrum of **39a**

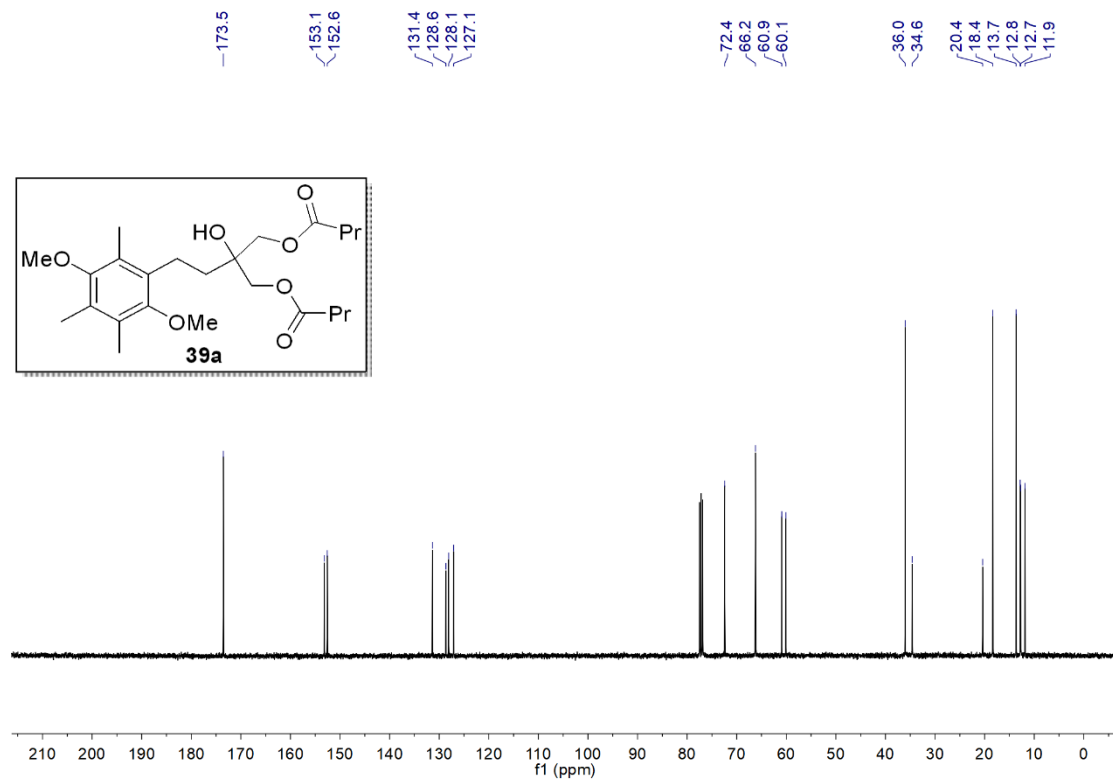

The  $^1\text{H}$  NMR (400 MHz,  $\text{CDCl}_3$ ) Spectrum of 48

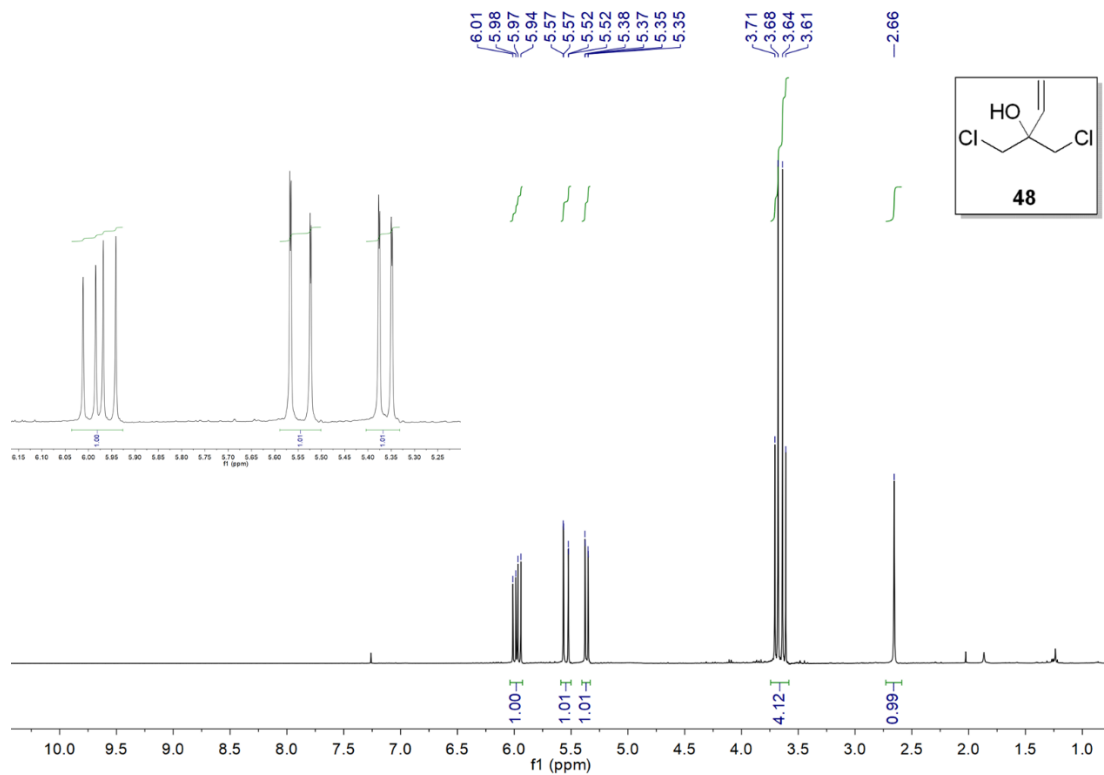

The  $^{13}\text{C}\{^1\text{H}\}$  NMR (100 MHz,  $\text{CDCl}_3$ ) Spectrum of 48

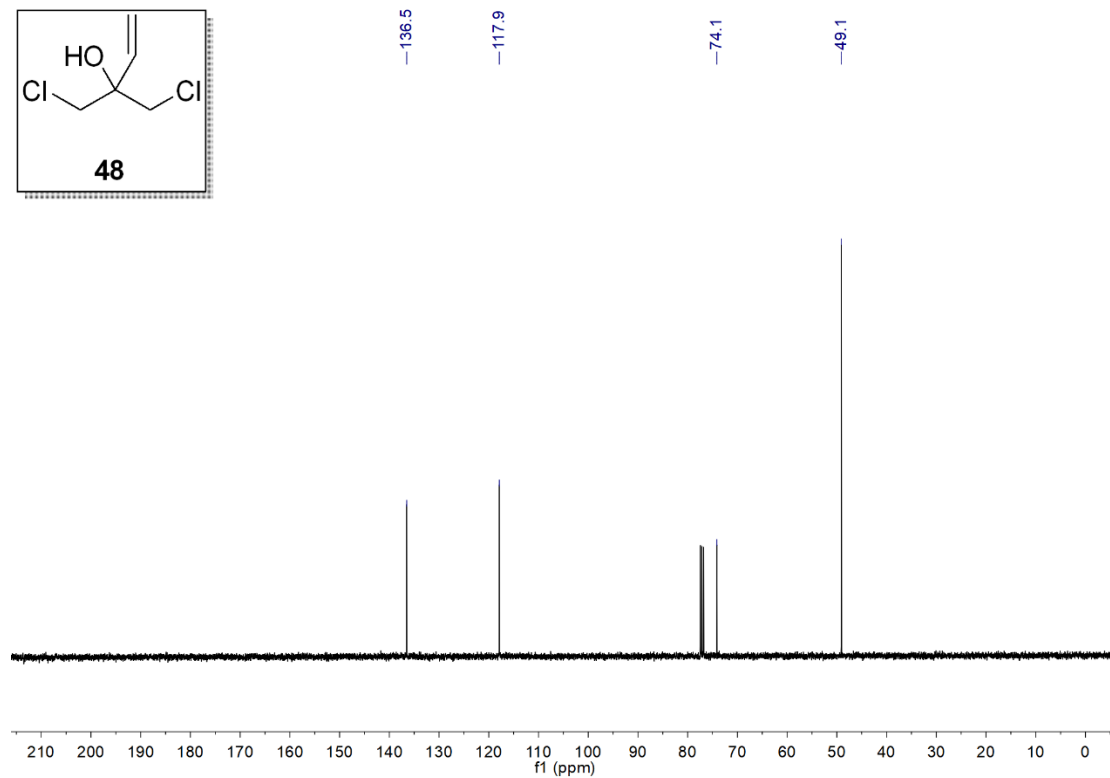

The  $^1\text{H}$  NMR (400 MHz,  $\text{CDCl}_3$ ) Spectrum of 42a

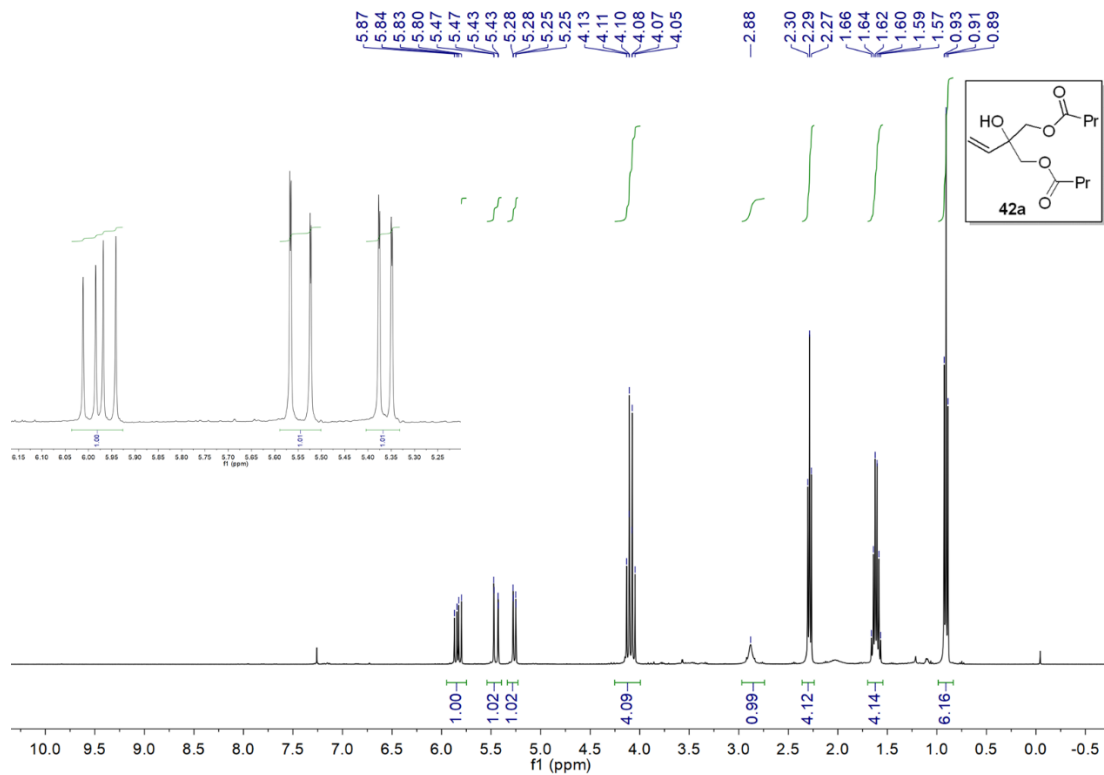

The  $^{13}\text{C}\{^1\text{H}\}$  NMR (100 MHz,  $\text{CDCl}_3$ ) Spectrum of 42a

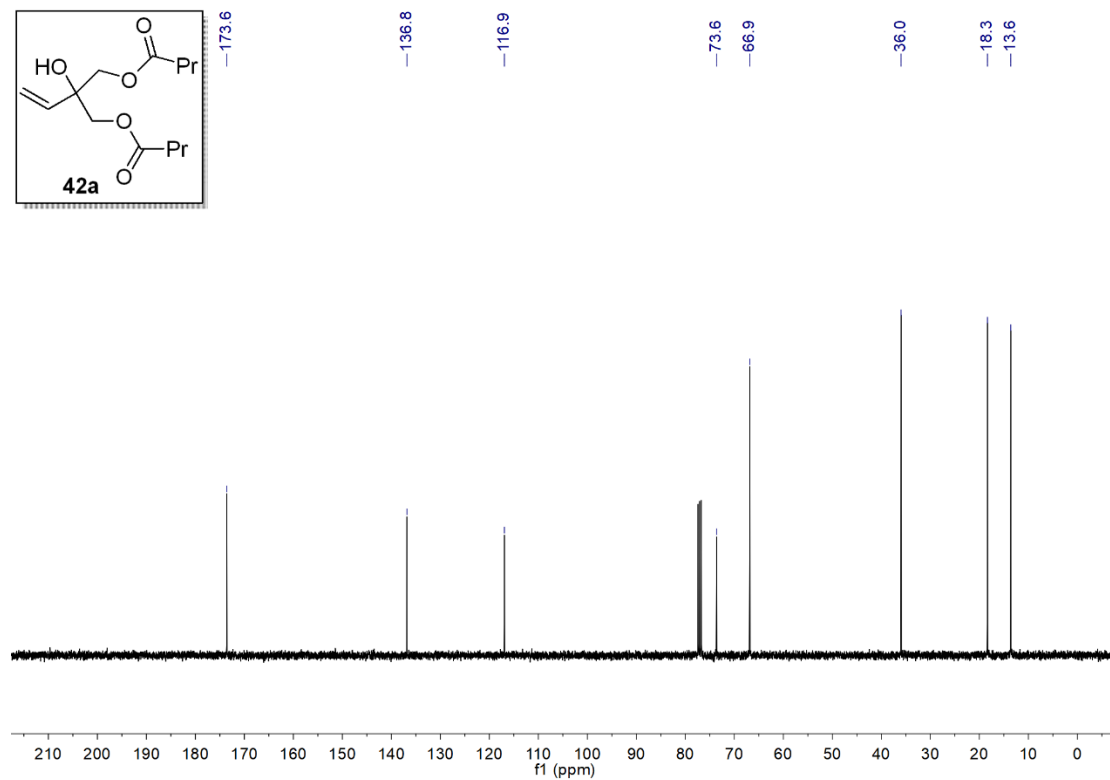

The  $^1\text{H}$  NMR (400 MHz,  $\text{CDCl}_3$ ) Spectrum of 49

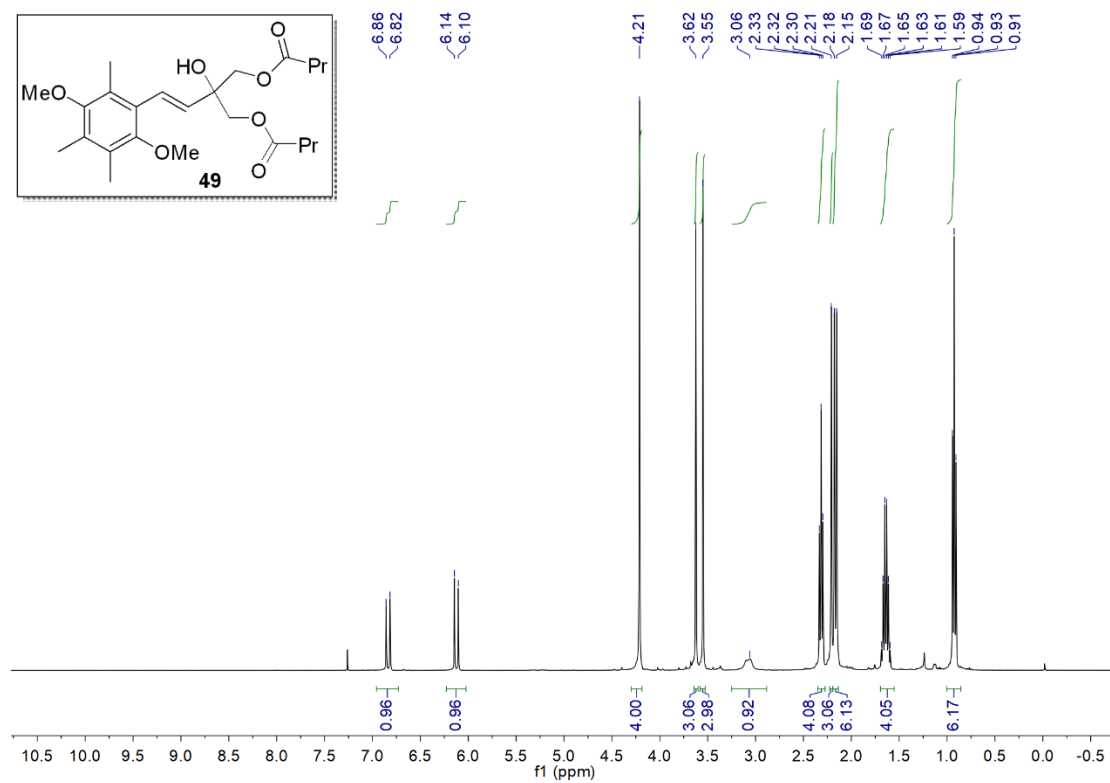

The  $^{13}\text{C}\{^1\text{H}\}$  NMR (100 MHz,  $\text{CDCl}_3$ ) Spectrum of 49

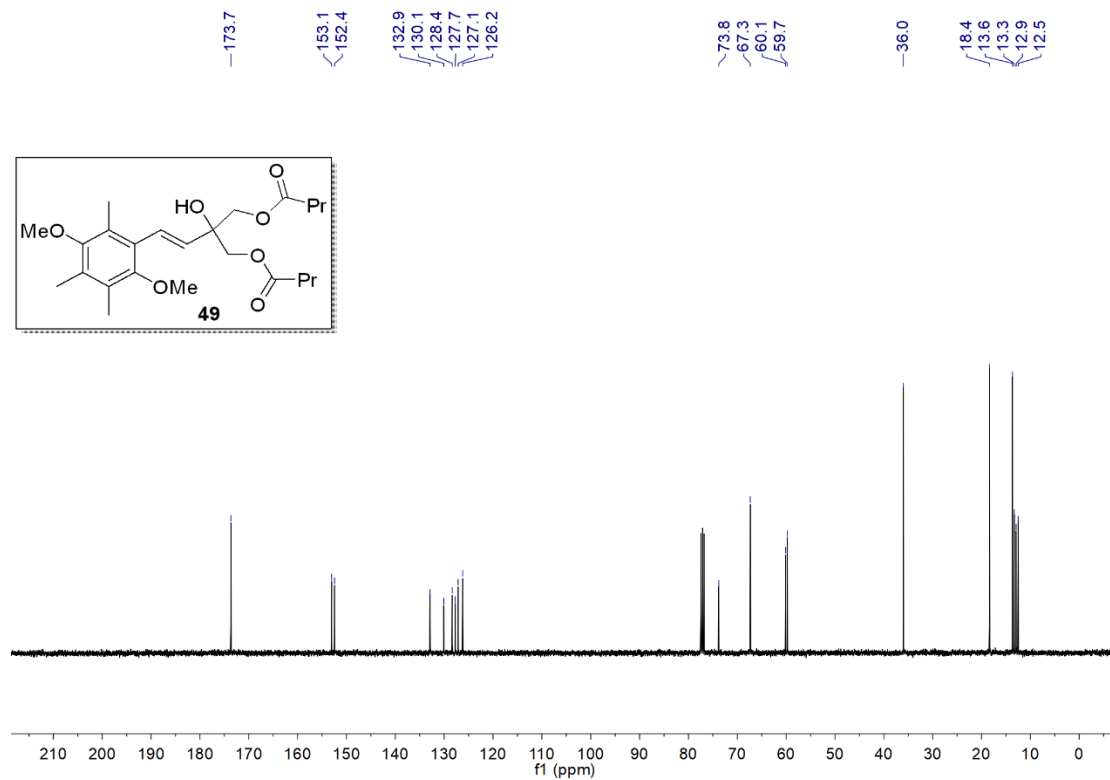

The  $^1\text{H}$  NMR (400 MHz,  $\text{CDCl}_3$ ) Spectrum of (*R*)-37a

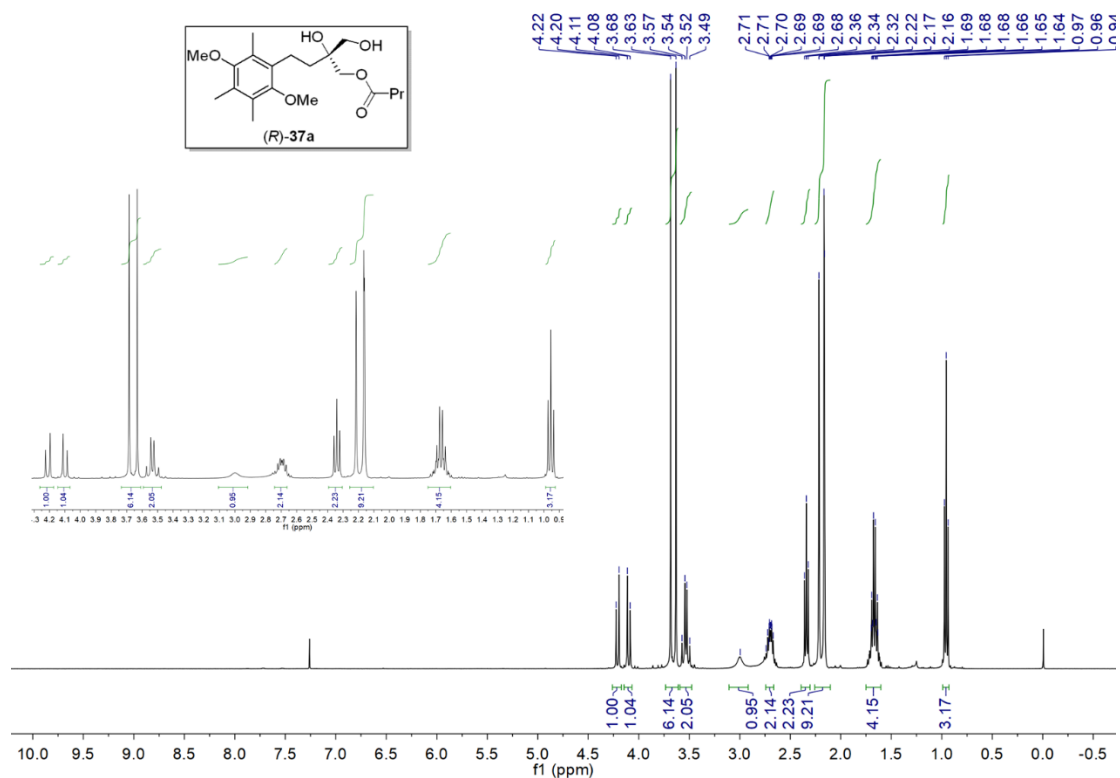

The  $^{13}\text{C}\{^1\text{H}\}$  NMR (100 MHz,  $\text{CDCl}_3$ ) Spectrum of (*R*)-37a

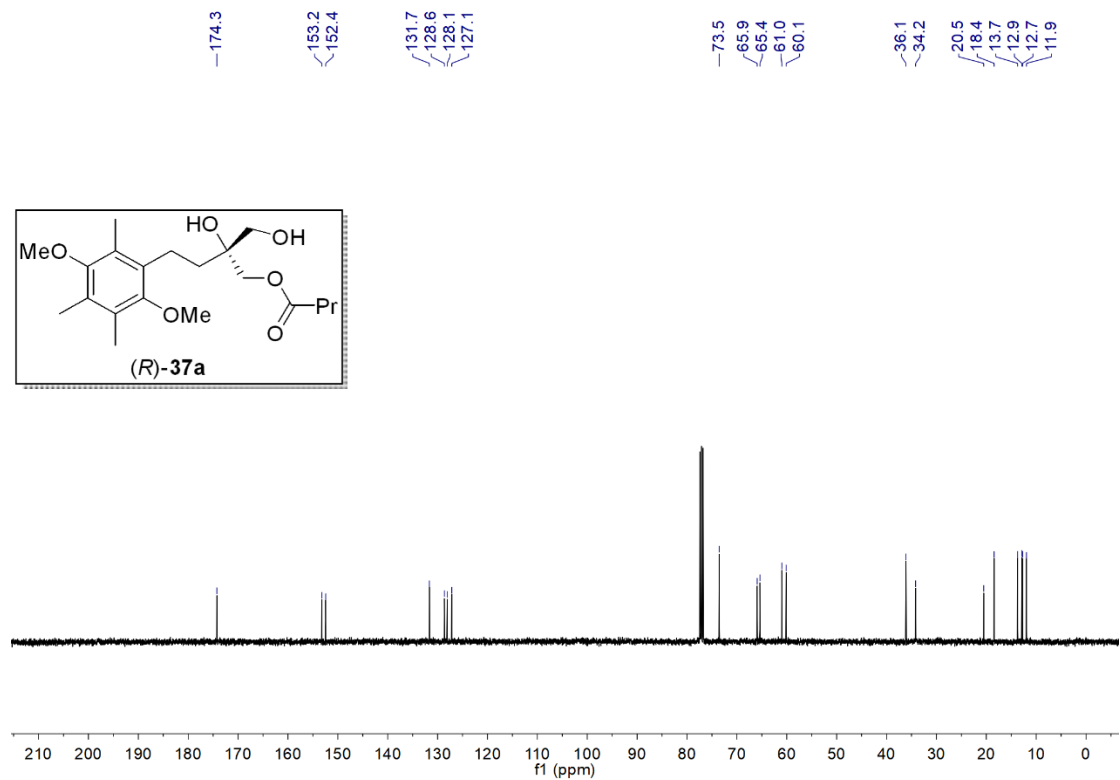

The  $^1\text{H}$  NMR (400 MHz,  $\text{CDCl}_3$ ) Spectrum of (S)-50

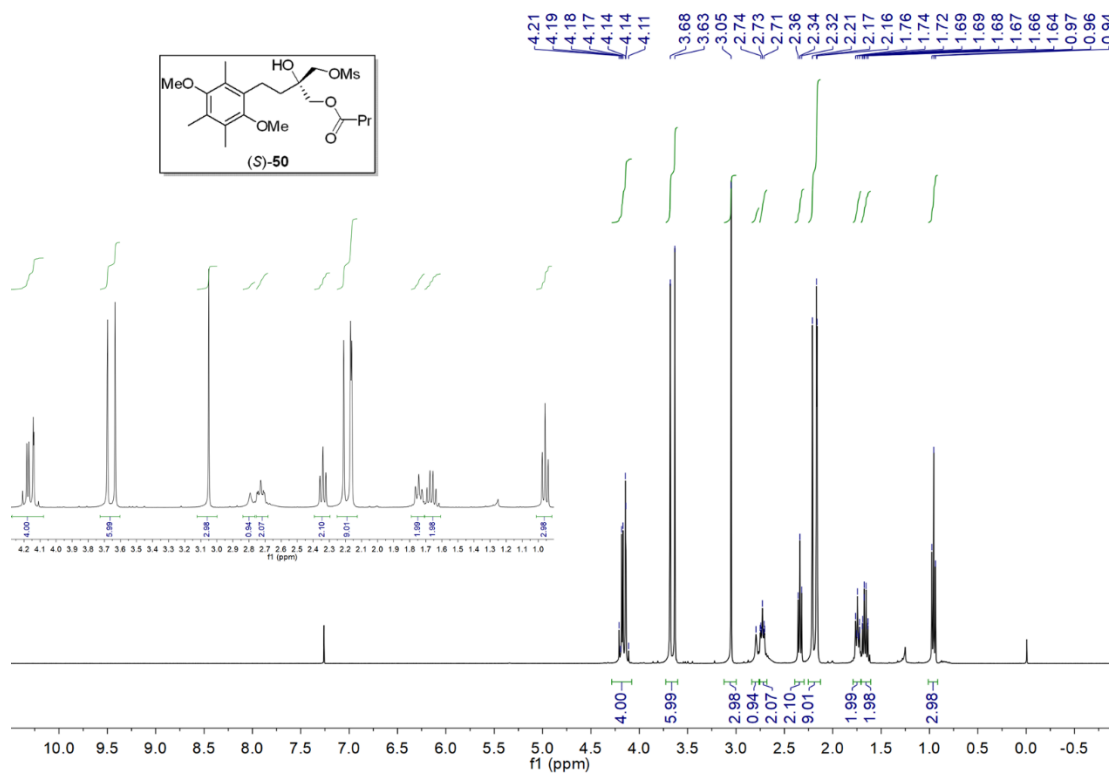

The  $^{13}\text{C}\{^1\text{H}\}$  NMR (100 MHz,  $\text{CDCl}_3$ ) Spectrum of (S)-50

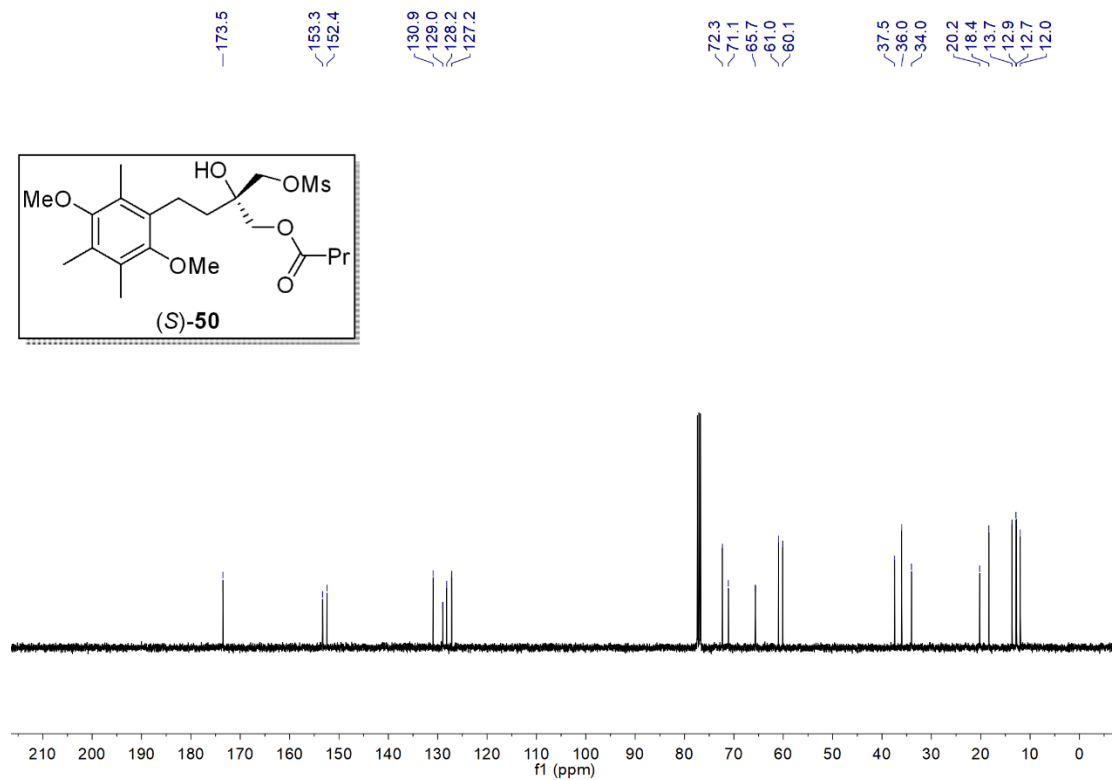

The  $^1\text{H}$  NMR (400 MHz,  $\text{CDCl}_3$ ) Spectrum of (S)-14

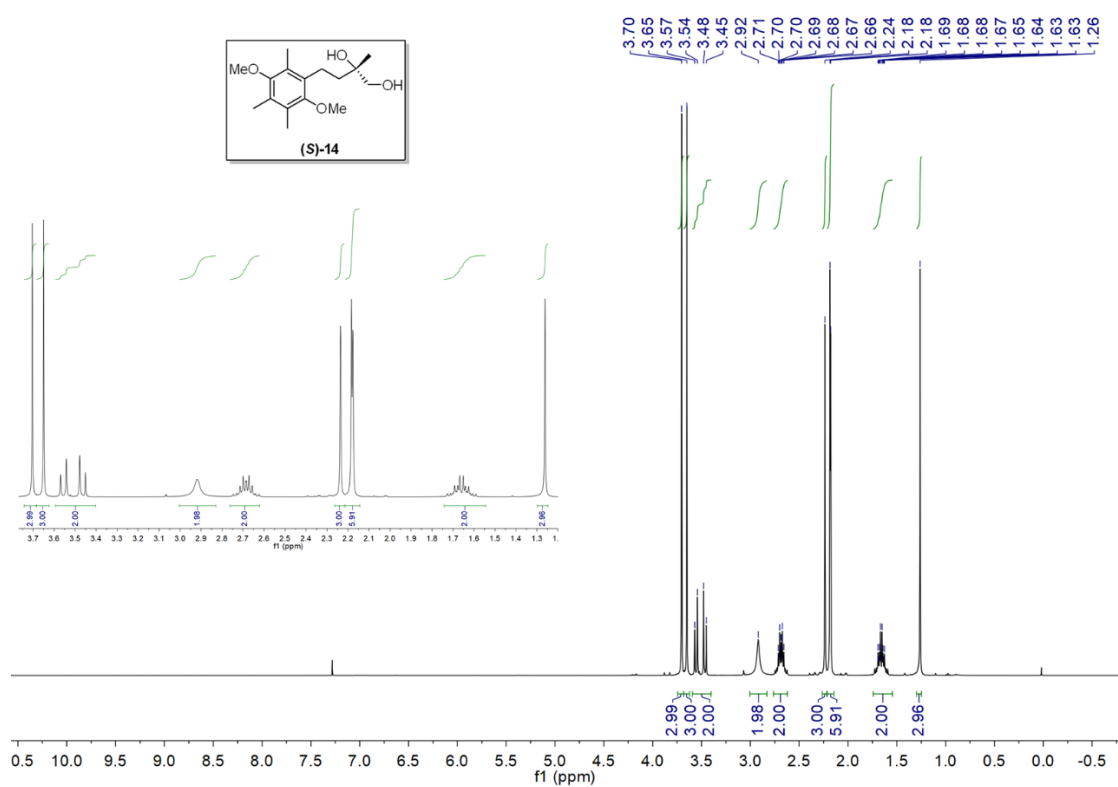

The  $^{13}\text{C}\{^1\text{H}\}$  NMR (100 MHz,  $\text{CDCl}_3$ ) Spectrum of (S)-14

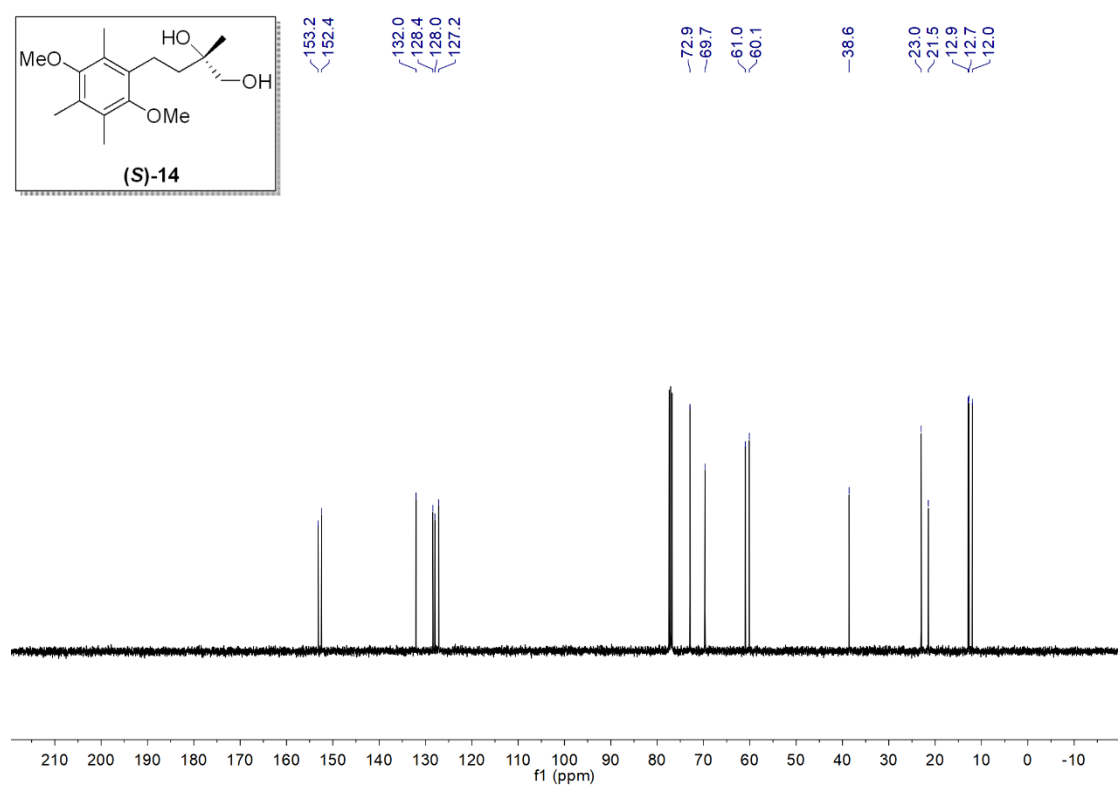

The  $^1\text{H}$  NMR (400 MHz,  $\text{CDCl}_3$ ) Spectrum of (S)-10

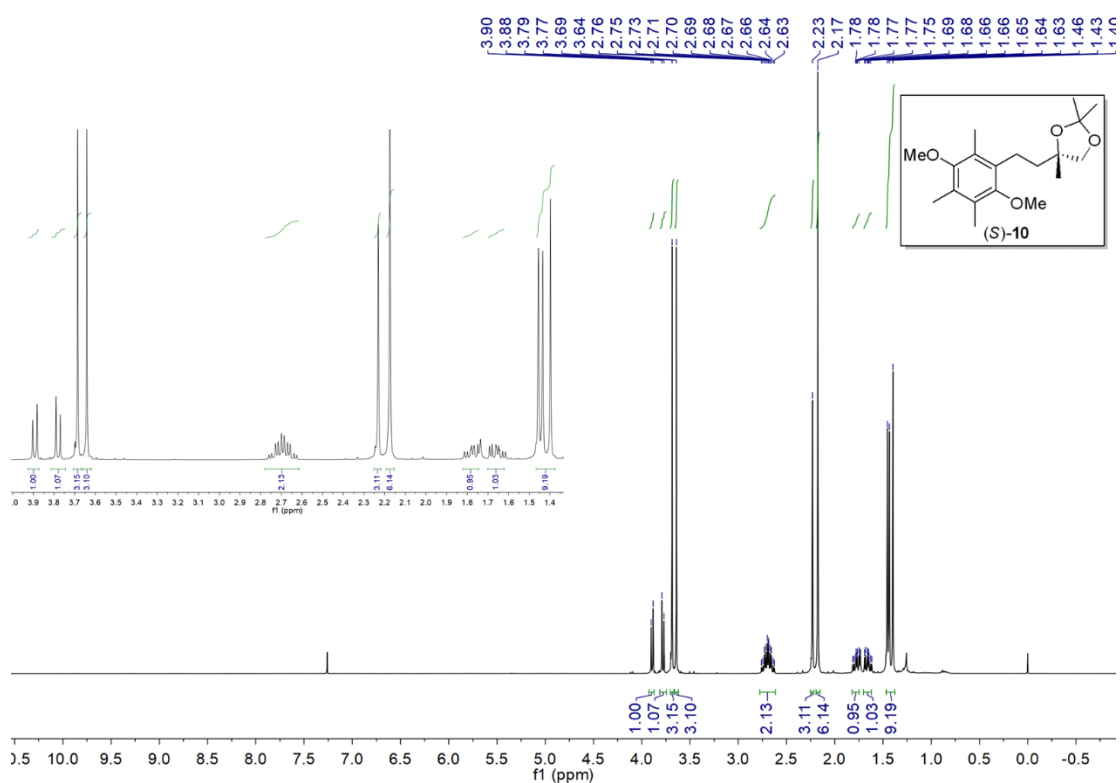

The  $^{13}\text{C}\{^1\text{H}\}$  NMR (100 MHz,  $\text{CDCl}_3$ ) Spectrum of (S)-10

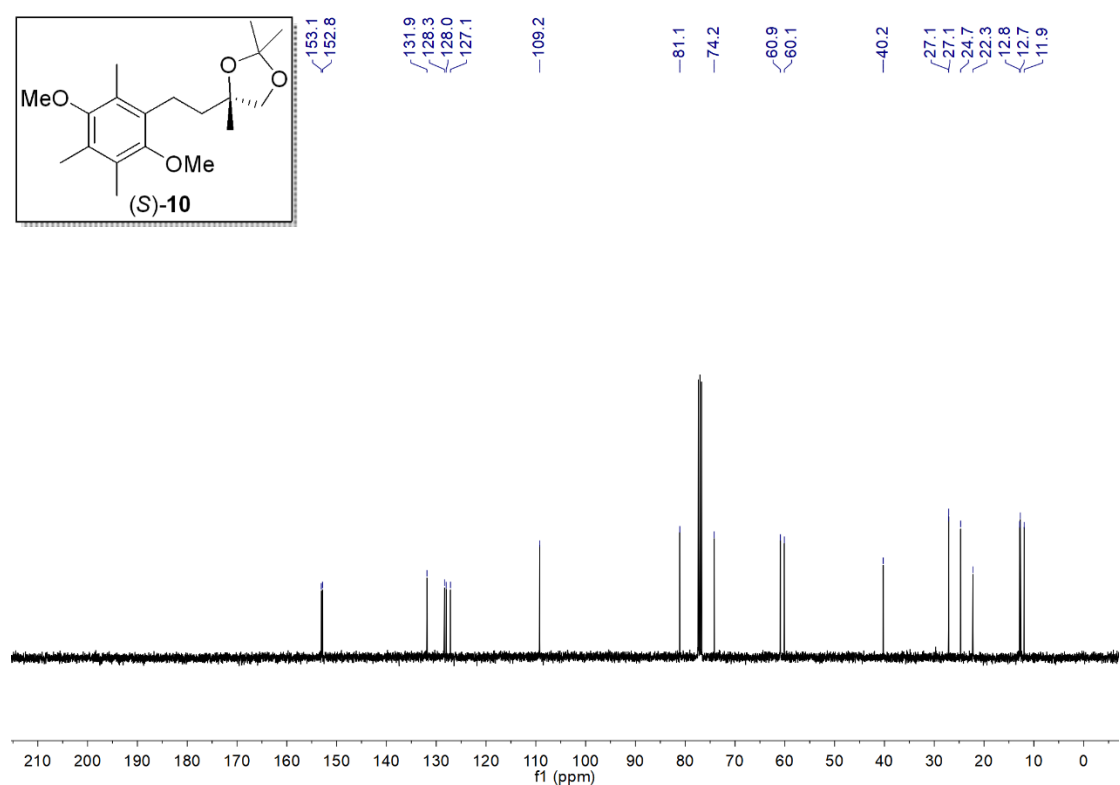



The  $^1\text{H}$  NMR (400 MHz,  $\text{CDCl}_3$ ) Spectrum of (S)-5

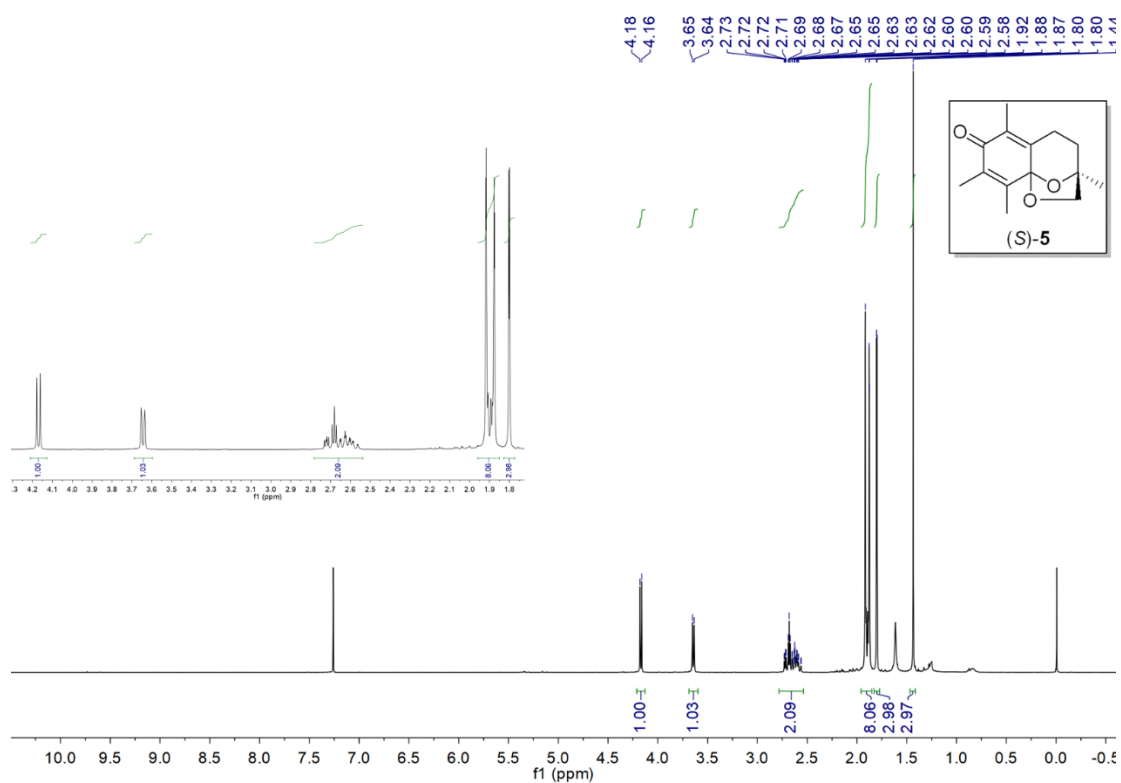

The  $^{13}\text{C}\{^1\text{H}\}$  NMR (100 MHz,  $\text{CDCl}_3$ ) Spectrum of (S)-5

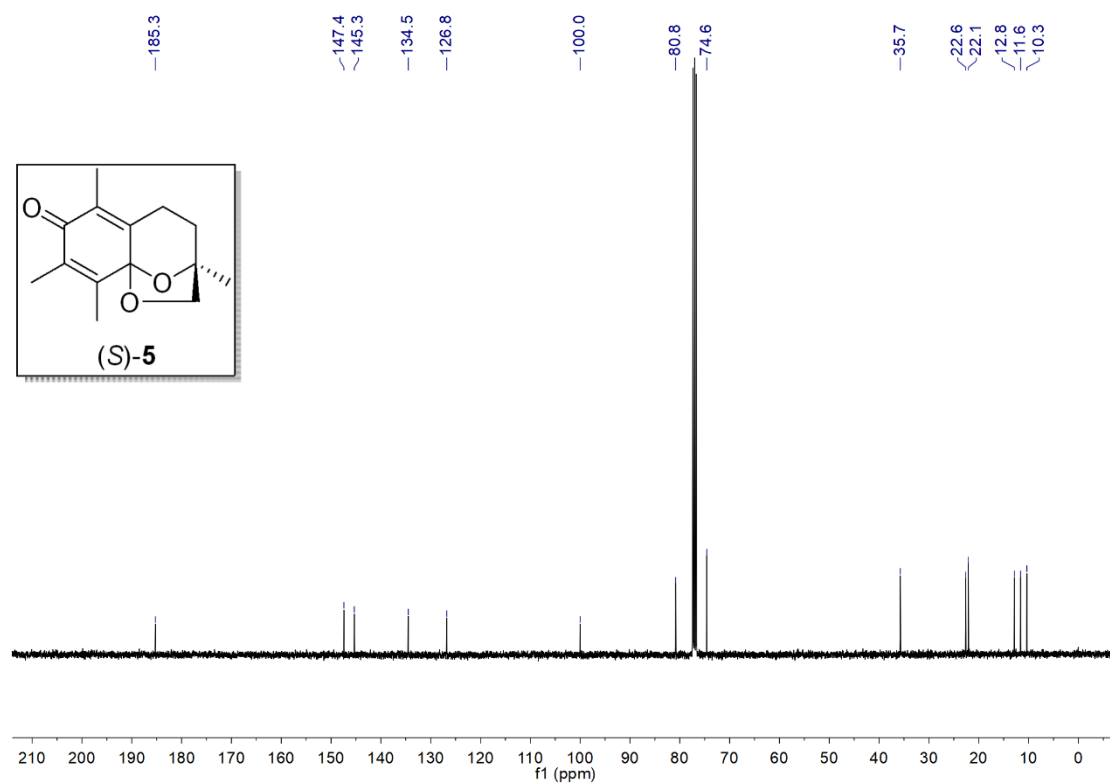

The  $^1\text{H}$  NMR (400 MHz,  $\text{CDCl}_3$ ) Spectrum of (S)-6

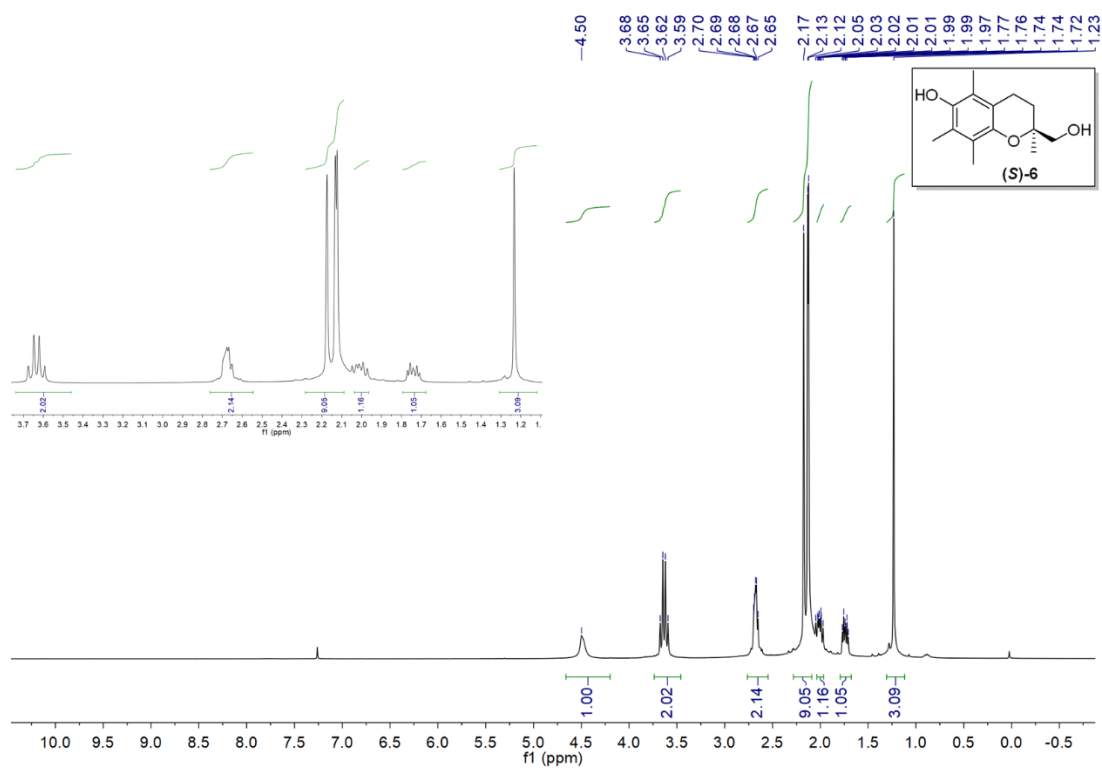

The  $^{13}\text{C}\{^1\text{H}\}$  NMR (100 MHz,  $\text{CDCl}_3$ ) Spectrum of (S)-6

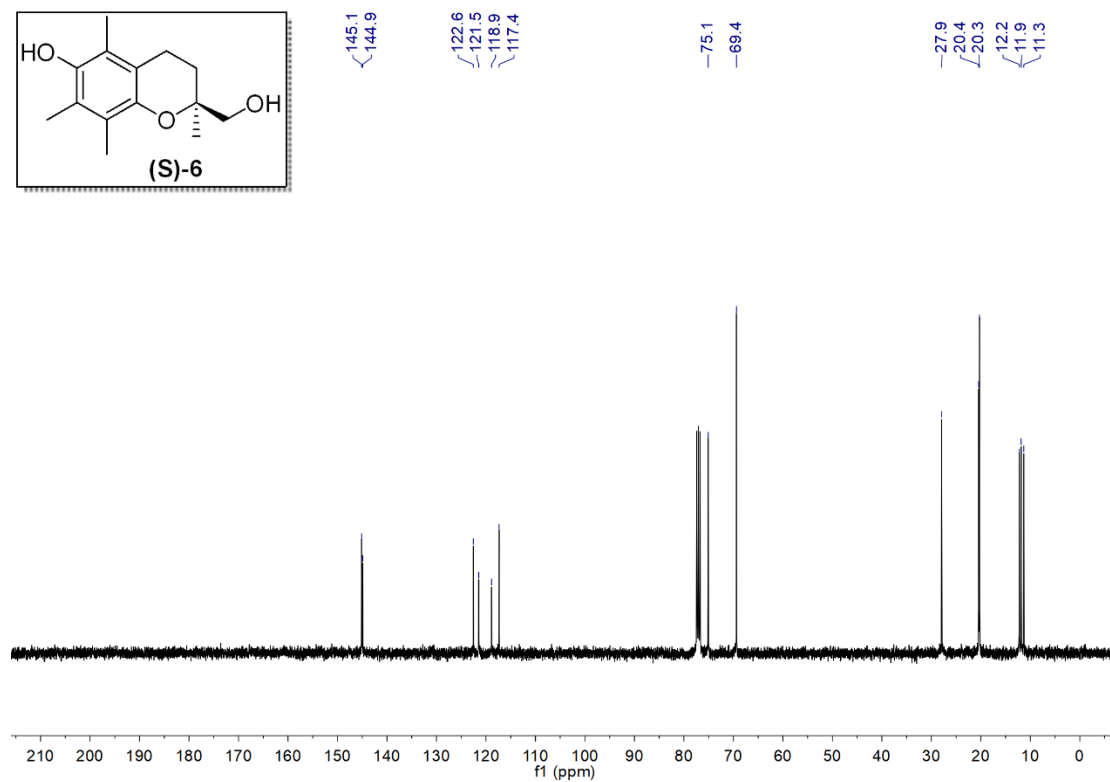

The  $^1\text{H}$  NMR (400 MHz,  $\text{CDCl}_3$ ) Spectrum of (S)-51

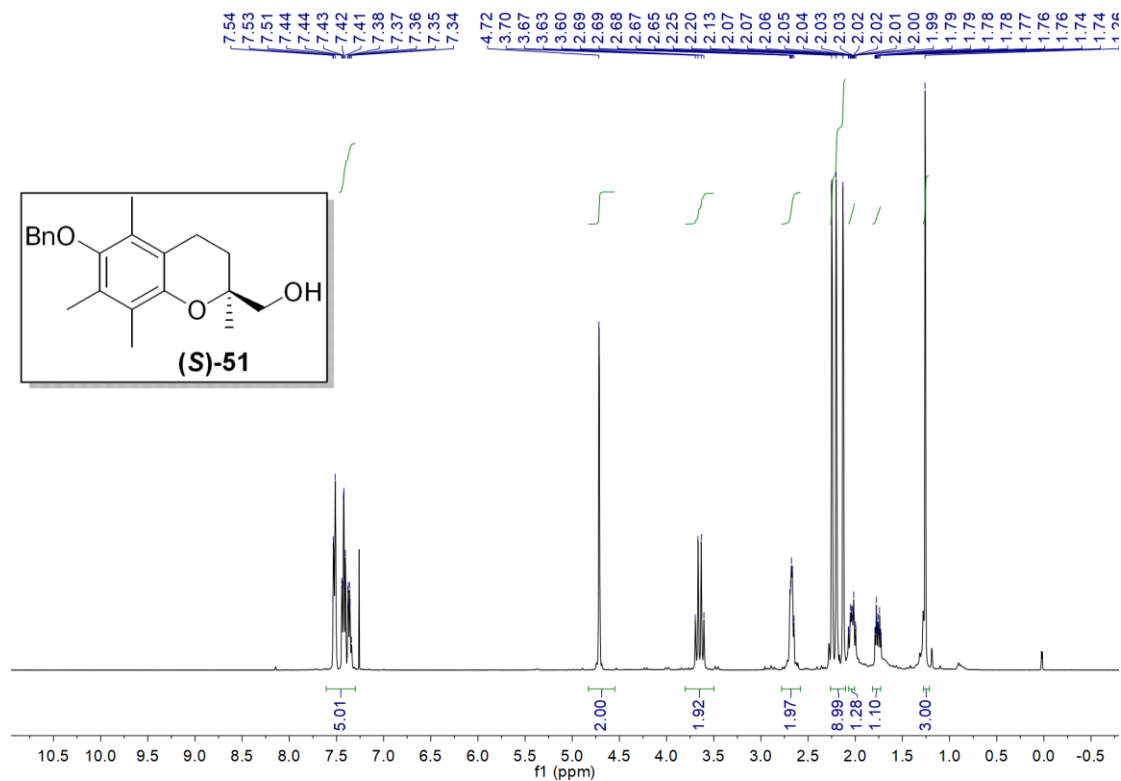

The  $^{13}\text{C}\{^1\text{H}\}$  NMR (100 MHz,  $\text{CDCl}_3$ ) Spectrum of (S)-51

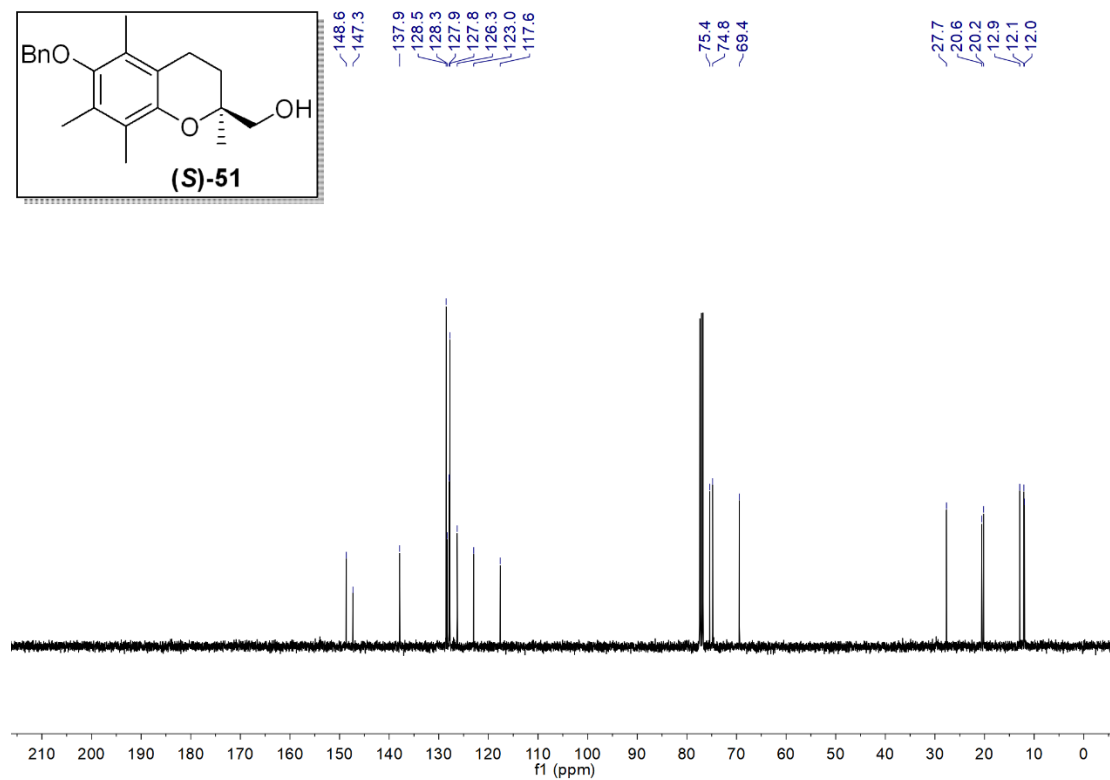

The  $^1\text{H}$  NMR (400 MHz,  $\text{CDCl}_3$ ) Spectrum of (S)-35

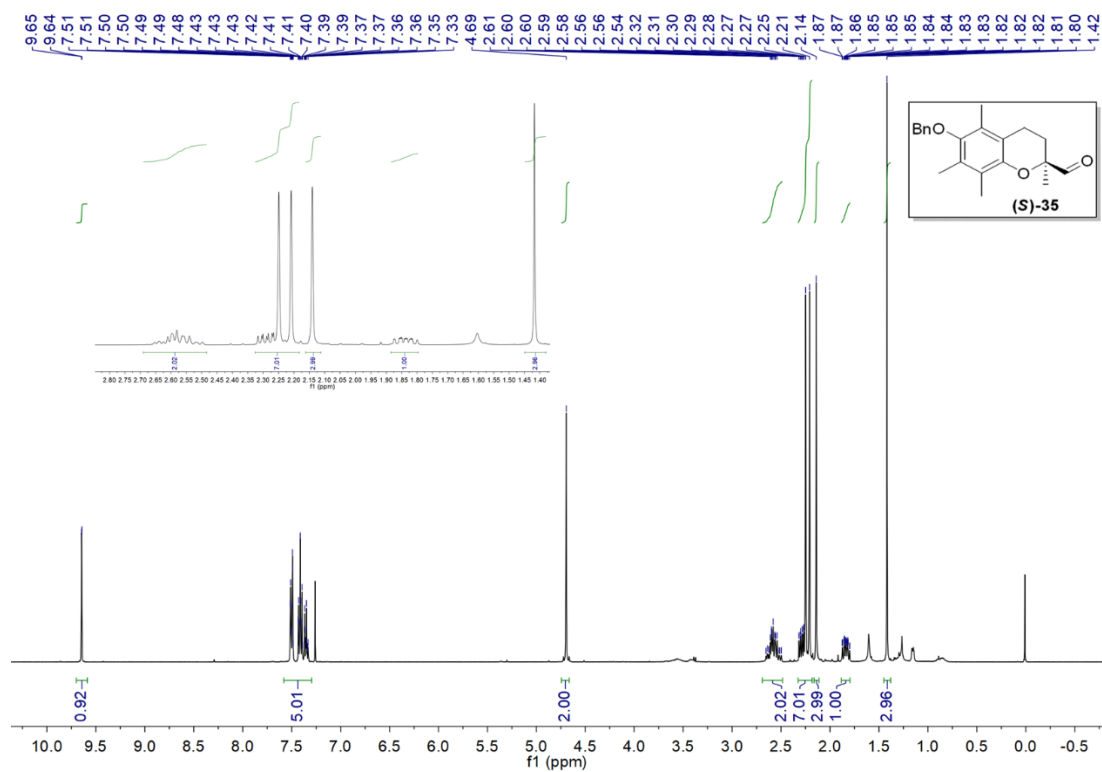

The  $^{13}\text{C}\{^1\text{H}\}$  NMR (100 MHz,  $\text{CDCl}_3$ ) Spectrum of (S)-35

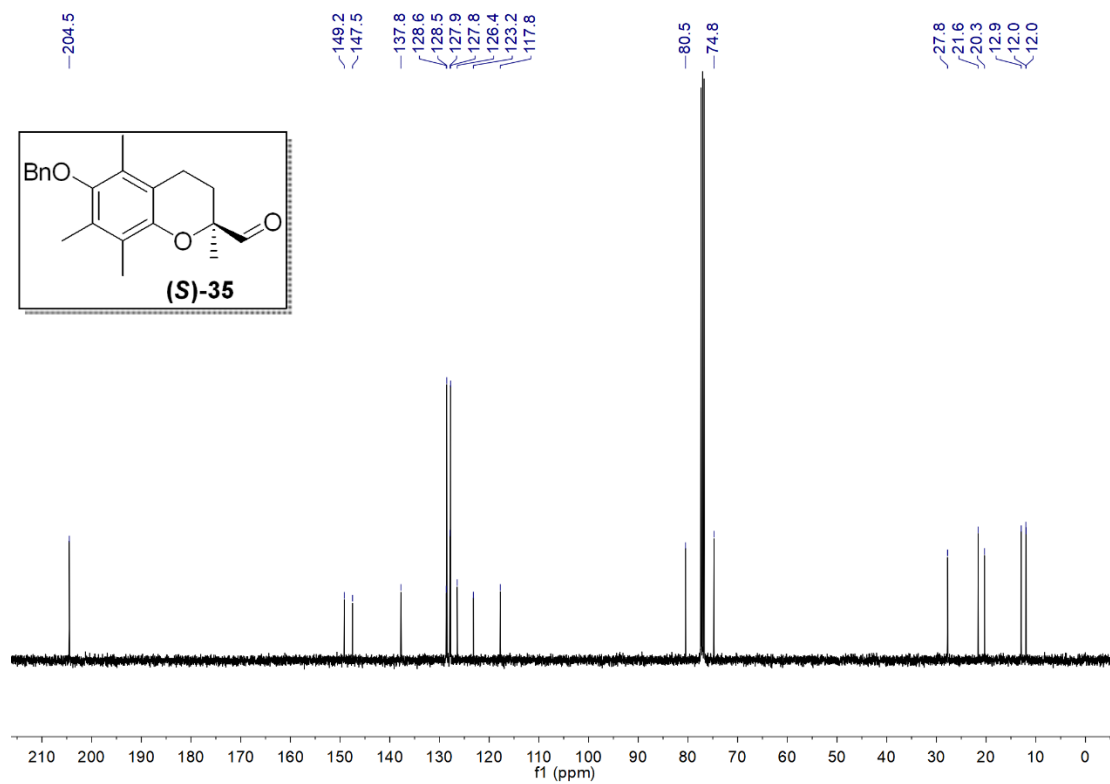

The  $^1\text{H}$  NMR (400 MHz,  $\text{CDCl}_3$ ) Spectrum of 52

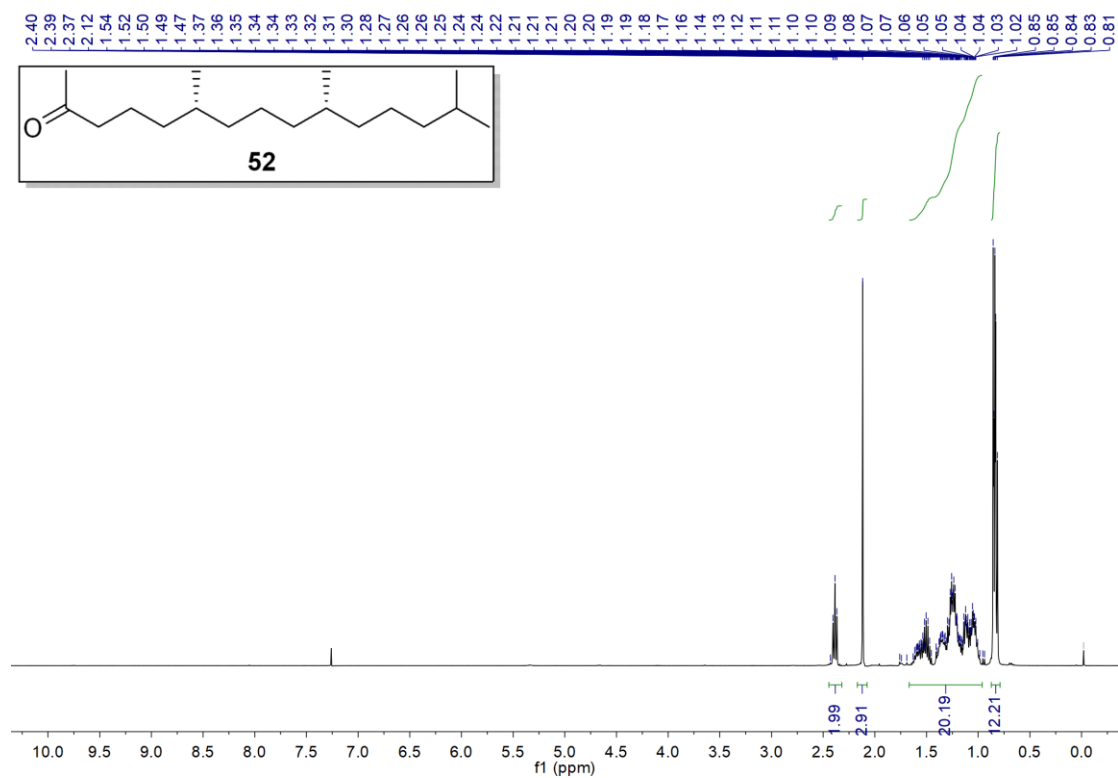

The  $^{13}\text{C}\{^1\text{H}\}$  NMR (100 MHz,  $\text{CDCl}_3$ ) Spectrum of 52

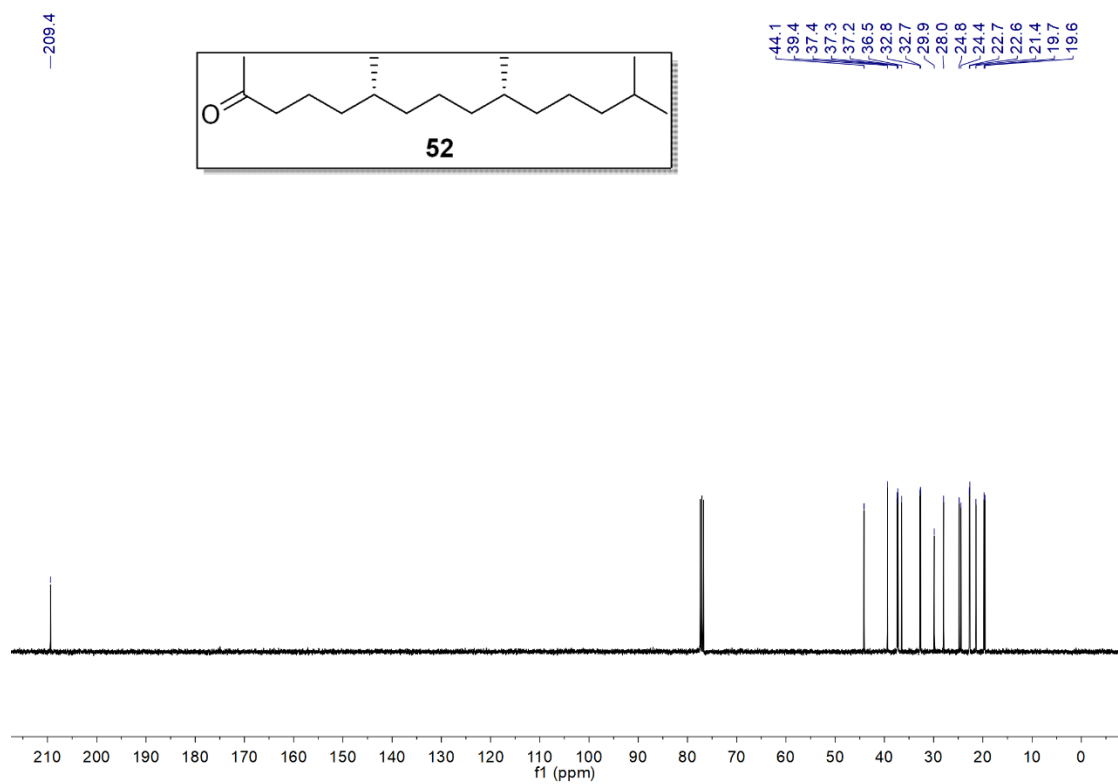

The  $^1\text{H}$  NMR (400 MHz,  $\text{CDCl}_3$ ) Spectrum of 53

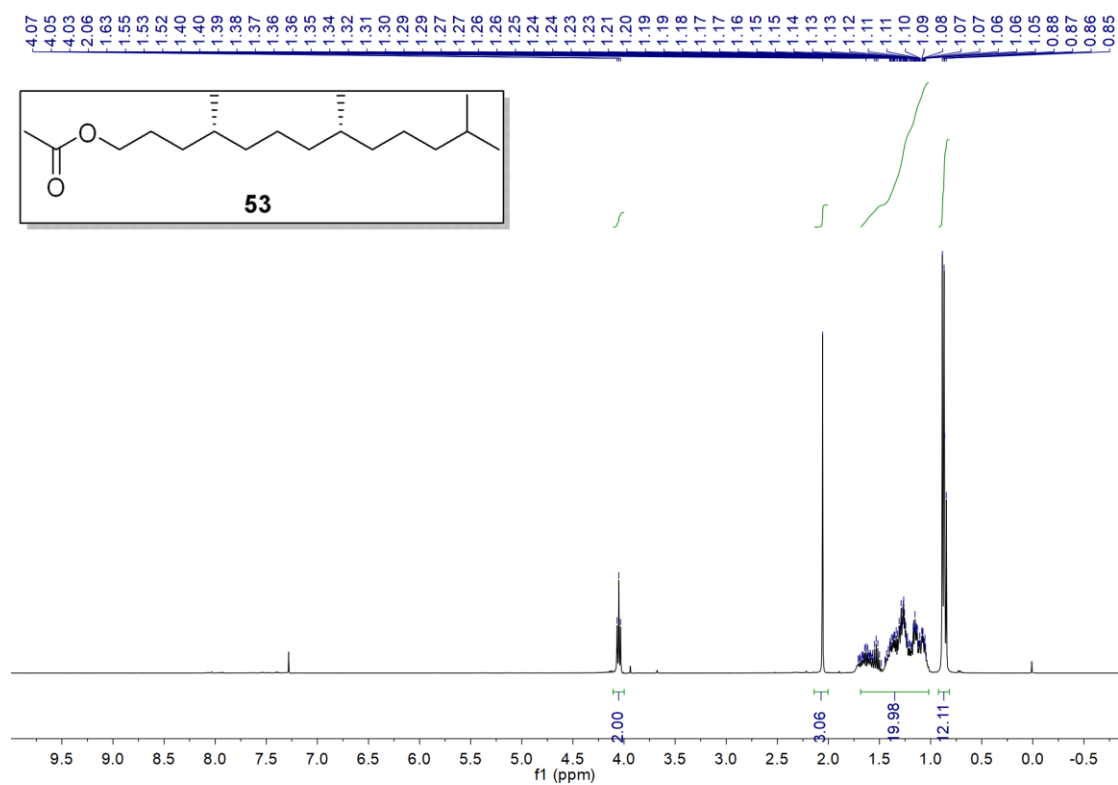

The  $^{13}\text{C}\{^1\text{H}\}$  NMR (100 MHz,  $\text{CDCl}_3$ ) Spectrum of 53

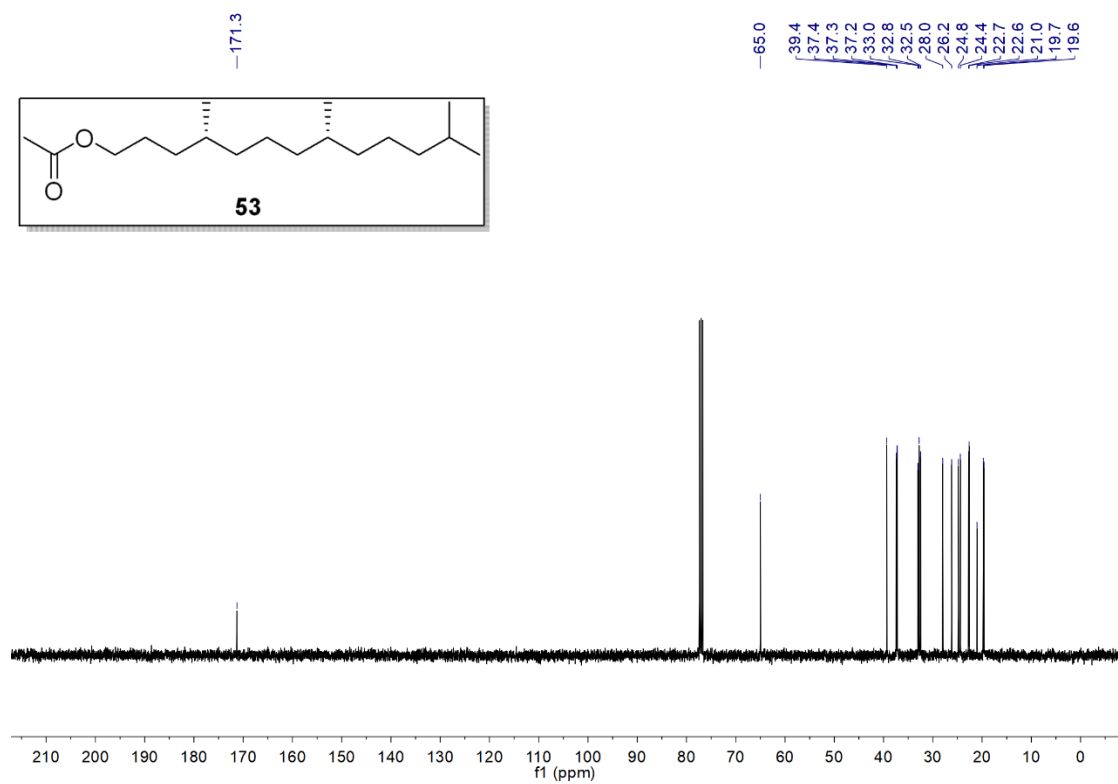

The  $^1\text{H}$  NMR (400 MHz,  $\text{CDCl}_3$ ) Spectrum of 54

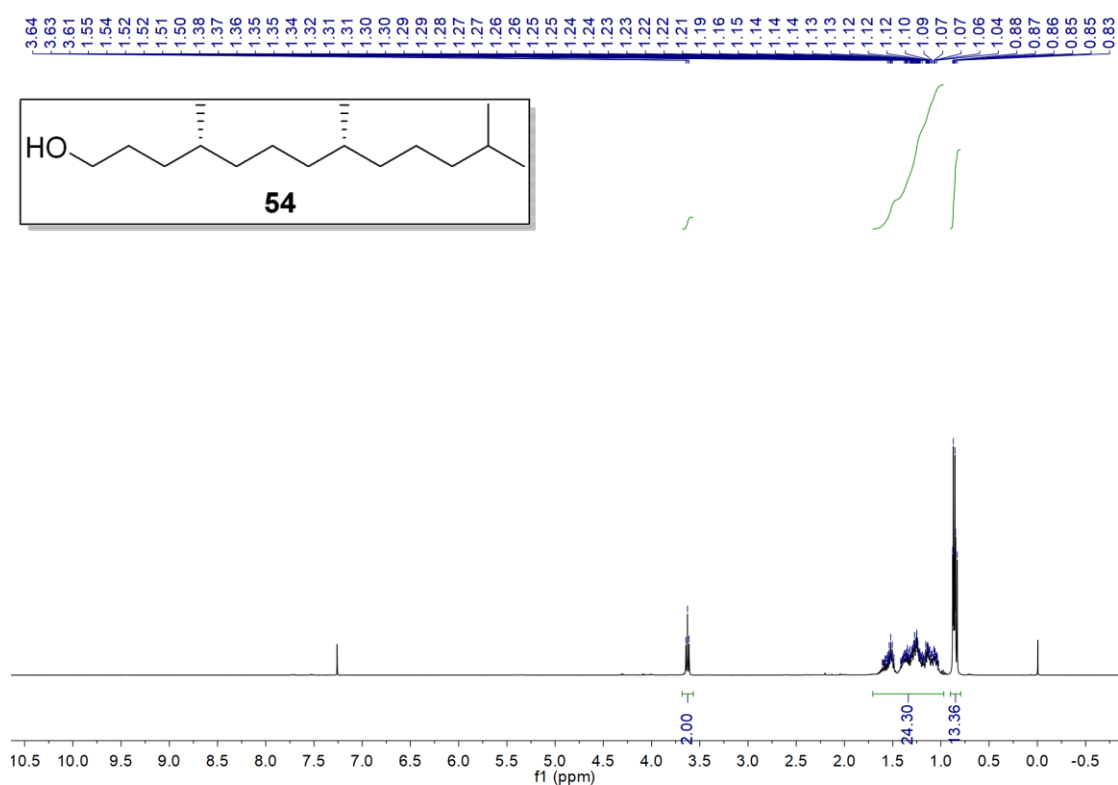

The  $^{13}\text{C}\{^1\text{H}\}$  NMR (100 MHz,  $\text{CDCl}_3$ ) Spectrum of 54

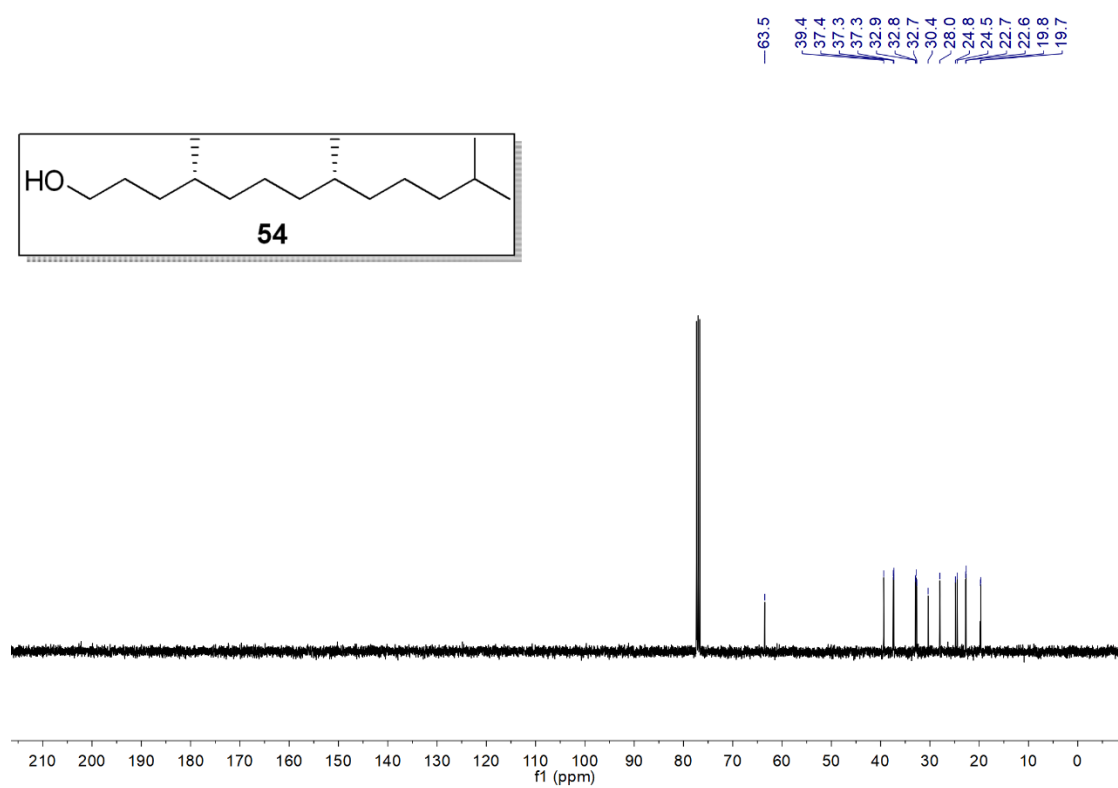

The  $^1\text{H}$  NMR (400 MHz,  $\text{CDCl}_3$ ) Spectrum of 55

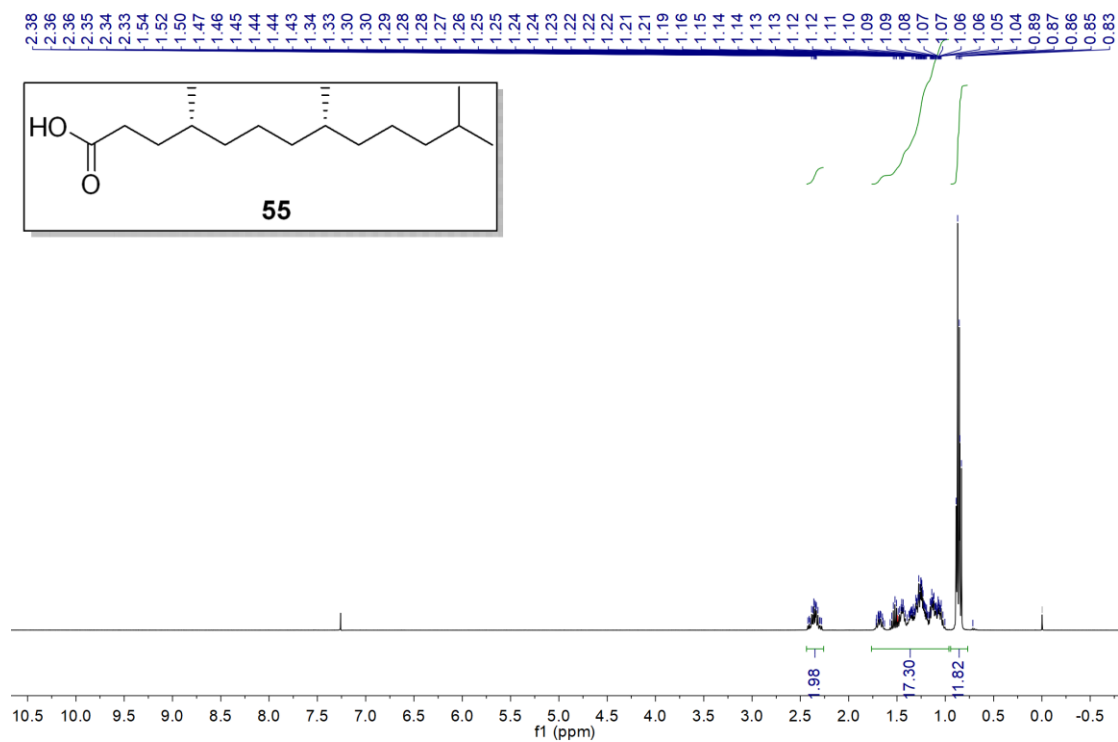

The  $^{13}\text{C}\{^1\text{H}\}$  NMR (100 MHz,  $\text{CDCl}_3$ ) Spectrum of 55

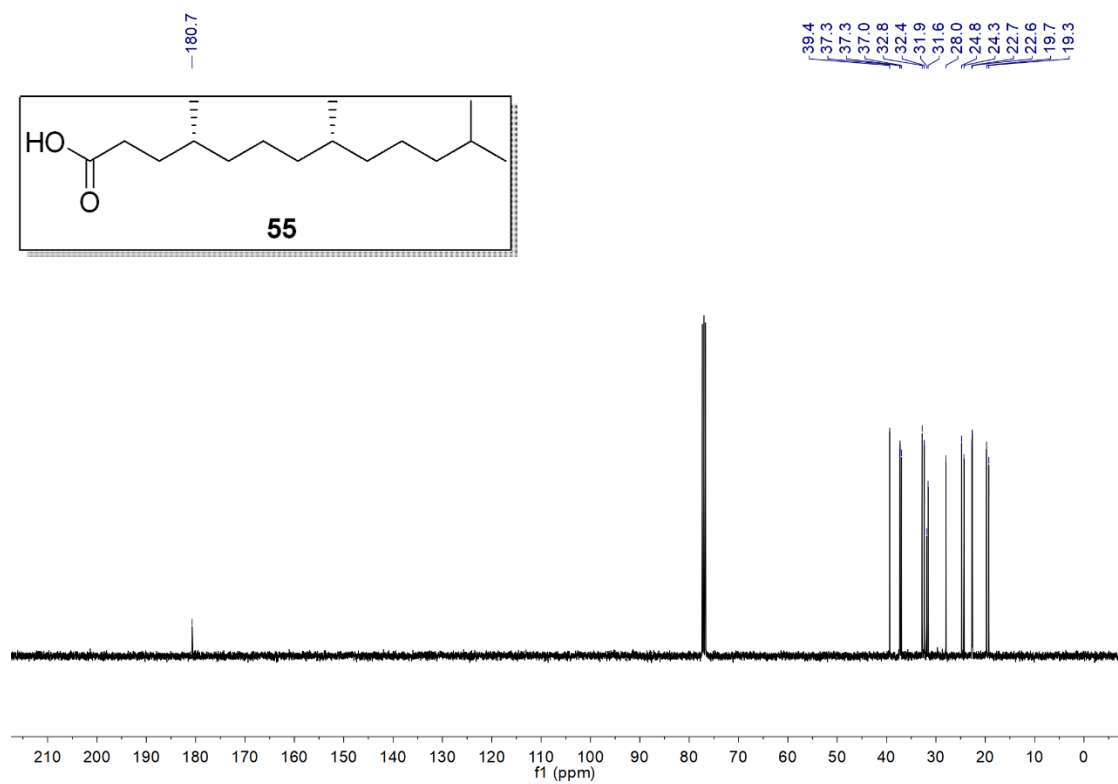



The  $^1\text{H}$  NMR (400 MHz,  $\text{CDCl}_3$ ) Spectrum of 56

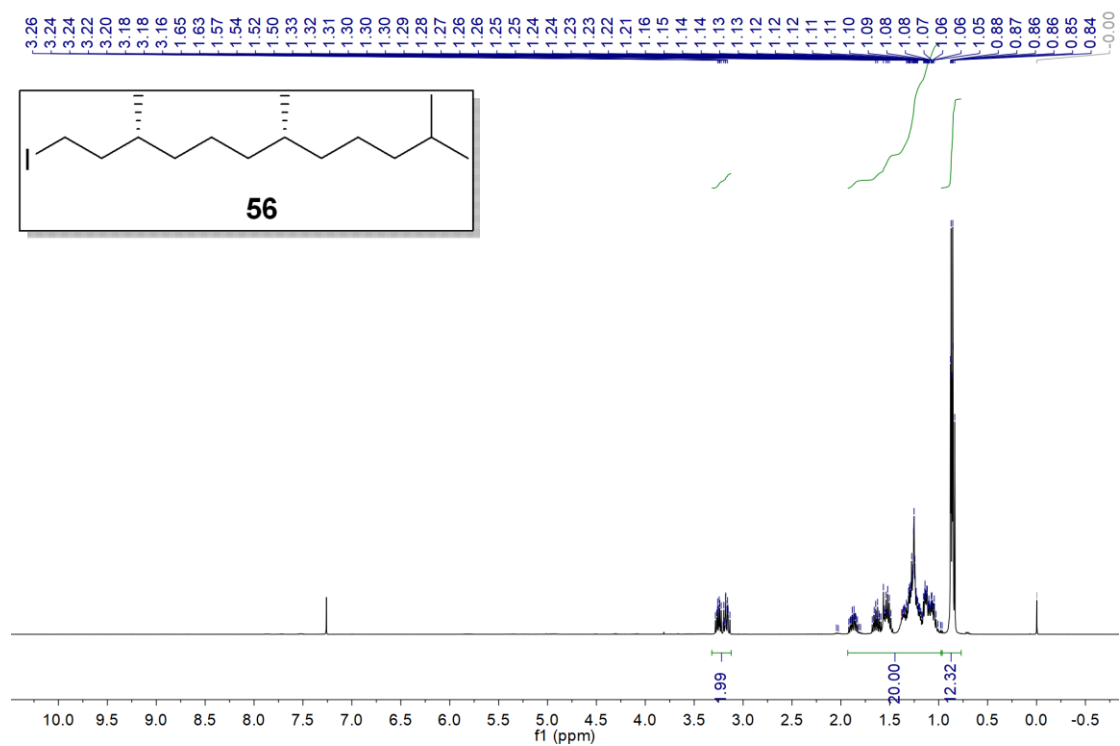

The  $^{13}\text{C}\{^1\text{H}\}$  NMR (100 MHz,  $\text{CDCl}_3$ ) Spectrum of 56

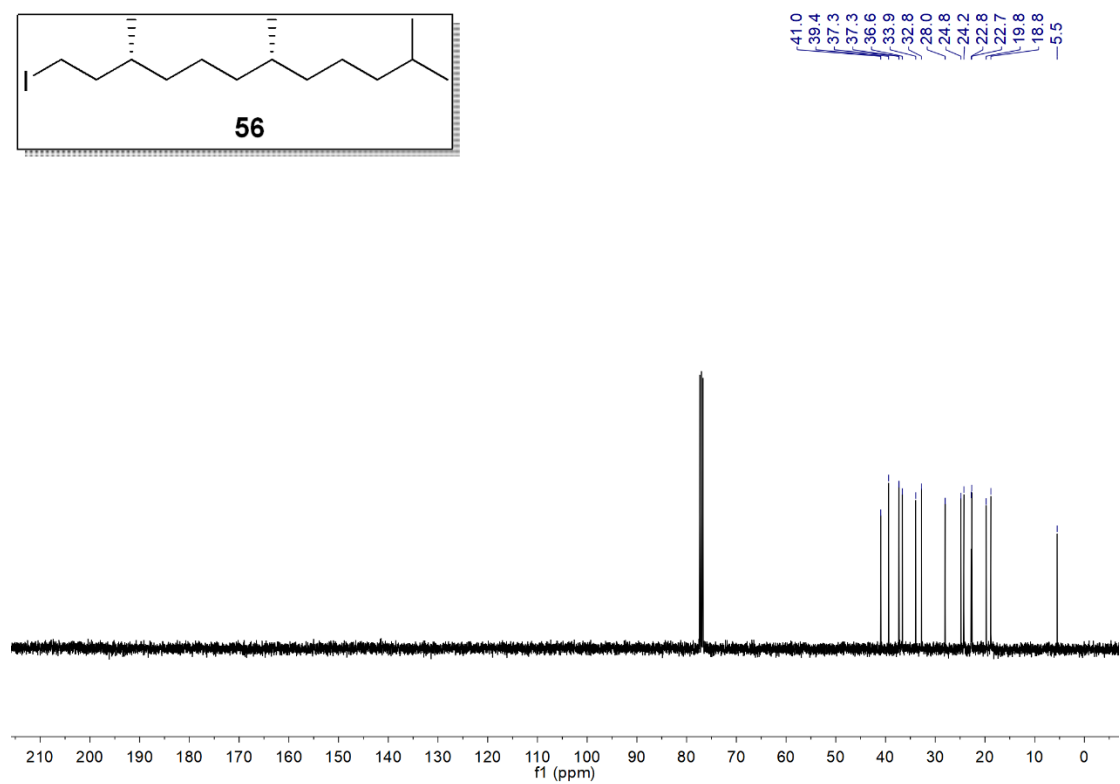

The  $^1\text{H}$  NMR (400 MHz,  $\text{CDCl}_3$ ) Spectrum of 57

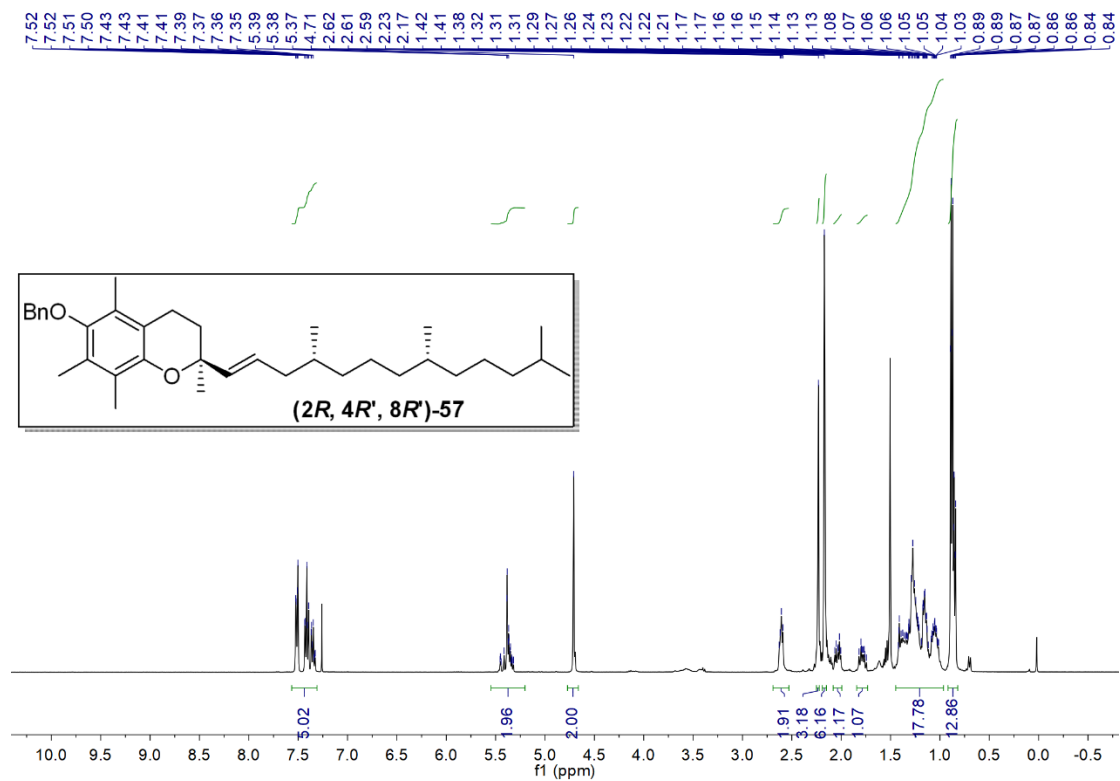

The  $^{13}\text{C}\{^1\text{H}\}$  NMR (100 MHz,  $\text{CDCl}_3$ ) Spectrum of **57**

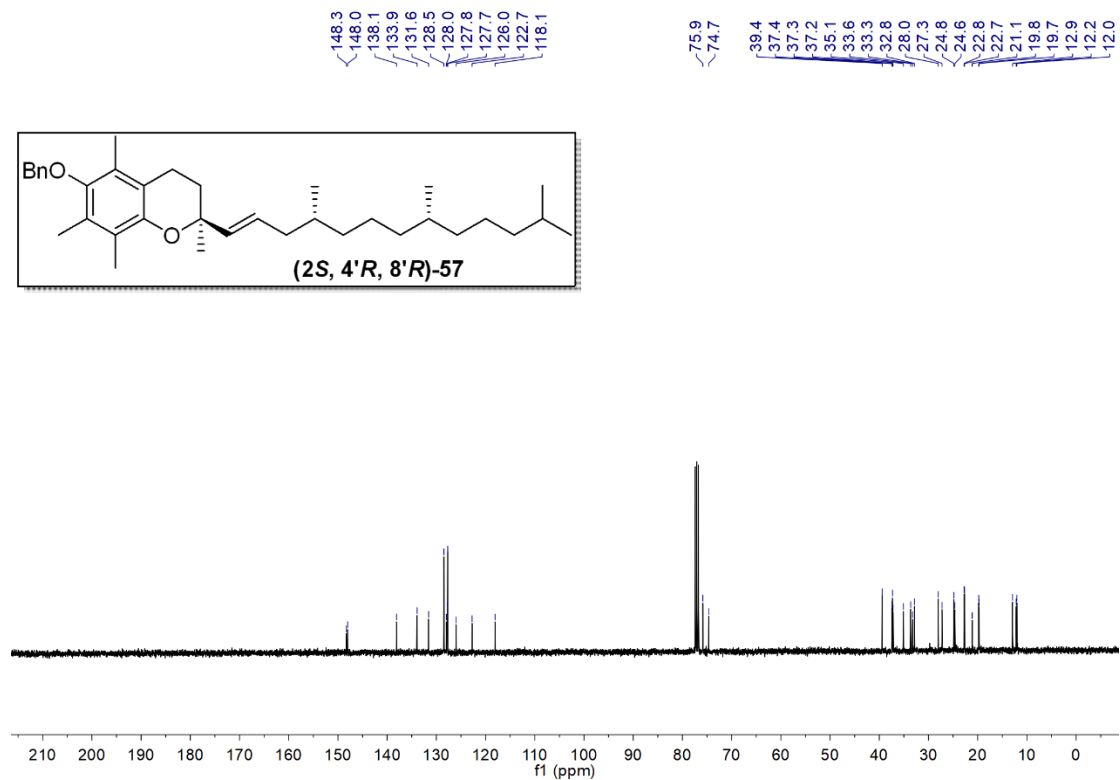

The  $^1\text{H}$  NMR (400 MHz,  $\text{CDCl}_3$ ) Spectrum of **1**

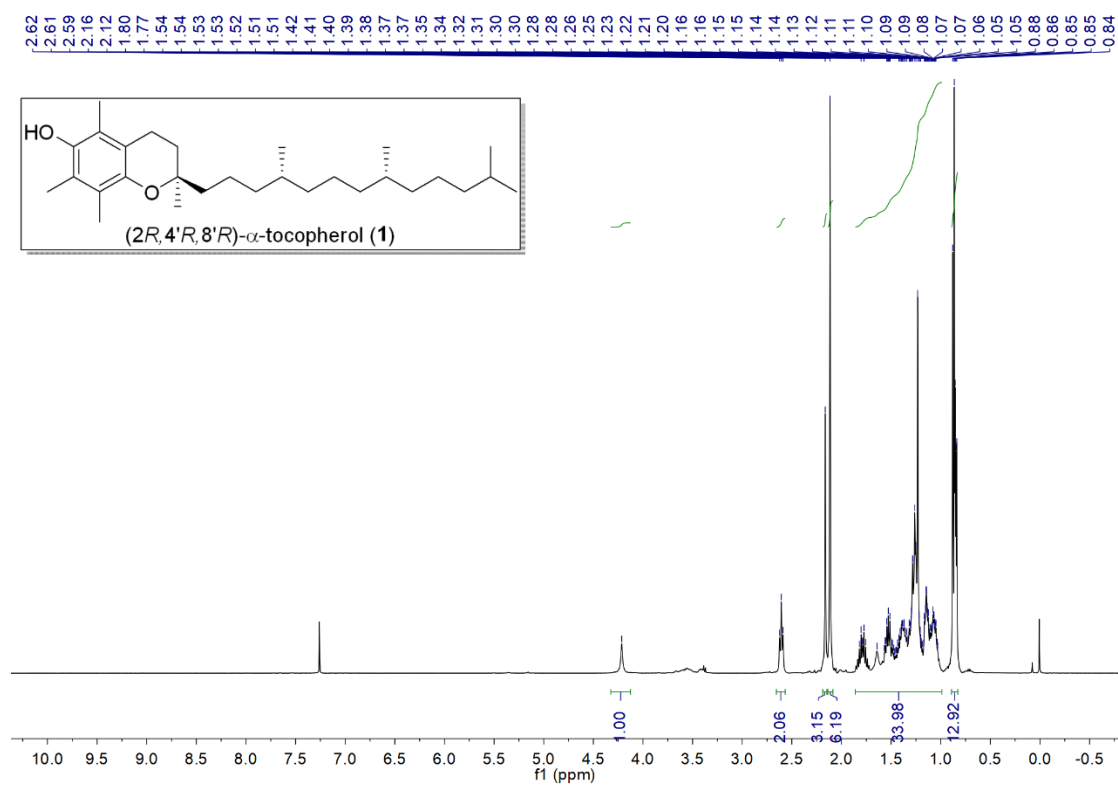

The  $^{13}\text{C}\{^1\text{H}\}$  NMR (100 MHz,  $\text{CDCl}_3$ ) Spectrum of **1**

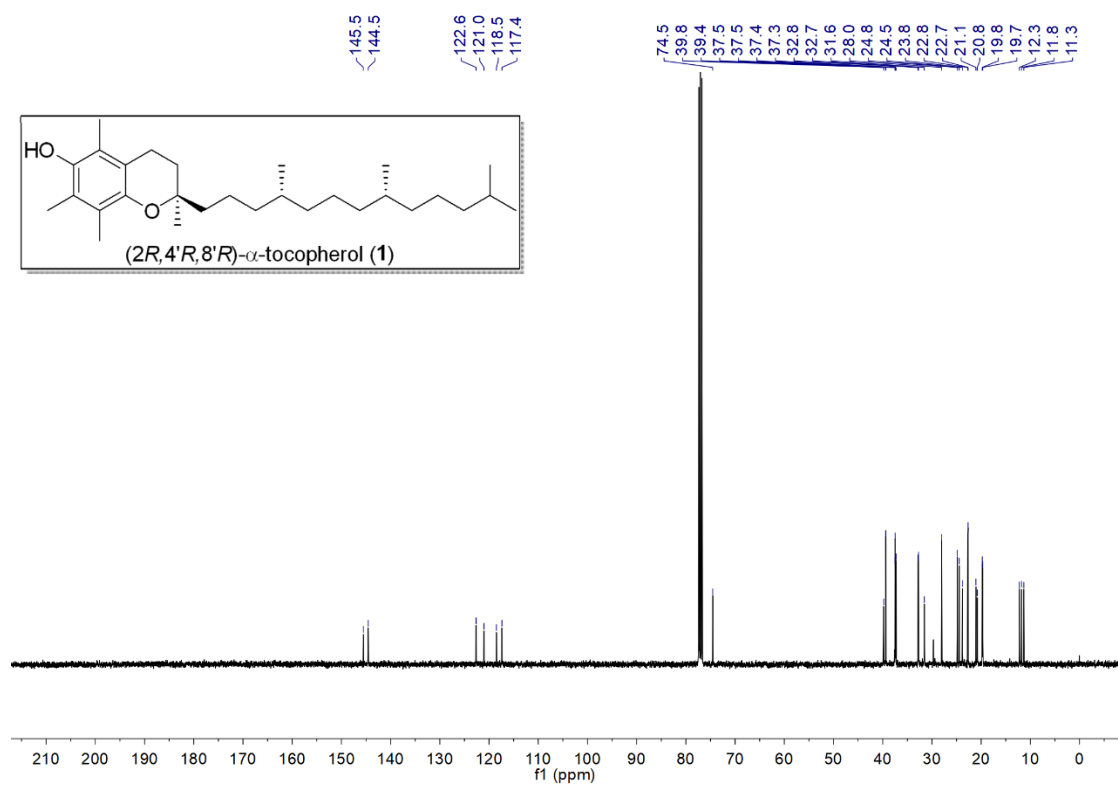

**(S)-37a**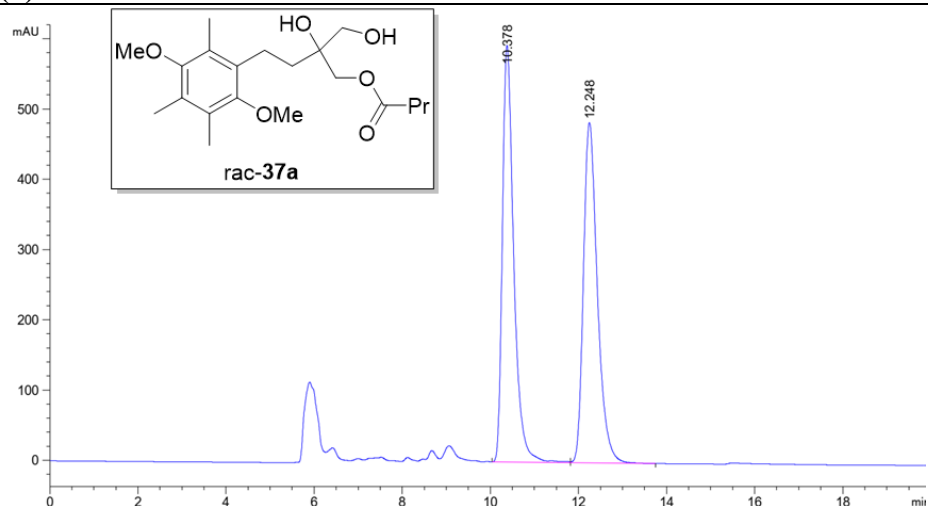

| peak # | retention time [min] | type | peak width [min] | peak area [mAU*s] | peak height [mAU] | peak area % |
|--------|----------------------|------|------------------|-------------------|-------------------|-------------|
| 峰 #    | 保留时间 [min]           | 类型   | 峰宽 [min]         | 峰面积 [mAU*s]       | 峰高 [mAU]          | 峰面积 %       |
| 1      | 10.378               | BV R | 0.2715           | 1.06133e4         | 592.88495         | 49.9097     |
| 2      | 12.248               | VB   | 0.3351           | 1.06517e4         | 484.48669         | 50.0903     |

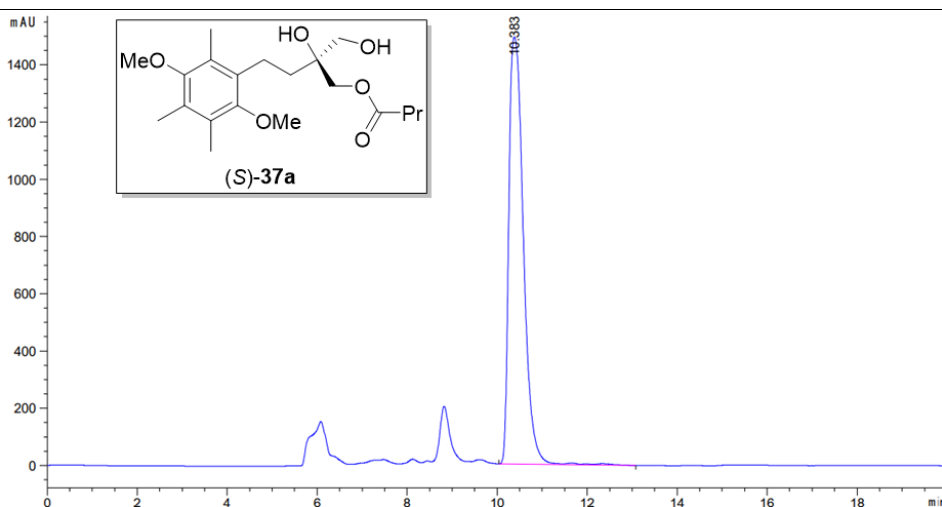

| peak # | retention time [min] | type | peak width [min] | peak area [mAU*s] | peak height [mAU] | peak area % |
|--------|----------------------|------|------------------|-------------------|-------------------|-------------|
| 峰 #    | 保留时间 [min]           | 类型   | 峰宽 [min]         | 峰面积 [mAU*s]       | 峰高 [mAU]          | 峰面积 %       |
| 1      | 10.383               | BV R | 0.3496           | 3.34642e4         | 1492.62866        | 100.0000    |

The top spectrum is the chiral HPLC analysis of the racemic synthetic standard. The bottom spectrum is the chiral HPLC analysis of PPL-catalyzed transesterification of triol **38** in analytical scale.

**(S)-37a**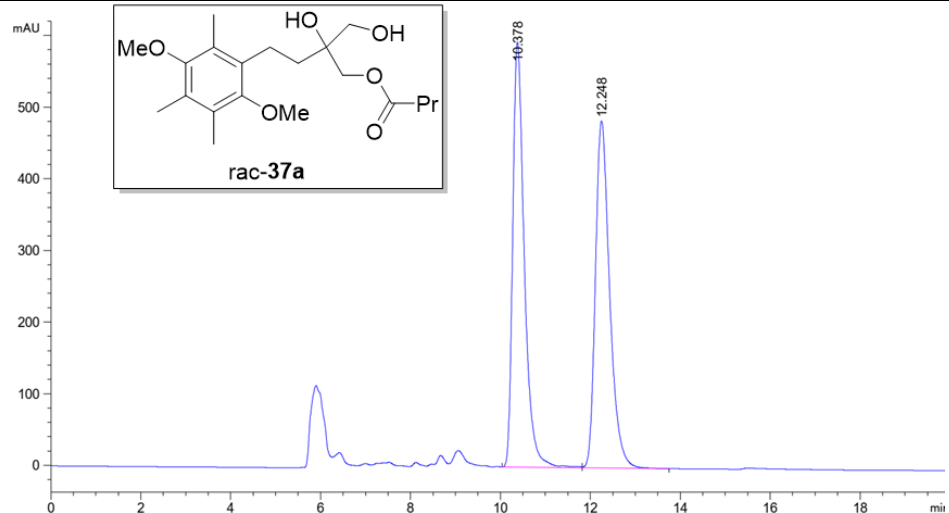

| peak # | retention time [min] | type | peak width [min] | peak area [mAU*s] | peak height [mAU] | peak area % |
|--------|----------------------|------|------------------|-------------------|-------------------|-------------|
| 1      | 10.378               | BV R | 0.2715           | 1.06133e4         | 592.88495         | 49.9097     |
| 2      | 12.248               | VB   | 0.3351           | 1.06517e4         | 484.48669         | 50.0903     |

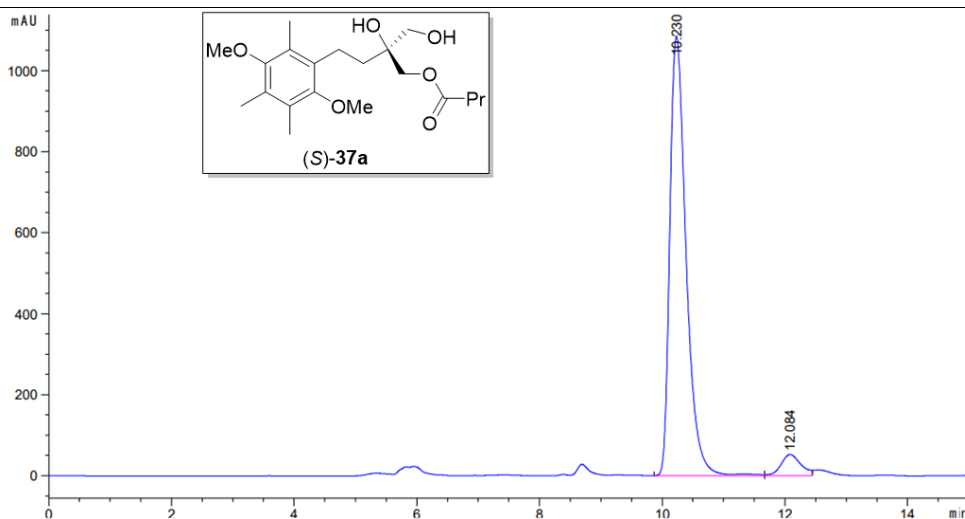

| peak # | retention time [min] | type | peak width [min] | peak area [mAU*s] | peak height [mAU] | peak area % |
|--------|----------------------|------|------------------|-------------------|-------------------|-------------|
| 1      | 10.230               | BV R | 0.2802           | 1.99375e4         | 1084.92773        | 94.4085     |
| 2      | 12.084               | VV   | 0.3424           | 1180.82068        | 52.23682          | 5.5915      |

The top spectrum is the chiral HPLC analysis of the racemic synthetic standard. The bottom spectrum is the chiral HPLC analysis of PPL-catalyzed transesterification of triol **38** in 200 mg scale.

**(R)-37a**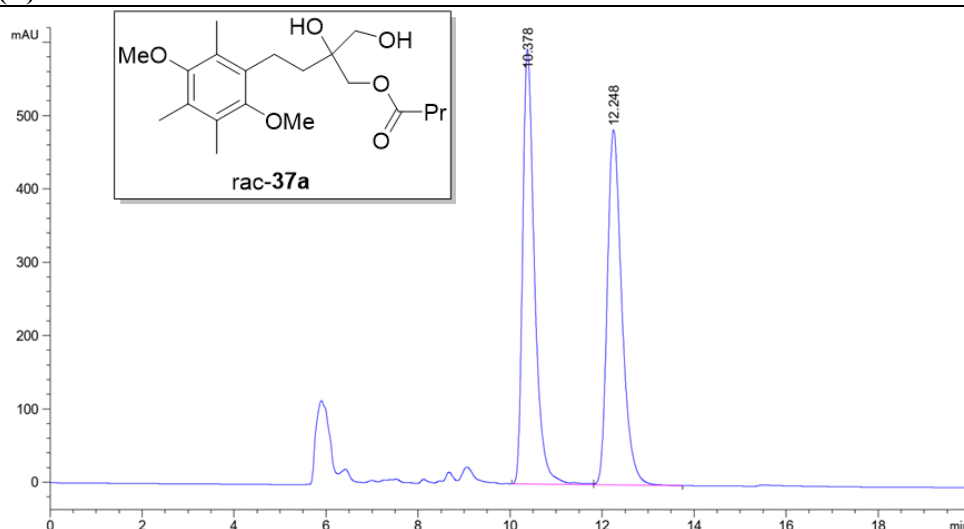

| peak # | retention time [min] | type | peak width [min] | peak area [mAU*s] | peak height [mAU] | peak area % |
|--------|----------------------|------|------------------|-------------------|-------------------|-------------|
| 1      | 10.378               | BV R | 0.2715           | 1.06133e4         | 592.88495         | 49.9097     |
| 2      | 12.248               | VB   | 0.3351           | 1.06517e4         | 484.48669         | 50.0903     |

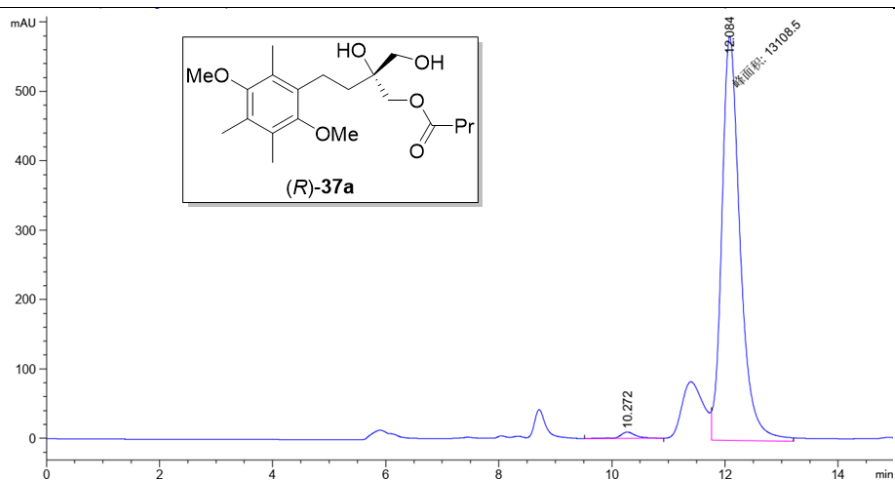

| peak # | retention time [min] | type | peak width [min] | peak area [mAU*s] | peak height [mAU] | peak area % |
|--------|----------------------|------|------------------|-------------------|-------------------|-------------|
| 1      | 10.272               | VB R | 0.2789           | 173.52596         | 9.11401           | 1.3065      |
| 2      | 12.084               | FM   | 0.3754           | 1.31085e4         | 582.03961         | 98.6935     |

The top spectrum is the chiral HPLC analysis of the racemic synthetic standard. The bottom spectrum is the chiral HPLC analysis of lipase-M-catalyzed hydrolysis of **39a** in analytical scale.

**(R)-37a**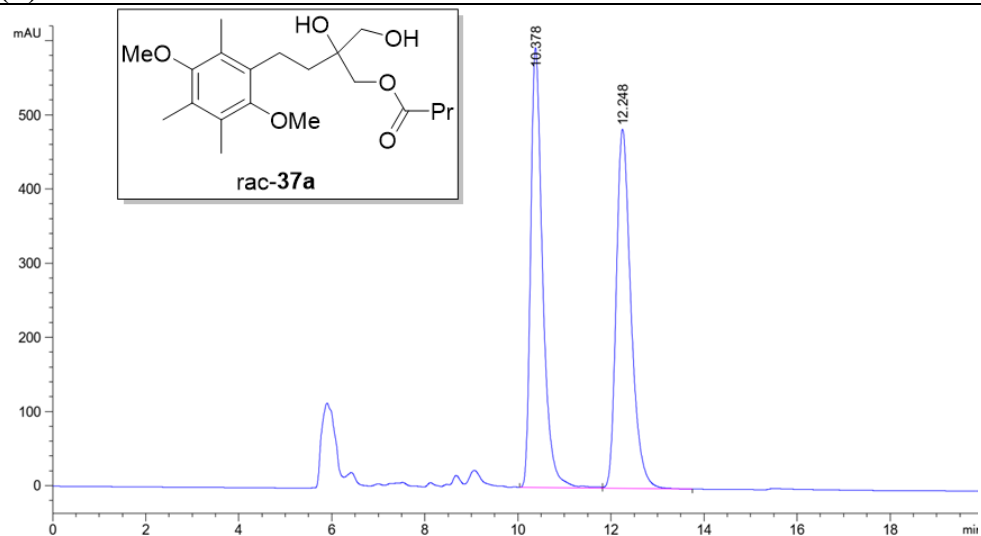

| peak # | retention time [min] | type | peak width [min] | peak area [mAU*s] | peak height [mAU] | peak area % |
|--------|----------------------|------|------------------|-------------------|-------------------|-------------|
| 1      | 10.378               | BV R | 0.2715           | 1.06133e4         | 592.88495         | 49.9097     |
| 2      | 12.248               | VB   | 0.3351           | 1.06517e4         | 484.48669         | 50.0903     |

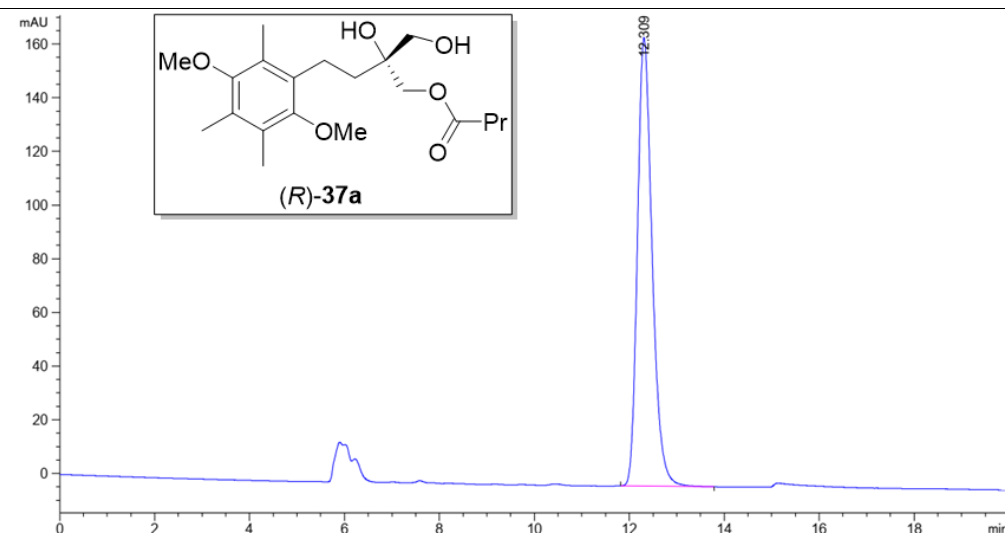

| peak # | retention time [min] | type | peak width [min] | peak area [mAU*s] | peak height [mAU] | peak area % |
|--------|----------------------|------|------------------|-------------------|-------------------|-------------|
| 1      | 12.309               | BB   | 0.3313           | 3598.36743        | 167.11610         | 100.0000    |

The top spectrum is the chiral HPLC analysis of the racemic synthetic standard. The bottom spectrum is the chiral HPLC analysis of lipase-M-catalyzed hydrolysis of **39a** in gram scale, product after recrystallization.

**(S)-6**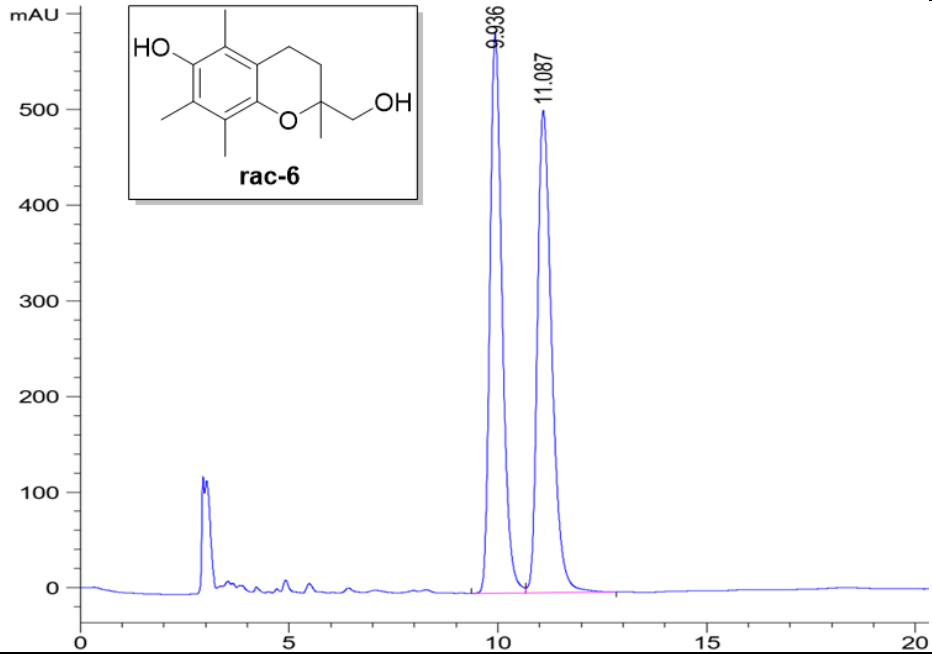

| peak # | retention time [min] | type | peak width [min] | peak area [mAU*s] | peak height [mAU] | peak area % |
|--------|----------------------|------|------------------|-------------------|-------------------|-------------|
| 1      | 9.936                | BV   | 0.3123           | 1.18639e4         | 585.00037         | 49.6303     |
| 2      | 11.087               | VB   | 0.3659           | 1.20407e4         | 504.37009         | 50.3697     |

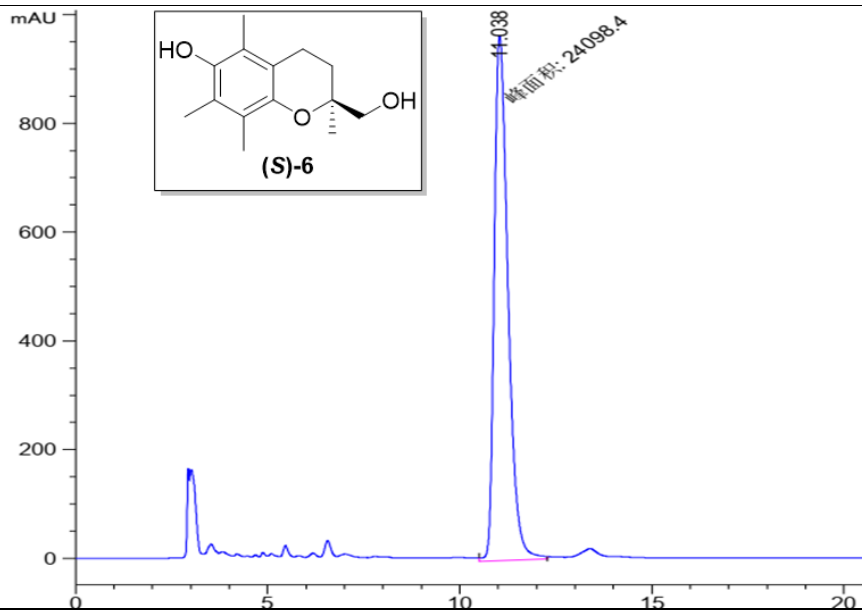

| peak # | retention time [min] | type | peak width [min] | peak area [mAU*s] | peak height [mAU] | peak area % |
|--------|----------------------|------|------------------|-------------------|-------------------|-------------|
| 1      | 11.038               | MM   | 0.4161           | 2.40984e4         | 965.28284         | 100.0000    |

The top spectrum is the chiral HPLC analysis of the racemic synthetic standard. The bottom spectrum is the chiral HPLC analysis of (S)-6.



## Crystallographic information

The crystal data of compound (*S*)-**6** has been deposited in CCDC with number 2115175.

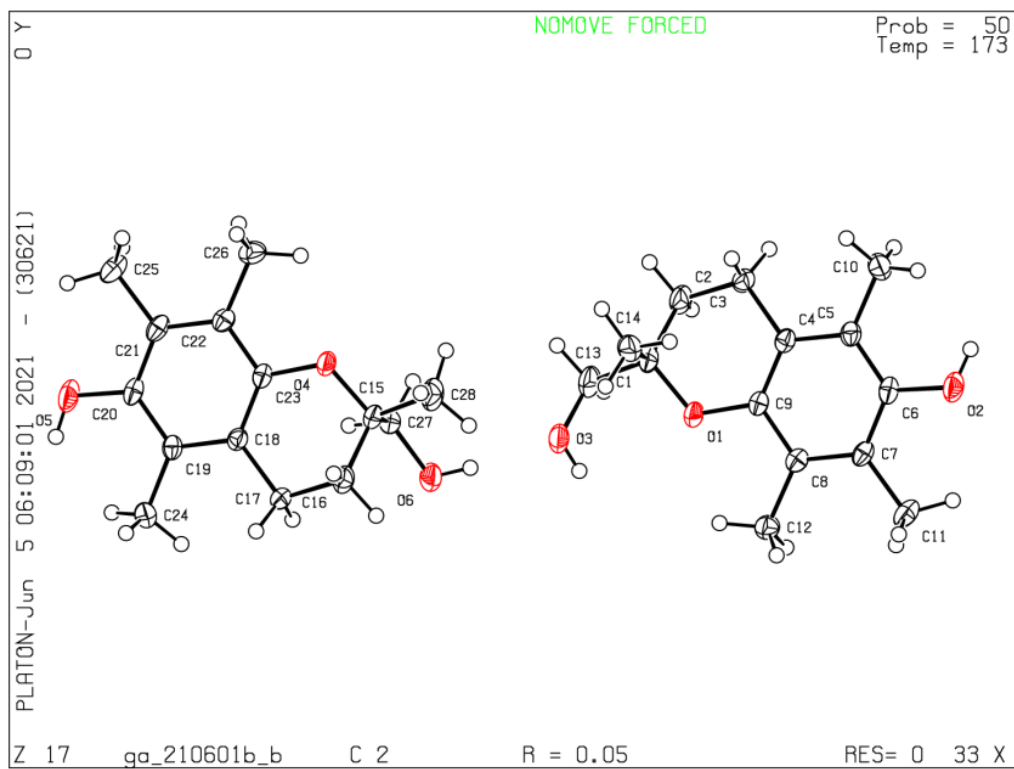

**Table 1. Crystal data and structure refinement for CCDC 2115175.**

|                                   |                                                |                    |
|-----------------------------------|------------------------------------------------|--------------------|
| Identification code               | ga_210601b_b                                   |                    |
| Empirical formula                 | C <sub>14</sub> H <sub>20</sub> O <sub>3</sub> |                    |
| Formula weight                    | 236.30                                         |                    |
| Temperature                       | 173(2) K                                       |                    |
| Wavelength                        | 1.34138 Å                                      |                    |
| Crystal system                    | Monoclinic                                     |                    |
| Space group                       | C2                                             |                    |
| Unit cell dimensions              | a = 38.9060(12) Å                              | α = 90 °           |
|                                   | b = 5.7838(2) Å                                | β = 102.5260(10) ° |
|                                   | c = 11.1782(3) Å                               | γ = 90 °           |
| Volume                            | 2455.50(13) Å <sup>3</sup>                     |                    |
| Z                                 | 8                                              |                    |
| Density (calculated)              | 1.278 Mg/m <sup>3</sup>                        |                    |
| Absorption coefficient            | 0.453 mm <sup>-1</sup>                         |                    |
| F(000)                            | 1024                                           |                    |
| Crystal size                      | 0.430 x 0.290 x 0.010 mm <sup>3</sup>          |                    |
| Theta range for data collection   | 3.664 to 58.993 °                              |                    |
| Index ranges                      | -49 ≤ h ≤ 49, -7 ≤ k ≤ 7, -13 ≤ l ≤ 14         |                    |
| Reflections collected             | 16142                                          |                    |
| Independent reflections           | 5341 [R(int) = 0.0546]                         |                    |
| Completeness to theta = 53.594 °  | 99.8 %                                         |                    |
| Absorption correction             | Semi-empirical from equivalents                |                    |
| Max. and min. transmission        | 0.752 and 0.579                                |                    |
| Refinement method                 | Full-matrix least-squares on F <sup>2</sup>    |                    |
| Data / restraints / parameters    | 5341 / 5 / 331                                 |                    |
| Goodness-of-fit on F <sup>2</sup> | 1.056                                          |                    |
| Final R indices [I > 2σ(I)]       | R1 = 0.0454, wR2 = 0.1234                      |                    |
| R indices (all data)              | R1 = 0.0483, wR2 = 0.1270                      |                    |
| Absolute structure parameter      | 0.14(12)                                       |                    |
| Extinction coefficient            | n/a                                            |                    |
| Largest diff. peak and hole       | 0.570 and -0.240 e.Å <sup>-3</sup>             |                    |

**Table 2. Atomic coordinates ( $\times 10^4$ ) and equivalent isotropic displacement parameters ( $\text{\AA}^2 \times 10^3$ ) for CCDC 2115175.  $U(\text{eq})$  is defined as one third of the trace of the orthogonalized  $U^{ij}$  tensor.**

|       | x       | y        | z        | $U(\text{eq})$ |
|-------|---------|----------|----------|----------------|
| O(1)  | 5926(1) | 6543(3)  | 7241(1)  | 26(1)          |
| O(2)  | 7322(1) | 8027(4)  | 9435(2)  | 32(1)          |
| O(3)  | 5238(1) | 4918(4)  | 6471(2)  | 35(1)          |
| C(1)  | 5648(1) | 7623(4)  | 7716(2)  | 26(1)          |
| C(2)  | 5732(1) | 10183(5) | 7915(2)  | 33(1)          |
| C(3)  | 6076(1) | 10529(4) | 8857(2)  | 28(1)          |
| C(4)  | 6359(1) | 8912(4)  | 8611(2)  | 21(1)          |
| C(5)  | 6713(1) | 9251(4)  | 9183(2)  | 22(1)          |
| C(6)  | 6968(1) | 7804(5)  | 8881(2)  | 23(1)          |
| C(7)  | 6880(1) | 6019(4)  | 8022(2)  | 22(1)          |
| C(8)  | 6527(1) | 5608(4)  | 7501(2)  | 21(1)          |
| C(9)  | 6269(1) | 7062(4)  | 7806(2)  | 20(1)          |
| C(10) | 6816(1) | 11145(5) | 10122(2) | 30(1)          |
| C(11) | 7164(1) | 4566(5)  | 7665(2)  | 30(1)          |
| C(12) | 6421(1) | 3682(5)  | 6592(2)  | 27(1)          |
| C(13) | 5322(1) | 7287(5)  | 6703(2)  | 35(1)          |
| C(14) | 5608(1) | 6403(5)  | 8885(2)  | 31(1)          |
| O(4)  | 4049(1) | 3411(3)  | 7868(1)  | 26(1)          |
| O(5)  | 2664(1) | 1911(4)  | 5549(2)  | 35(1)          |
| O(6)  | 4600(1) | 2907(3)  | 5600(1)  | 32(1)          |
| C(15) | 4332(1) | 2418(4)  | 7390(2)  | 23(1)          |
| C(16) | 4260(1) | -106(5)  | 7102(2)  | 29(1)          |
| C(17) | 3916(1) | -456(4)  | 6163(2)  | 26(1)          |
| C(18) | 3627(1) | 1096(4)  | 6419(2)  | 20(1)          |
| C(19) | 3275(1) | 733(4)   | 5818(2)  | 21(1)          |
| C(20) | 3017(1) | 2156(4)  | 6117(2)  | 22(1)          |
| C(21) | 3097(1) | 3922(4)  | 6979(2)  | 23(1)          |
| C(22) | 3449(1) | 4351(4)  | 7528(2)  | 21(1)          |
| C(23) | 3708(1) | 2918(4)  | 7245(2)  | 20(1)          |
| C(24) | 3182(1) | -1128(5) | 4866(2)  | 29(1)          |
| C(25) | 2809(1) | 5355(5)  | 7320(2)  | 32(1)          |
| C(26) | 3549(1) | 6301(5)  | 8431(2)  | 29(1)          |

|       |         |         |         |       |
|-------|---------|---------|---------|-------|
| C(27) | 4355(1) | 3830(4) | 6251(2) | 25(1) |
| C(28) | 4659(1) | 2767(6) | 8403(2) | 37(1) |

---

**Table 3. Bond lengths [Å] and angles [°] for CCDC 2115175.**

---

|              |          |
|--------------|----------|
| O(1)-C(9)    | 1.381(2) |
| O(1)-C(1)    | 1.444(3) |
| O(2)-C(6)    | 1.387(2) |
| O(2)-H(2)    | 0.87(3)  |
| O(3)-C(13)   | 1.419(4) |
| O(3)-H(3)    | 0.82(3)  |
| C(1)-C(13)   | 1.520(3) |
| C(1)-C(14)   | 1.522(3) |
| C(1)-C(2)    | 1.522(4) |
| C(2)-C(3)    | 1.526(3) |
| C(2)-H(2A)   | 0.9900   |
| C(2)-H(2B)   | 0.9900   |
| C(3)-C(4)    | 1.513(3) |
| C(3)-H(3A)   | 0.9900   |
| C(3)-H(3B)   | 0.9900   |
| C(4)-C(9)    | 1.393(3) |
| C(4)-C(5)    | 1.401(3) |
| C(5)-C(6)    | 1.395(3) |
| C(5)-C(10)   | 1.510(3) |
| C(6)-C(7)    | 1.401(3) |
| C(7)-C(8)    | 1.391(3) |
| C(7)-C(11)   | 1.510(3) |
| C(8)-C(9)    | 1.406(3) |
| C(8)-C(12)   | 1.504(3) |
| C(10)-H(10A) | 0.9800   |
| C(10)-H(10B) | 0.9800   |
| C(10)-H(10C) | 0.9800   |
| C(11)-H(11A) | 0.9800   |
| C(11)-H(11B) | 0.9800   |
| C(11)-H(11C) | 0.9800   |
| C(12)-H(12A) | 0.9800   |
| C(12)-H(12B) | 0.9800   |
| C(12)-H(12C) | 0.9800   |
| C(13)-H(13A) | 0.9900   |
| C(13)-H(13B) | 0.9900   |
| C(14)-H(14A) | 0.9800   |

|              |          |
|--------------|----------|
| C(14)-H(14B) | 0.9800   |
| C(14)-H(14C) | 0.9800   |
| O(4)-C(23)   | 1.386(2) |
| O(4)-C(15)   | 1.444(2) |
| O(5)-C(20)   | 1.387(2) |
| O(5)-H(5)    | 0.88(3)  |
| O(6)-C(27)   | 1.423(3) |
| O(6)-H(6)    | 0.84(3)  |
| C(15)-C(16)  | 1.508(4) |
| C(15)-C(28)  | 1.522(3) |
| C(15)-C(27)  | 1.530(3) |
| C(16)-C(17)  | 1.526(3) |
| C(16)-H(16A) | 0.9900   |
| C(16)-H(16B) | 0.9900   |
| C(17)-C(18)  | 1.513(3) |
| C(17)-H(17A) | 0.9900   |
| C(17)-H(17B) | 0.9900   |
| C(18)-C(23)  | 1.392(3) |
| C(18)-C(19)  | 1.403(3) |
| C(19)-C(20)  | 1.396(3) |
| C(19)-C(24)  | 1.502(3) |
| C(20)-C(21)  | 1.392(3) |
| C(21)-C(22)  | 1.397(3) |
| C(21)-C(25)  | 1.509(3) |
| C(22)-C(23)  | 1.394(3) |
| C(22)-C(26)  | 1.507(3) |
| C(24)-H(24A) | 0.9800   |
| C(24)-H(24B) | 0.9800   |
| C(24)-H(24C) | 0.9800   |
| C(25)-H(25A) | 0.9800   |
| C(25)-H(25B) | 0.9800   |
| C(25)-H(25C) | 0.9800   |
| C(26)-H(26A) | 0.9800   |
| C(26)-H(26B) | 0.9800   |
| C(26)-H(26C) | 0.9800   |
| C(27)-H(27A) | 0.9900   |
| C(27)-H(27B) | 0.9900   |
| C(28)-H(28A) | 0.9800   |

|                  |            |
|------------------|------------|
| C(28)-H(28B)     | 0.9800     |
| C(28)-H(28C)     | 0.9800     |
| C(9)-O(1)-C(1)   | 117.63(16) |
| C(6)-O(2)-H(2)   | 111(3)     |
| C(13)-O(3)-H(3)  | 108(2)     |
| O(1)-C(1)-C(13)  | 103.94(18) |
| O(1)-C(1)-C(14)  | 109.79(19) |
| C(13)-C(1)-C(14) | 110.8(2)   |
| O(1)-C(1)-C(2)   | 108.73(19) |
| C(13)-C(1)-C(2)  | 110.6(2)   |
| C(14)-C(1)-C(2)  | 112.6(2)   |
| C(1)-C(2)-C(3)   | 110.9(2)   |
| C(1)-C(2)-H(2A)  | 109.5      |
| C(3)-C(2)-H(2A)  | 109.5      |
| C(1)-C(2)-H(2B)  | 109.5      |
| C(3)-C(2)-H(2B)  | 109.5      |
| H(2A)-C(2)-H(2B) | 108.1      |
| C(4)-C(3)-C(2)   | 110.9(2)   |
| C(4)-C(3)-H(3A)  | 109.5      |
| C(2)-C(3)-H(3A)  | 109.5      |
| C(4)-C(3)-H(3B)  | 109.5      |
| C(2)-C(3)-H(3B)  | 109.5      |
| H(3A)-C(3)-H(3B) | 108.1      |
| C(9)-C(4)-C(5)   | 119.07(19) |
| C(9)-C(4)-C(3)   | 120.17(18) |
| C(5)-C(4)-C(3)   | 120.8(2)   |
| C(6)-C(5)-C(4)   | 119.1(2)   |
| C(6)-C(5)-C(10)  | 120.51(19) |
| C(4)-C(5)-C(10)  | 120.4(2)   |
| O(2)-C(6)-C(5)   | 121.7(2)   |
| O(2)-C(6)-C(7)   | 116.52(19) |
| C(5)-C(6)-C(7)   | 121.77(18) |
| C(8)-C(7)-C(6)   | 119.09(19) |
| C(8)-C(7)-C(11)  | 120.5(2)   |
| C(6)-C(7)-C(11)  | 120.44(19) |
| C(7)-C(8)-C(9)   | 119.2(2)   |
| C(7)-C(8)-C(12)  | 120.73(19) |

|                     |            |
|---------------------|------------|
| C(9)-C(8)-C(12)     | 120.09(18) |
| O(1)-C(9)-C(4)      | 122.95(18) |
| O(1)-C(9)-C(8)      | 115.41(19) |
| C(4)-C(9)-C(8)      | 121.63(18) |
| C(5)-C(10)-H(10A)   | 109.5      |
| C(5)-C(10)-H(10B)   | 109.5      |
| H(10A)-C(10)-H(10B) | 109.5      |
| C(5)-C(10)-H(10C)   | 109.5      |
| H(10A)-C(10)-H(10C) | 109.5      |
| H(10B)-C(10)-H(10C) | 109.5      |
| C(7)-C(11)-H(11A)   | 109.5      |
| C(7)-C(11)-H(11B)   | 109.5      |
| H(11A)-C(11)-H(11B) | 109.5      |
| C(7)-C(11)-H(11C)   | 109.5      |
| H(11A)-C(11)-H(11C) | 109.5      |
| H(11B)-C(11)-H(11C) | 109.5      |
| C(8)-C(12)-H(12A)   | 109.5      |
| C(8)-C(12)-H(12B)   | 109.5      |
| H(12A)-C(12)-H(12B) | 109.5      |
| C(8)-C(12)-H(12C)   | 109.5      |
| H(12A)-C(12)-H(12C) | 109.5      |
| H(12B)-C(12)-H(12C) | 109.5      |
| O(3)-C(13)-C(1)     | 112.4(2)   |
| O(3)-C(13)-H(13A)   | 109.1      |
| C(1)-C(13)-H(13A)   | 109.1      |
| O(3)-C(13)-H(13B)   | 109.1      |
| C(1)-C(13)-H(13B)   | 109.1      |
| H(13A)-C(13)-H(13B) | 107.9      |
| C(1)-C(14)-H(14A)   | 109.5      |
| C(1)-C(14)-H(14B)   | 109.5      |
| H(14A)-C(14)-H(14B) | 109.5      |
| C(1)-C(14)-H(14C)   | 109.5      |
| H(14A)-C(14)-H(14C) | 109.5      |
| H(14B)-C(14)-H(14C) | 109.5      |
| C(23)-O(4)-C(15)    | 117.06(15) |
| C(20)-O(5)-H(5)     | 109(2)     |
| C(27)-O(6)-H(6)     | 109(3)     |
| O(4)-C(15)-C(16)    | 110.04(19) |



|                     |            |
|---------------------|------------|
| O(4)-C(15)-C(28)    | 104.65(18) |
| C(16)-C(15)-C(28)   | 112.0(2)   |
| O(4)-C(15)-C(27)    | 106.34(17) |
| C(16)-C(15)-C(27)   | 112.39(19) |
| C(28)-C(15)-C(27)   | 111.0(2)   |
| C(15)-C(16)-C(17)   | 111.7(2)   |
| C(15)-C(16)-H(16A)  | 109.3      |
| C(17)-C(16)-H(16A)  | 109.3      |
| C(15)-C(16)-H(16B)  | 109.3      |
| C(17)-C(16)-H(16B)  | 109.3      |
| H(16A)-C(16)-H(16B) | 107.9      |
| C(18)-C(17)-C(16)   | 111.63(19) |
| C(18)-C(17)-H(17A)  | 109.3      |
| C(16)-C(17)-H(17A)  | 109.3      |
| C(18)-C(17)-H(17B)  | 109.3      |
| C(16)-C(17)-H(17B)  | 109.3      |
| H(17A)-C(17)-H(17B) | 108.0      |
| C(23)-C(18)-C(19)   | 119.29(19) |
| C(23)-C(18)-C(17)   | 120.21(17) |
| C(19)-C(18)-C(17)   | 120.5(2)   |
| C(20)-C(19)-C(18)   | 118.4(2)   |
| C(20)-C(19)-C(24)   | 121.12(18) |
| C(18)-C(19)-C(24)   | 120.44(19) |
| O(5)-C(20)-C(21)    | 116.33(19) |
| O(5)-C(20)-C(19)    | 121.5(2)   |
| C(21)-C(20)-C(19)   | 122.16(18) |
| C(20)-C(21)-C(22)   | 119.14(19) |
| C(20)-C(21)-C(25)   | 120.64(19) |
| C(22)-C(21)-C(25)   | 120.2(2)   |
| C(23)-C(22)-C(21)   | 118.9(2)   |
| C(23)-C(22)-C(26)   | 120.15(19) |
| C(21)-C(22)-C(26)   | 120.92(19) |
| O(4)-C(23)-C(18)    | 122.98(18) |
| O(4)-C(23)-C(22)    | 115.07(19) |
| C(18)-C(23)-C(22)   | 121.93(18) |
| C(19)-C(24)-H(24A)  | 109.5      |
| C(19)-C(24)-H(24B)  | 109.5      |
| H(24A)-C(24)-H(24B) | 109.5      |

|                     |            |
|---------------------|------------|
| C(19)-C(24)-H(24C)  | 109.5      |
| H(24A)-C(24)-H(24C) | 109.5      |
| H(24B)-C(24)-H(24C) | 109.5      |
| C(21)-C(25)-H(25A)  | 109.5      |
| C(21)-C(25)-H(25B)  | 109.5      |
| H(25A)-C(25)-H(25B) | 109.5      |
| C(21)-C(25)-H(25C)  | 109.5      |
| H(25A)-C(25)-H(25C) | 109.5      |
| H(25B)-C(25)-H(25C) | 109.5      |
| C(22)-C(26)-H(26A)  | 109.5      |
| C(22)-C(26)-H(26B)  | 109.5      |
| H(26A)-C(26)-H(26B) | 109.5      |
| C(22)-C(26)-H(26C)  | 109.5      |
| H(26A)-C(26)-H(26C) | 109.5      |
| H(26B)-C(26)-H(26C) | 109.5      |
| O(6)-C(27)-C(15)    | 112.99(18) |
| O(6)-C(27)-H(27A)   | 109.0      |
| C(15)-C(27)-H(27A)  | 109.0      |
| O(6)-C(27)-H(27B)   | 109.0      |
| C(15)-C(27)-H(27B)  | 109.0      |
| H(27A)-C(27)-H(27B) | 107.8      |
| C(15)-C(28)-H(28A)  | 109.5      |
| C(15)-C(28)-H(28B)  | 109.5      |
| H(28A)-C(28)-H(28B) | 109.5      |
| C(15)-C(28)-H(28C)  | 109.5      |
| H(28A)-C(28)-H(28C) | 109.5      |
| H(28B)-C(28)-H(28C) | 109.5      |

---

Symmetry transformations used to generate equivalent atoms:

**Table 4. Anisotropic displacement parameters ( $\text{\AA}^2 \times 10^3$ ) for CCDC 2115175. The anisotropic displacement factor exponent takes the form:  $-2\pi^2[h^2 a^{*2}U^{11} + \dots + 2 h k a^* b^* U^{12}]$**

|       | U <sup>11</sup> | U <sup>22</sup> | U <sup>33</sup> | U <sup>23</sup> | U <sup>13</sup> | U <sup>12</sup> |
|-------|-----------------|-----------------|-----------------|-----------------|-----------------|-----------------|
| O(1)  | 14(1)           | 33(1)           | 29(1)           | -4(1)           | 2(1)            | 1(1)            |
| O(2)  | 15(1)           | 50(1)           | 30(1)           | -4(1)           | 1(1)            | 1(1)            |
| O(3)  | 18(1)           | 52(1)           | 35(1)           | -12(1)          | 6(1)            | -6(1)           |
| C(1)  | 14(1)           | 29(1)           | 33(1)           | -1(1)           | 5(1)            | 1(1)            |
| C(2)  | 19(1)           | 27(1)           | 53(1)           | 2(1)            | 5(1)            | 5(1)            |
| C(3)  | 21(1)           | 20(1)           | 44(1)           | -2(1)           | 9(1)            | 1(1)            |
| C(4)  | 18(1)           | 21(1)           | 24(1)           | 4(1)            | 7(1)            | 1(1)            |
| C(5)  | 19(1)           | 25(1)           | 22(1)           | 2(1)            | 7(1)            | -3(1)           |
| C(6)  | 16(1)           | 34(1)           | 18(1)           | 4(1)            | 4(1)            | -1(1)           |
| C(7)  | 18(1)           | 29(1)           | 18(1)           | 4(1)            | 7(1)            | 4(1)            |
| C(8)  | 20(1)           | 25(1)           | 17(1)           | 4(1)            | 5(1)            | 3(1)            |
| C(9)  | 16(1)           | 24(1)           | 20(1)           | 3(1)            | 4(1)            | 1(1)            |
| C(10) | 27(1)           | 34(1)           | 31(1)           | -6(1)           | 7(1)            | -8(1)           |
| C(11) | 22(1)           | 43(2)           | 27(1)           | 1(1)            | 7(1)            | 10(1)           |
| C(12) | 25(1)           | 33(1)           | 24(1)           | -4(1)           | 5(1)            | 1(1)            |
| C(13) | 17(1)           | 45(2)           | 41(1)           | 0(1)            | 0(1)            | 3(1)            |
| C(14) | 28(1)           | 31(1)           | 34(1)           | -4(1)           | 10(1)           | -7(1)           |
| O(4)  | 14(1)           | 38(1)           | 27(1)           | -9(1)           | 4(1)            | -1(1)           |
| O(5)  | 15(1)           | 58(1)           | 31(1)           | -3(1)           | 2(1)            | 2(1)            |
| O(6)  | 23(1)           | 42(1)           | 34(1)           | -6(1)           | 11(1)           | -8(1)           |
| C(15) | 14(1)           | 28(1)           | 28(1)           | -2(1)           | 4(1)            | 2(1)            |
| C(16) | 18(1)           | 24(1)           | 45(1)           | 4(1)            | 7(1)            | 2(1)            |
| C(17) | 18(1)           | 22(1)           | 39(1)           | -7(1)           | 9(1)            | 1(1)            |
| C(18) | 18(1)           | 21(1)           | 23(1)           | 1(1)            | 7(1)            | 0(1)            |
| C(19) | 18(1)           | 24(1)           | 22(1)           | 2(1)            | 6(1)            | -3(1)           |
| C(20) | 15(1)           | 34(1)           | 19(1)           | 6(1)            | 4(1)            | 3(1)            |
| C(21) | 19(1)           | 33(1)           | 19(1)           | 7(1)            | 7(1)            | 6(1)            |
| C(22) | 21(1)           | 26(1)           | 16(1)           | 2(1)            | 7(1)            | 2(1)            |
| C(23) | 16(1)           | 26(1)           | 19(1)           | 2(1)            | 5(1)            | 1(1)            |
| C(24) | 23(1)           | 32(1)           | 34(1)           | -7(1)           | 8(1)            | -7(1)           |
| C(25) | 25(1)           | 44(2)           | 28(1)           | 1(1)            | 9(1)            | 12(1)           |
| C(26) | 31(1)           | 33(1)           | 26(1)           | -6(1)           | 10(1)           | 2(1)            |
| C(27) | 19(1)           | 24(1)           | 33(1)           | -3(1)           | 6(1)            | -1(1)           |

C(28) 18(1) 54(2) 36(1) -3(1) -2(1) 2(1)

---

**Table 5. Hydrogen coordinates (  $\times 10^4$ ) and isotropic displacement parameters ( $\text{\AA}^2 \times 10^{-3}$ ) for CCDC 2115175.**

|        | x        | y        | z        | U(eq)  |
|--------|----------|----------|----------|--------|
| H(2)   | 7368(10) | 9410(60) | 9720(30) | 63(12) |
| H(3)   | 5361(8)  | 4410(60) | 6030(30) | 40(8)  |
| H(2A)  | 5538     | 10958    | 8202     | 40     |
| H(2B)  | 5752     | 10900    | 7128     | 40     |
| H(3A)  | 6156     | 12149    | 8825     | 34     |
| H(3B)  | 6036     | 10238    | 9689     | 34     |
| H(10A) | 6832     | 12617    | 9703     | 46     |
| H(10B) | 7045     | 10778    | 10652    | 46     |
| H(10C) | 6638     | 11270    | 10619    | 46     |
| H(11A) | 7389     | 5389     | 7877     | 46     |
| H(11B) | 7103     | 4276     | 6780     | 46     |
| H(11C) | 7183     | 3090     | 8105     | 46     |
| H(12A) | 6164     | 3513     | 6408     | 41     |
| H(12B) | 6530     | 2235     | 6939     | 41     |
| H(12C) | 6499     | 4042     | 5837     | 41     |
| H(13A) | 5120     | 8072     | 6936     | 42     |
| H(13B) | 5360     | 8019     | 5942     | 42     |
| H(14A) | 5532     | 4805     | 8694     | 46     |
| H(14B) | 5432     | 7213     | 9236     | 46     |
| H(14C) | 5835     | 6407     | 9476     | 46     |
| H(5)   | 2636(10) | 580(60)  | 5170(30) | 66(13) |
| H(6)   | 4805(8)  | 3340(70) | 5940(30) | 60(10) |
| H(16A) | 4249     | -942     | 7865     | 35     |
| H(16B) | 4457     | -769     | 6779     | 35     |
| H(17A) | 3954     | -123     | 5333     | 32     |
| H(17B) | 3841     | -2090    | 6181     | 32     |
| H(24A) | 3136     | -2574    | 5259     | 44     |
| H(24B) | 3379     | -1355    | 4458     | 44     |
| H(24C) | 2972     | -669     | 4259     | 44     |
| H(25A) | 2794     | 6852     | 6901     | 47     |
| H(25B) | 2861     | 5602     | 8208     | 47     |
| H(25C) | 2584     | 4543     | 7072     | 47     |

|        |      |      |      |    |
|--------|------|------|------|----|
| H(26A) | 3418 | 7697 | 8110 | 44 |
| H(26B) | 3803 | 6601 | 8555 | 44 |
| H(26C) | 3492 | 5874 | 9213 | 44 |
| H(27A) | 4119 | 3887 | 5698 | 30 |
| H(27B) | 4424 | 5434 | 6503 | 30 |
| H(28A) | 4677 | 4397 | 8649 | 56 |
| H(28B) | 4869 | 2327 | 8103 | 56 |
| H(28C) | 4642 | 1803 | 9109 | 56 |

---

**Table 6. Torsion angles [°] for CCDC 2115175.**

---

|                       |             |
|-----------------------|-------------|
| C(9)-O(1)-C(1)-C(13)  | 163.8(2)    |
| C(9)-O(1)-C(1)-C(14)  | -77.6(2)    |
| C(9)-O(1)-C(1)-C(2)   | 46.0(2)     |
| O(1)-C(1)-C(2)-C(3)   | -61.9(3)    |
| C(13)-C(1)-C(2)-C(3)  | -175.38(19) |
| C(14)-C(1)-C(2)-C(3)  | 60.0(3)     |
| C(1)-C(2)-C(3)-C(4)   | 45.3(3)     |
| C(2)-C(3)-C(4)-C(9)   | -13.7(3)    |
| C(2)-C(3)-C(4)-C(5)   | 166.1(2)    |
| C(9)-C(4)-C(5)-C(6)   | 3.4(3)      |
| C(3)-C(4)-C(5)-C(6)   | -176.36(19) |
| C(9)-C(4)-C(5)-C(10)  | -176.08(19) |
| C(3)-C(4)-C(5)-C(10)  | 4.1(3)      |
| C(4)-C(5)-C(6)-O(2)   | -178.7(2)   |
| C(10)-C(5)-C(6)-O(2)  | 0.8(3)      |
| C(4)-C(5)-C(6)-C(7)   | -0.1(3)     |
| C(10)-C(5)-C(6)-C(7)  | 179.4(2)    |
| O(2)-C(6)-C(7)-C(8)   | 175.55(19)  |
| C(5)-C(6)-C(7)-C(8)   | -3.1(3)     |
| O(2)-C(6)-C(7)-C(11)  | -4.7(3)     |
| C(5)-C(6)-C(7)-C(11)  | 176.7(2)    |
| C(6)-C(7)-C(8)-C(9)   | 2.9(3)      |
| C(11)-C(7)-C(8)-C(9)  | -176.87(19) |
| C(6)-C(7)-C(8)-C(12)  | -178.92(19) |
| C(11)-C(7)-C(8)-C(12) | 1.3(3)      |
| C(1)-O(1)-C(9)-C(4)   | -14.4(3)    |
| C(1)-O(1)-C(9)-C(8)   | 166.46(18)  |
| C(5)-C(4)-C(9)-O(1)   | 177.28(18)  |
| C(3)-C(4)-C(9)-O(1)   | -2.9(3)     |
| C(5)-C(4)-C(9)-C(8)   | -3.6(3)     |
| C(3)-C(4)-C(9)-C(8)   | 176.15(19)  |
| C(7)-C(8)-C(9)-O(1)   | 179.57(18)  |
| C(12)-C(8)-C(9)-O(1)  | 1.4(3)      |
| C(7)-C(8)-C(9)-C(4)   | 0.4(3)      |
| C(12)-C(8)-C(9)-C(4)  | -177.75(19) |
| O(1)-C(1)-C(13)-O(3)  | 62.3(3)     |

|                         |             |
|-------------------------|-------------|
| C(14)-C(1)-C(13)-O(3)   | -55.6(3)    |
| C(2)-C(1)-C(13)-O(3)    | 178.8(2)    |
| C(23)-O(4)-C(15)-C(16)  | -46.6(2)    |
| C(23)-O(4)-C(15)-C(28)  | -167.0(2)   |
| C(23)-O(4)-C(15)-C(27)  | 75.4(2)     |
| O(4)-C(15)-C(16)-C(17)  | 59.3(2)     |
| C(28)-C(15)-C(16)-C(17) | 175.19(17)  |
| C(27)-C(15)-C(16)-C(17) | -59.0(2)    |
| C(15)-C(16)-C(17)-C(18) | -42.2(3)    |
| C(16)-C(17)-C(18)-C(23) | 13.2(3)     |
| C(16)-C(17)-C(18)-C(19) | -167.45(19) |
| C(23)-C(18)-C(19)-C(20) | -3.0(3)     |
| C(17)-C(18)-C(19)-C(20) | 177.67(18)  |
| C(23)-C(18)-C(19)-C(24) | 176.24(19)  |
| C(17)-C(18)-C(19)-C(24) | -3.1(3)     |
| C(18)-C(19)-C(20)-O(5)  | 179.24(19)  |
| C(24)-C(19)-C(20)-O(5)  | 0.0(3)      |
| C(18)-C(19)-C(20)-C(21) | 0.6(3)      |
| C(24)-C(19)-C(20)-C(21) | -178.6(2)   |
| O(5)-C(20)-C(21)-C(22)  | -176.09(19) |
| C(19)-C(20)-C(21)-C(22) | 2.6(3)      |
| O(5)-C(20)-C(21)-C(25)  | 4.1(3)      |
| C(19)-C(20)-C(21)-C(25) | -177.2(2)   |
| C(20)-C(21)-C(22)-C(23) | -3.3(3)     |
| C(25)-C(21)-C(22)-C(23) | 176.50(19)  |
| C(20)-C(21)-C(22)-C(26) | 177.76(19)  |
| C(25)-C(21)-C(22)-C(26) | -2.4(3)     |
| C(15)-O(4)-C(23)-C(18)  | 17.5(3)     |
| C(15)-O(4)-C(23)-C(22)  | -164.04(18) |
| C(19)-C(18)-C(23)-O(4)  | -179.39(19) |
| C(17)-C(18)-C(23)-O(4)  | 0.0(3)      |
| C(19)-C(18)-C(23)-C(22) | 2.3(3)      |
| C(17)-C(18)-C(23)-C(22) | -178.39(19) |
| C(21)-C(22)-C(23)-O(4)  | -177.51(18) |
| C(26)-C(22)-C(23)-O(4)  | 1.4(3)      |
| C(21)-C(22)-C(23)-C(18) | 0.9(3)      |
| C(26)-C(22)-C(23)-C(18) | 179.84(19)  |
| O(4)-C(15)-C(27)-O(6)   | -173.90(16) |



|                        |          |
|------------------------|----------|
| C(16)-C(15)-C(27)-O(6) | -53.4(2) |
| C(28)-C(15)-C(27)-O(6) | 72.8(3)  |

---

Symmetry transformations used to generate equivalent atoms:

**Table 7. Hydrogen bonds for CCDC 2115175 [ $\text{\AA}$  and  $^\circ$ ].**

| D-H...A            | d(D-H)  | d(H...A) | d(D...A)   | $\angle(\text{DHA})$ |
|--------------------|---------|----------|------------|----------------------|
| O(6)-H(6)...O(3)   | 0.84(3) | 1.90(3)  | 2.725(2)   | 167(4)               |
| O(5)-H(5)...O(5)#1 | 0.88(3) | 2.47(3)  | 3.2899(15) | 156(3)               |
| O(3)-H(3)...O(6)#2 | 0.82(3) | 2.05(3)  | 2.783(2)   | 149(3)               |
| O(2)-H(2)...O(2)#3 | 0.87(3) | 2.50(3)  | 3.3356(15) | 163(3)               |

Symmetry transformations used to generate equivalent atoms:

#1  $-x+1/2, y-1/2, -z+1$  #2  $-x+1, y, -z+1$  #3  $-x+3/2, y+1/2, -z+2$
